# Supplementary material for: Exploring Structure–Activity Relationships and Modes of Action of Laterocidine
Source: PubMed Central journal article supplement (PMC11428279; doi:10.1021/acscentsci.4c00776), 2024-08-06
Supplement: oc4c00776_si_001.pdf [file oc4c00776_si_001.pdf]

## Supporting Information

### **Exploring Structure-Activity Relationships and Modes of Action of Laterocidine**

Varsha J. Thombare,<sup>†a</sup> James D. Swarbrick,<sup>†a</sup> Mohammad A. K. Azad,<sup>b</sup> Yan Zhu,<sup>b</sup> Jing Lu,<sup>b</sup> Heidi Y. Yu,<sup>b</sup> Hasini Wickremasinghe,<sup>b</sup> Xiaoji He,<sup>b</sup> Mahimna Bandiatmakur,<sup>b</sup> Rong Li,<sup>b</sup> Phillip J. Bergen,<sup>b</sup> Tony Velkov,<sup>a</sup> Jiping Wang,<sup>b</sup> Kade D. Roberts,<sup>b</sup> Jian Li,<sup>b\*</sup> Nitin A. Patil<sup>b\*</sup>

a. Biomedicine Discovery Institute, Infection Program and Department of Pharmacology, Monash University, Melbourne, VIC 3800, Australia.

b. Biomedicine Discovery Institute, Infection Program and Department of Microbiology, Monash University, Melbourne, VIC 3800, Australia.

† Equal first authors.

\* Corresponding authors:

Dr Nitin Patil at 15 Innovation Walk, Monash University, Clayton campus, Melbourne 3800, Australia. Tel: +61 3 9905 1015; Email: [nitin.patil@monash.edu](mailto:nitin.patil@monash.edu)

Prof Jian Li at 19 Innovation Walk, Monash University, Clayton campus, Melbourne 3800, Australia. Email: [Jian.Li@monash.edu](mailto:Jian.Li@monash.edu)

**This file includes the following:**

|                                                        |            |
|--------------------------------------------------------|------------|
| <b>1. Methods</b>                                      | <b>S3</b>  |
| <b>2. Synthesis of Alloc-Gly-OH</b>                    | <b>S3</b>  |
| <b>Figure S1</b>                                       |            |
| <b>3. Peptide structures, and characterization</b>     | <b>S4</b>  |
| <b>4. HPLC and mass spectrometry data</b>              | <b>S18</b> |
| <b>Figures S3 to S29</b>                               |            |
| <b>5. Antimicrobial activity of selected analogues</b> | <b>S44</b> |
| <b>Table S1 and S2</b>                                 |            |
| <b>6. In vitro toxicity of selected analogues</b>      | <b>S44</b> |
| <b>Figure S30</b>                                      |            |
| <b>7. NMR data</b>                                     | <b>S45</b> |
| <b>Figures S31 to S37</b>                              |            |
| <b>Table S3 to S6</b>                                  |            |
| <b>8. References</b>                                   | <b>S71</b> |

## Methods

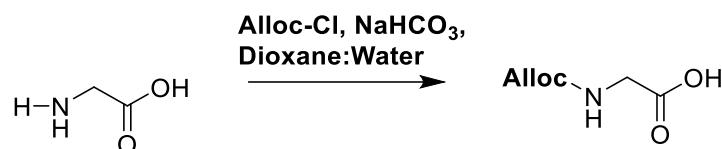

**Figure S1:** Synthesis of Alloc-Gly-OH.

**Synthesis of Alloc-Gly-OH:** 2-aminoacetic acid (5g, 66.6 mmol) and NaHCO<sub>3</sub> (11.19 g 133 mmol) were dissolved in water 100 mL and dioxane (20ml) and reaction mixture stirred at 0 °C. Then allyl chloroformate (7.10 mL, 66.6 mmol) was added dropwise and mixture was stirred for overnight at room temperature. The reaction mixture was added to Et<sub>2</sub>O and 1 M HCl and extracted with AcOEt. The organic layer was washed with brine, dried over MgSO<sub>4</sub>, and evaporated under reduced pressure. Crude was purified by flash chromatography with 10 % Methanol/DCM (8 g, 75 % yield). ESI-MS analysis of peak at 6.93 min: m/z (monoisotopic) [M+1H]<sup>1+</sup> 160.25, [M+K]<sup>39+</sup> 199.30. Calculated mass (monoisotopic) for Alloc-Gly-OH (C<sub>6</sub>H<sub>9</sub>NO<sub>4</sub>) 160.06. <sup>1</sup>H NMR (400 MHz, CDCl<sub>3</sub>) δ 6.87 (s, 1H), 5.98 – 5.88 (m, 1H), 5.29 (dd, J = 33.8, 13.7 Hz, 2H), 4.62 (d, J = 4.3 Hz, 2H), 4.05 (d, J = 5.4 Hz, 2H). <sup>13</sup>C NMR (101 MHz, CDCl<sub>3</sub>) δ 174.49, 156.41, 132.38, 118.18, 77.35, 77.03, 76.72, 66.20, 42.47.

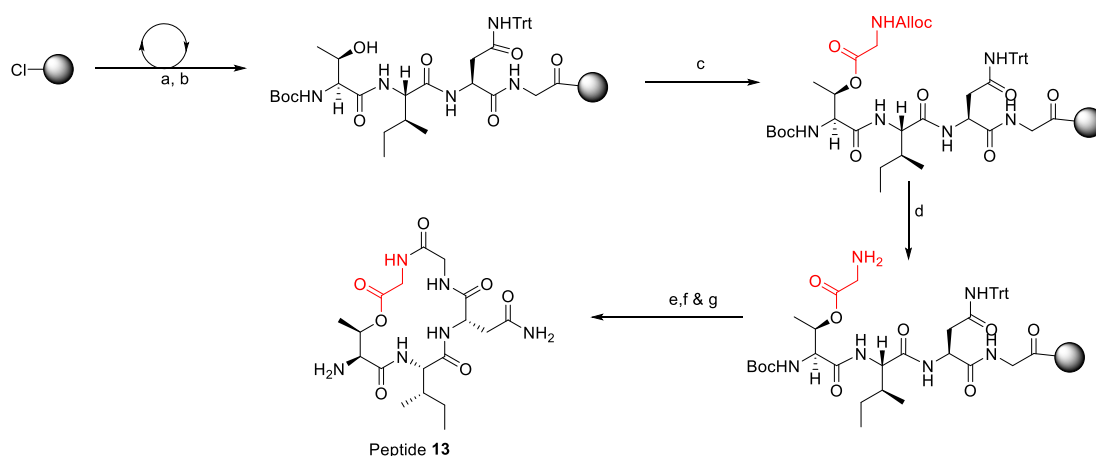

**Figure S2:** Synthesis of Peptide **13**. Fmoc-AA-OH (3 eq), HCTU (3 eq), DIPEA (6 eq), in DMF 50 min; **b**. 20 % piperidine/DMF (1 × 5 min, 1 × 10 min); **c**. Alloc-Gly-OH (5 eq), DIC (5 eq), DMAP (0.3 eq) in DMF; **d**. Palladium tetrakis(triphenylphosphine) (0.1 eq), PhSiH<sub>3</sub> (10

eq), in DCM 40 min; e. 10 % HFIP in DCM (1 × 30 min, 1 × 5 min); f. DPPA, DIEA in DMF 6 h; g. TFA:TIPS:DODT:H<sub>2</sub>O (92.5:2.5:2.5:2.5) 90 min.

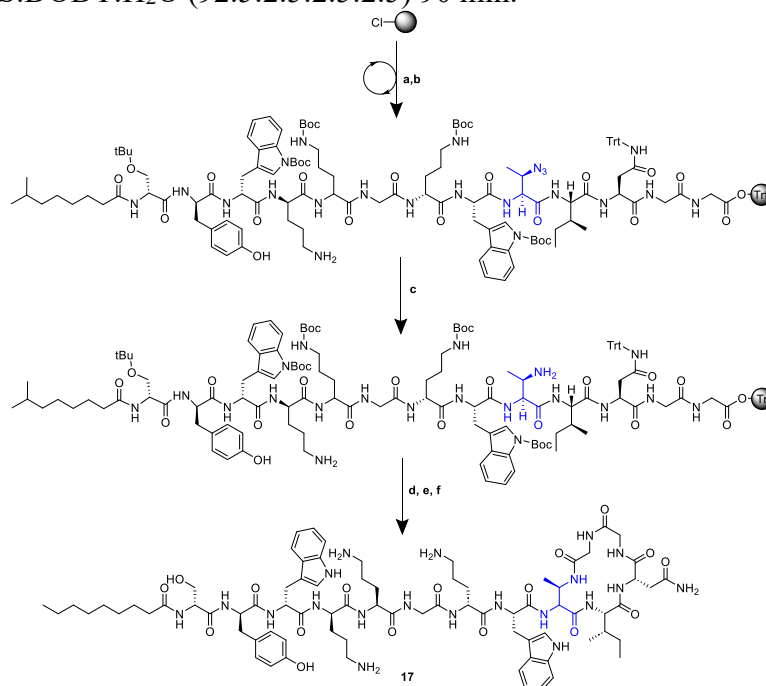

**Figure S3:** Synthesis of Peptide **17**. a. Fmoc-AA-OH (3 eq), HCTU (3 eq), DIPEA (6 eq), in DMF 50 min; b. 20 % piperidine/DMF 15 min; c. 2 M DTT, 1 M DIEA, DMF, RT; d. 10 % HFIP in DCM; e. DPPA, DIEA in DMF; f. TFA:TIPS:DODT:H<sub>2</sub>O (92.5:2.5:2.5:2.5).

### Laterocidine Peptide **1**

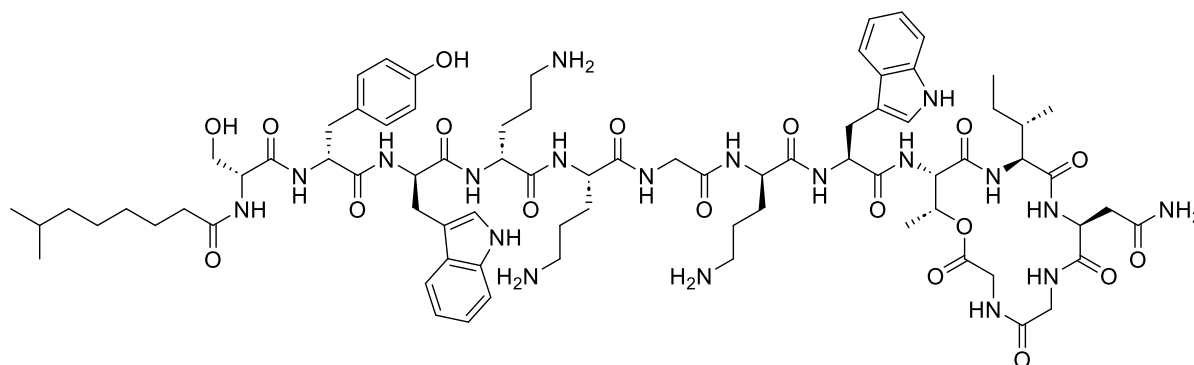

TFA salt was obtained in a yield of 27.4 mg (17.07 %), retention time (tR) at 214 nm = 13.48 min (purity: 95.12 %). ESI-MS analysis of peak at 13.48 min: m/z (monoisotopic) [M+2H]<sup>2+</sup> 803.50, [M+3H]<sup>3+</sup> 536.10. Calculated mass (monoisotopic) for Laterocidine (C<sub>78</sub>H<sub>113</sub>N<sub>19</sub>O<sub>18</sub>) 1605.88. <sup>1</sup>H NMR (600 MHz, DMSO) δ 10.69 (d, J = 19.4 Hz, 2H), 9.31 (d, J = 6.2 Hz, 1H), 9.09 (s, 1H), 8.26 – 8.20 (m, 2H), 8.15 (s, 1H), 7.99 (t, J = 7.7 Hz, 3H), 7.92 (d, J = 18.0 Hz,



### Peptide 12:

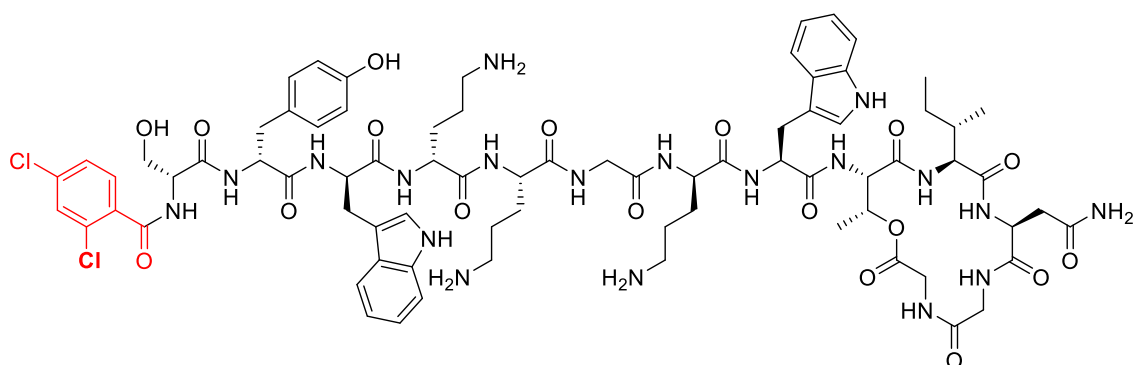

TFA salt was obtained in a yield of 14.5 mg (8.85 %), retention time ( $t_R$ ) at 214 nm = 12.76 min (purity: 97.74 %). ESI-MS analysis of peak at 12.76 min:  $m/z$  (monoisotopic)  $[M+H]^+$  1638.00,  $[M+2H]^{2+}$  820.00,  $[M+3H]^{3+}$  547.00. Calculated mass (monoisotopic) for Peptide **12** ( $C_{76}H_{99}Cl_2N_{19}O_{18}$ ) 1638.64.

### Peptide 13:

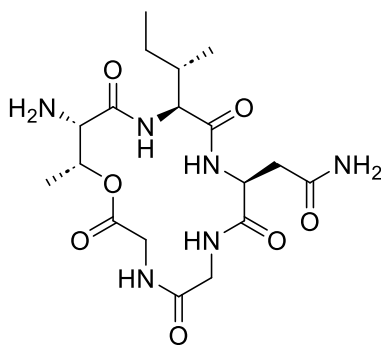

TFA salt was obtained in a yield of 3.9 mg (8.38 %), retention time ( $t_R$ ) at 214 nm = 9.57 min (purity: 95.54 %). ESI-MS analysis of peak at 9.57 min:  $m/z$  (monoisotopic)  $[M+H]^+$  443.35,  $[M+Na]^+$  465.35. Calculated mass (monoisotopic) for Peptide **13** ( $C_{69}H_{97}N_{19}O_{17}$ ) 443.22.

### Peptide 14:

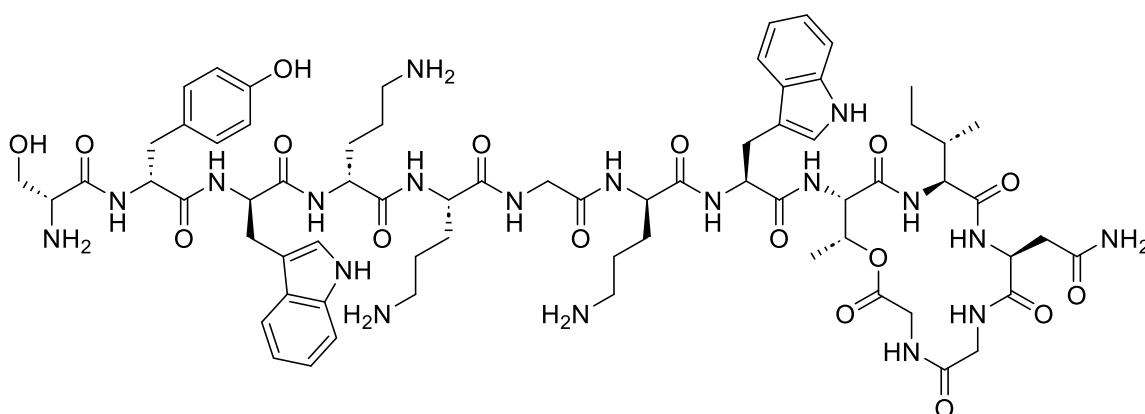

TFA salt was obtained in a yield of 4.2 mg (2.94 %), retention time ( $t_R$ ) at 214 nm = 11.16 min (purity: 95.45 %). ESI-MS analysis of peak at 11.16 min:  $m/z$  (monoisotopic)  $[M+H]^+$  1465.20,  $[M+2H]^{2+}$  733.50,  $[M+3H]^{3+}$  489.30. Calculated mass (monoisotopic) for Peptide 14 ( $C_{69}H_{97}N_{19}O_{17}$ ) 1464.65.

### Peptide 15:

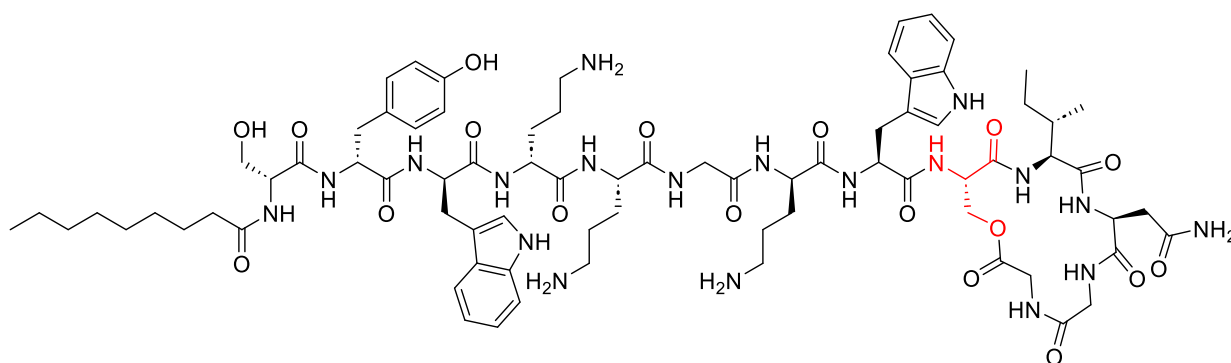

TFA salt was obtained in a yield of 28.2 mg (17.71 %), retention time ( $t_R$ ) at 214 nm = 13.52 min (purity: 95.04 %). ESI-MS analysis of peak at 13.52 min:  $m/z$  (monoisotopic)  $[M+H]^+$  1592.30,  $[M+2H]^{2+}$  796.55,  $[M+3H]^{3+}$  531.45. Calculated mass (monoisotopic) for Peptide 15 ( $C_{78}H_{114}N_{20}O_{17}$ ) 1592.86.

### Peptide 16:

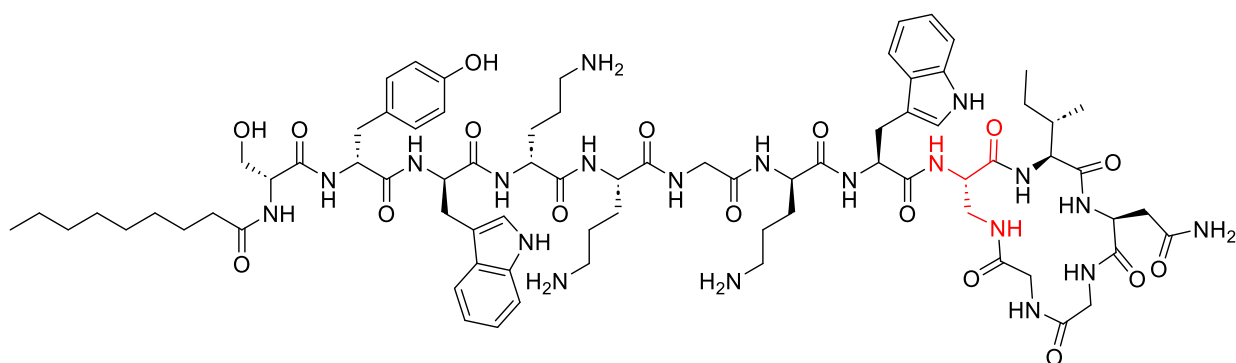

TFA salt was obtained in a yield of 2.7 mg (2.69 %), retention time ( $t_R$ ) at 214 nm = 13.23 min (purity: 99.5 %). ESI-MS analysis of peak at 13.23 min:  $m/z$  (monoisotopic)  $[M+H]^+$  1591.45,  $[M+2H]^{2+}$  796.15,  $[M+3H]^{3+}$  531.15. Calculated mass (monoisotopic) for Peptide 16 ( $C_{78}H_{114}N_{20}O_{17}$ ) 1590.86.

### Peptide 17:

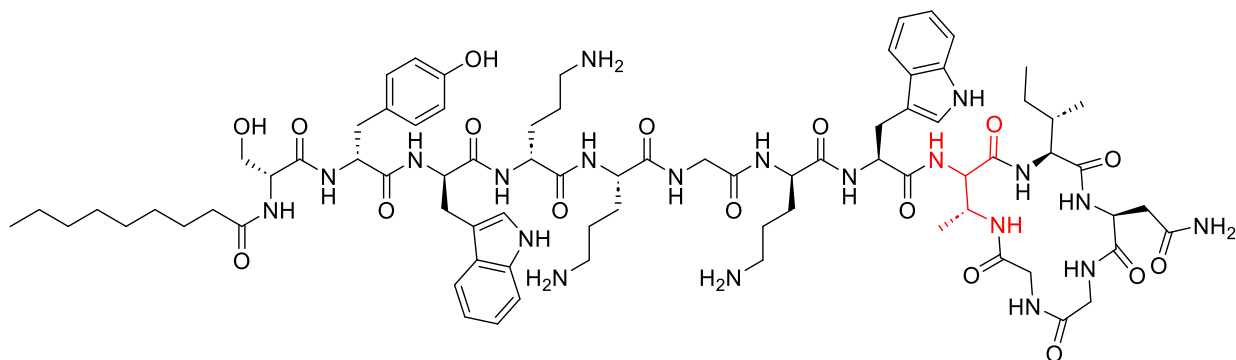

TFA salt was obtained in a yield of 51.9 mg (37.34 %), retention time ( $t_R$ ) at 214 nm = 13.13 min (purity: 95.74 %). ESI-MS analysis of peak at 13.13 min:  $m/z$  (monoisotopic)  $[M+H]^+$  1605.50,  $[M+2H]^{2+}$  803.25,  $[M+3H]^{3+}$  535.90. Calculated mass (monoisotopic) for Peptide 17 ( $C_{78}H_{113}N_{20}O_{17}$ ) 1604.87.













### Peptide 28:

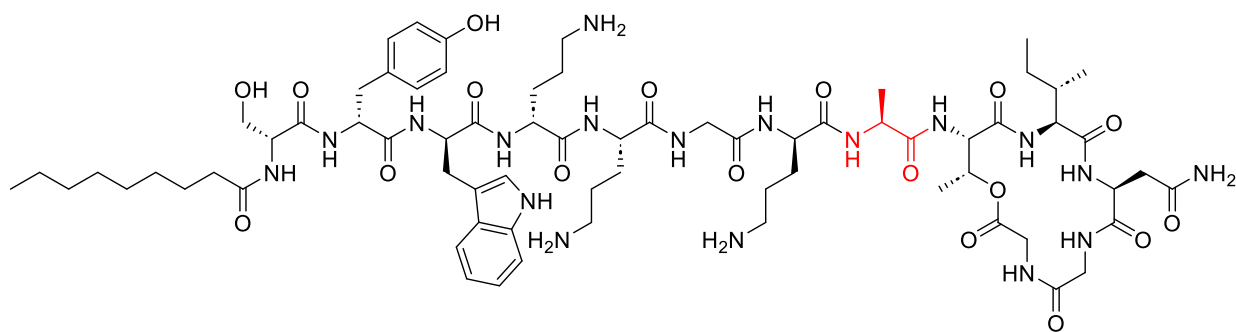

TFA salt was obtained in a yield of 2.7 mg (2.1 %), retention time ( $t_R$ ) at 214 nm = 13.24 min (purity: 98.01 %). ESI-MS analysis of peak at 13.24 min:  $m/z$  (monoisotopic)  $[M+H]^+$  1491.00,  $[M+2H]^{2+}$  745.95,  $[M+3H]^{3+}$  497.70. Calculated mass (monoisotopic) for Peptide **28** ( $C_{70}H_{108}N_{18}O_{18}$ ) 1489.74.

### Peptide 29:

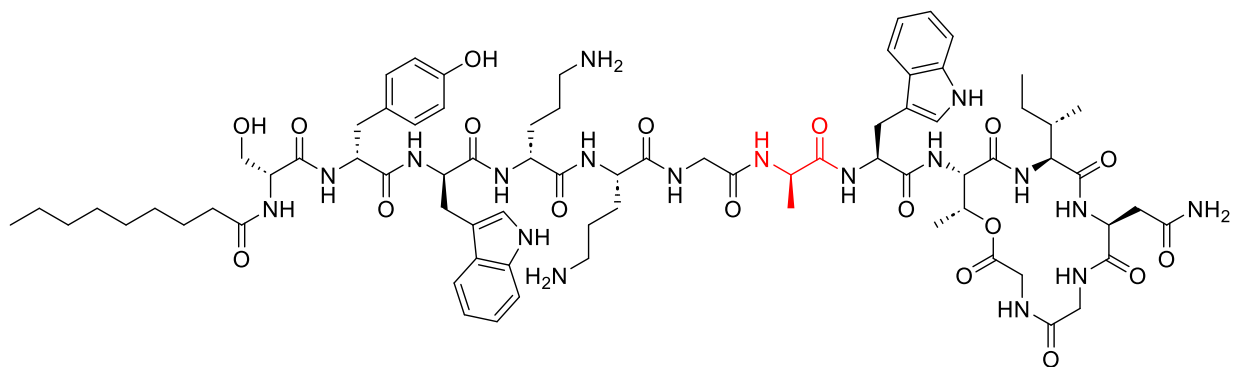

TFA salt was obtained in a yield of 4.8 mg (3.07 %), retention time ( $t_R$ ) at 214 nm = 14.26 min (purity: 97.59 %). ESI-MS analysis of peak at 14.26 min:  $m/z$  (monoisotopic)  $[M+H]^+$  1563.20,  $[M+2H]^{2+}$  782.00. Calculated mass (monoisotopic) for Peptide **29** ( $C_{76}H_{108}N_{18}O_{18}$ ) 1561.81.

### Peptide 30:

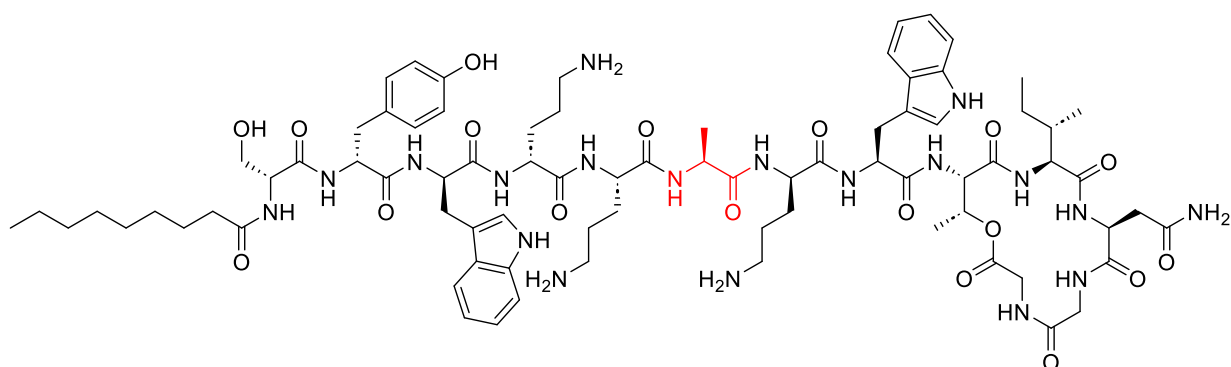

TFA salt was obtained in a yield of 7.0 mg (4.32 %), retention time ( $t_R$ ) at 214 nm = 13.59 min (purity: 95.15 %). ESI-MS analysis of peak at 13.59 min:  $m/z$  (monoisotopic)  $[M+H]^+$  1620.30,  $[M+2H]^{2+}$  810.55,  $[M+3H]^{3+}$  540.75. Calculated mass (monoisotopic) for Peptide **30** ( $C_{79}H_{115}N_{19}O_{18}$ ) 1618.90.

### Peptide 31:

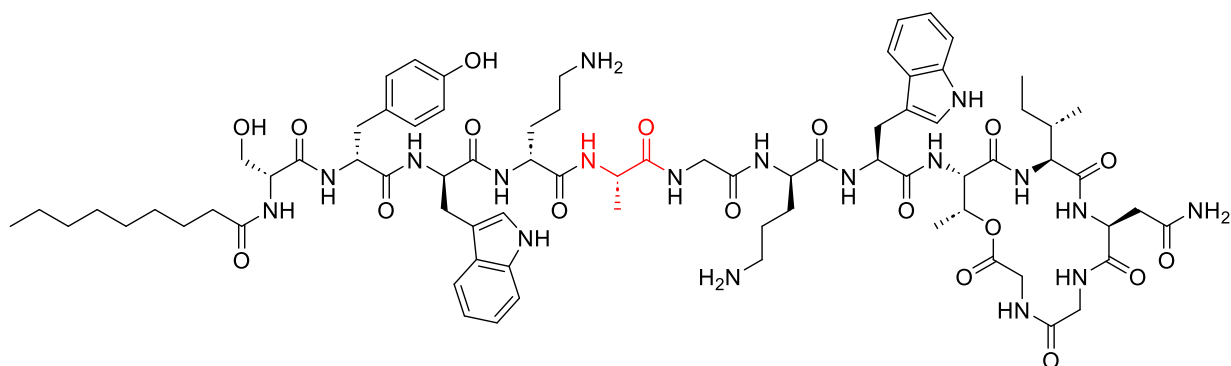

TFA salt was obtained in a yield of 6.4 mg (4.09 %), retention time ( $t_R$ ) at 214 nm = 9.73 min (purity: 96.20 %). ESI-MS analysis of peak at 9.73 min:  $m/z$  (monoisotopic)  $[M+H]^+$  1563.25,  $[M+2H]^{2+}$  782.00. Calculated mass (monoisotopic) for Peptide **31** ( $C_{76}H_{108}N_{18}O_{18}$ ) 1561.81.

### Peptide 32:

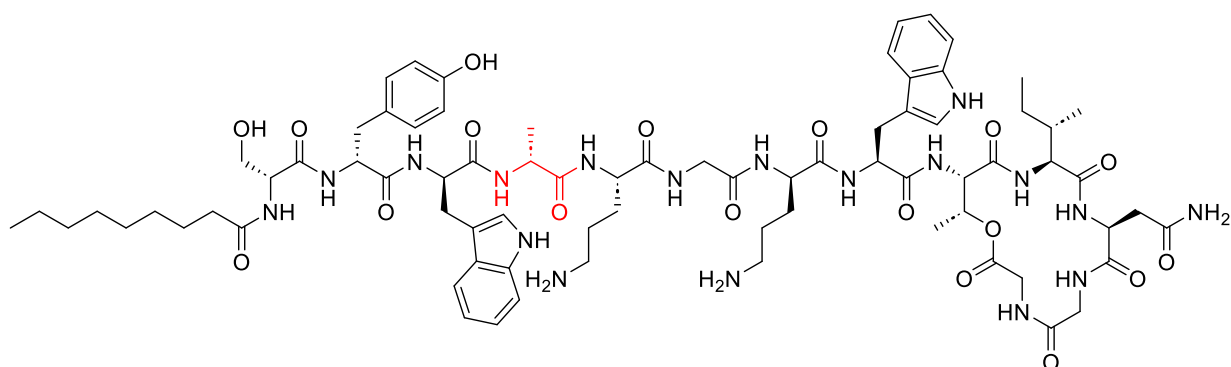

TFA salt was obtained in a yield of 4.9 mg (3.13 %), retention time ( $t_R$ ) at 214 nm = 9.93 min (purity: 98.54 %). ESI-MS analysis of peak at 9.93 min:  $m/z$  (monoisotopic)  $[M+H]^+$  1563.25,  $[M+2H]^{2+}$  782.00. Calculated mass (monoisotopic) for Peptide **32** ( $C_{76}H_{108}N_{18}O_{18}$ ) 1561.81.

### Peptide 33:

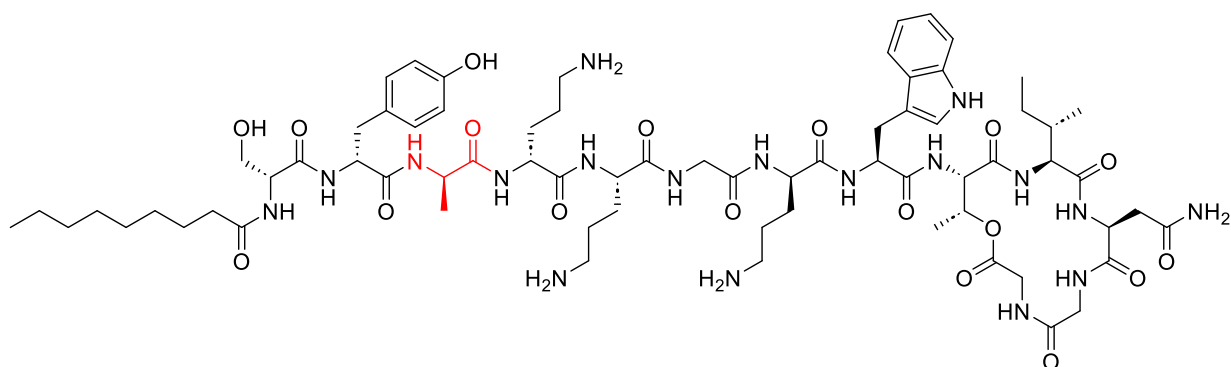

TFA salt was obtained in a yield of 1.2 mg (1.8 %), retention time ( $t_R$ ) at 214 nm = 9.03 min (purity: 97.90 %). ESI-MS analysis of peak at 9.03 min:  $m/z$  (monoisotopic),  $[M+2H]^{2+}$  745.95,  $[M+3H]^{3+}$  497.70. Calculated mass (monoisotopic) for Peptide **33** ( $C_{70}H_{108}N_{18}O_{18}$ ) 1489.74.



### Peptide 34:

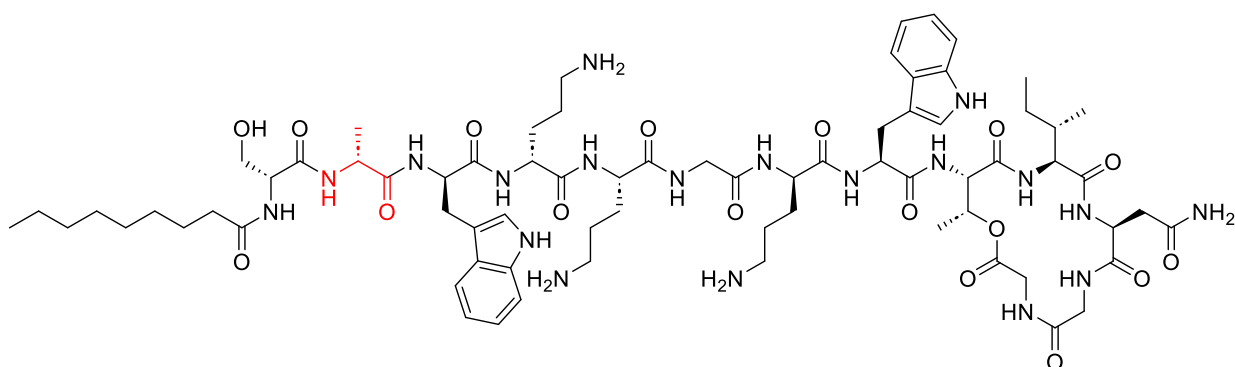

TFA salt was obtained in a yield of 5.4 mg (3.57 %), retention time ( $t_R$ ) at 214 nm = 9.33 min (purity: 95.53 %). ESI-MS analysis of peak at 9.33 min:  $m/z$  (monoisotopic)  $[M+H]^+$  1513.25,  $[M+2H]^{2+}$  757.45,  $[M+3H]^{3+}$  505.40. Calculated mass (monoisotopic) for Peptide 34 ( $C_{72}H_{109}N_{19}O_{17}$ ) 1512.78.

### Peptide 35:

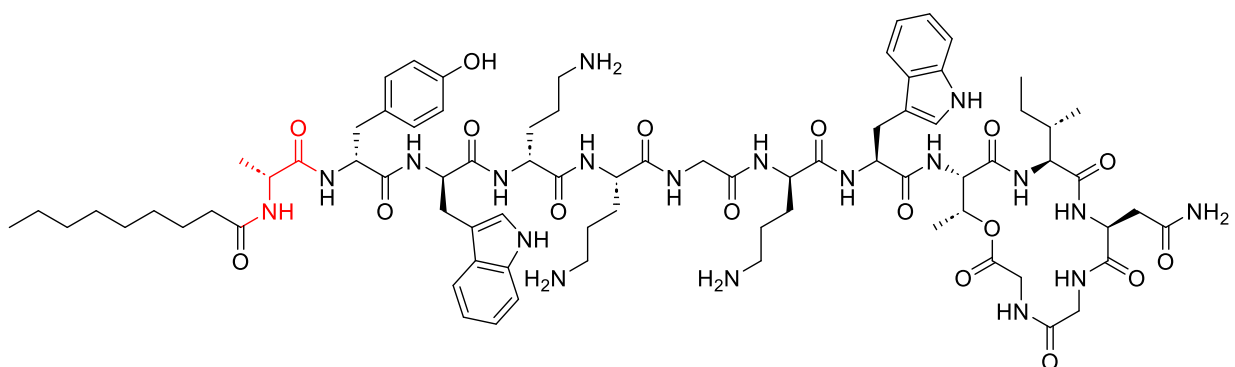

TFA salt was obtained in a yield of 5.4 mg (3.40 %), retention time ( $t_R$ ) at 214 nm = 9.56 min (purity: 97.24 %). ESI-MS analysis of peak at 9.56 min:  $m/z$  (monoisotopic)  $[M+H]^+$  1590.30,  $[M+2H]^{2+}$  795.60,  $[M+3H]^{3+}$  530.75. Calculated mass (monoisotopic) for Peptide 35 ( $C_{78}H_{113}N_{19}O_{17}$ ) 1588.88.

## HPLC and MS Data

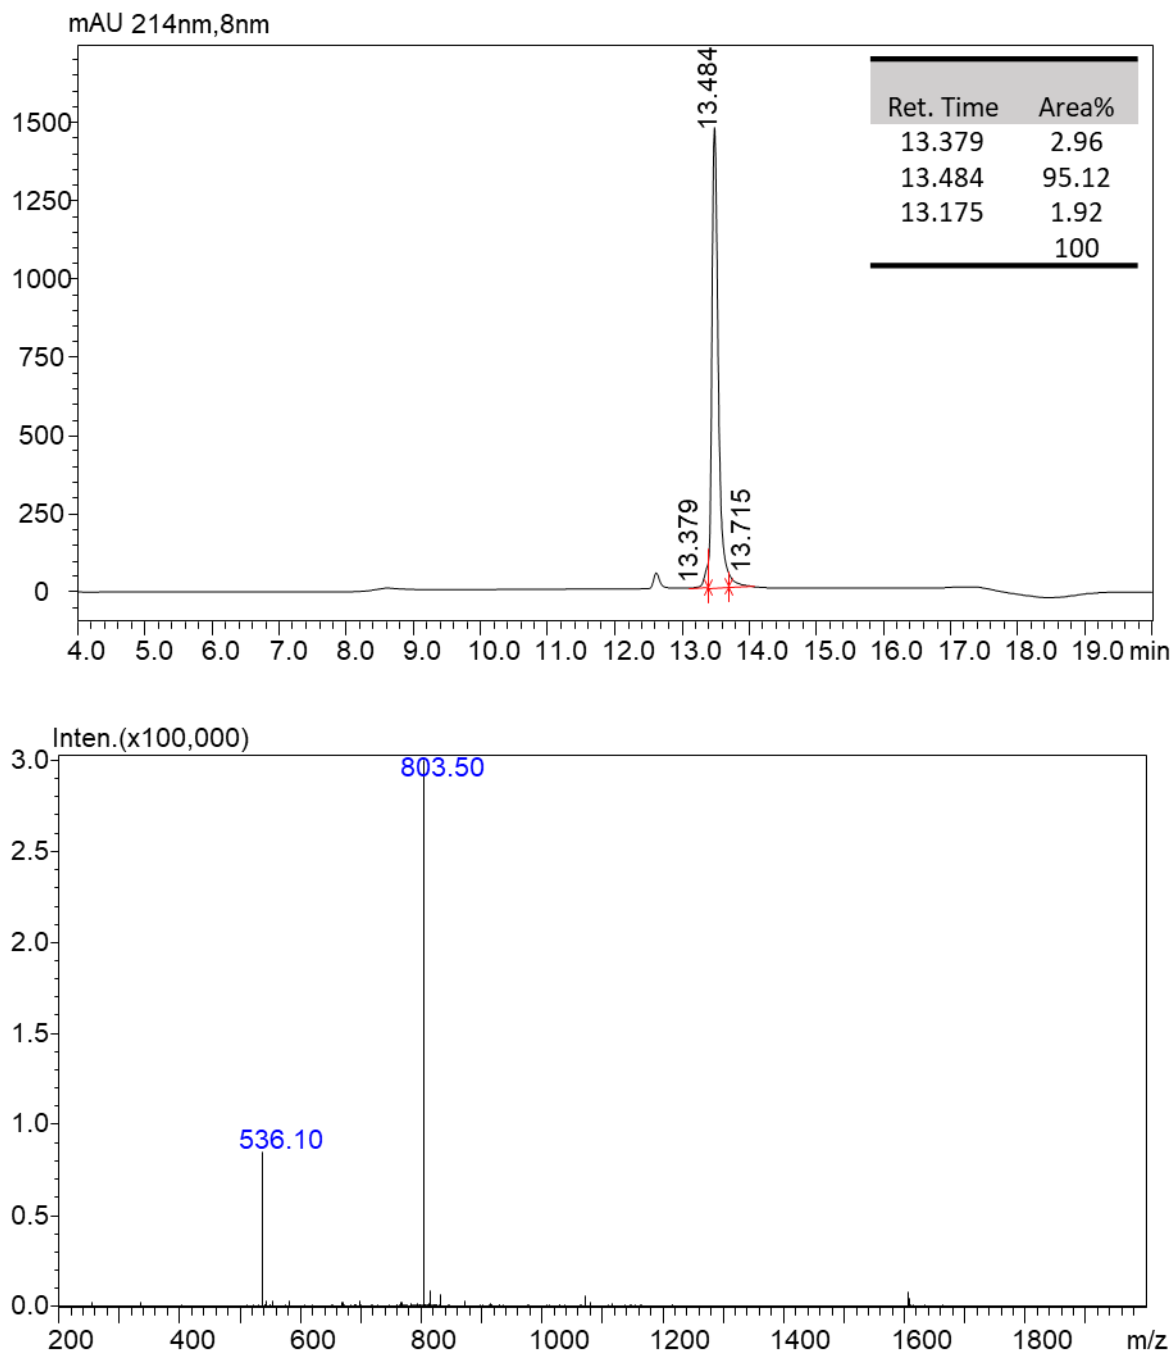

**Figure S4.** LC-MS Profile for Laterocidine Peptide 1. (A) LC profile at 214 nm. (B) MS spectrum of the peak at 13.48 min.

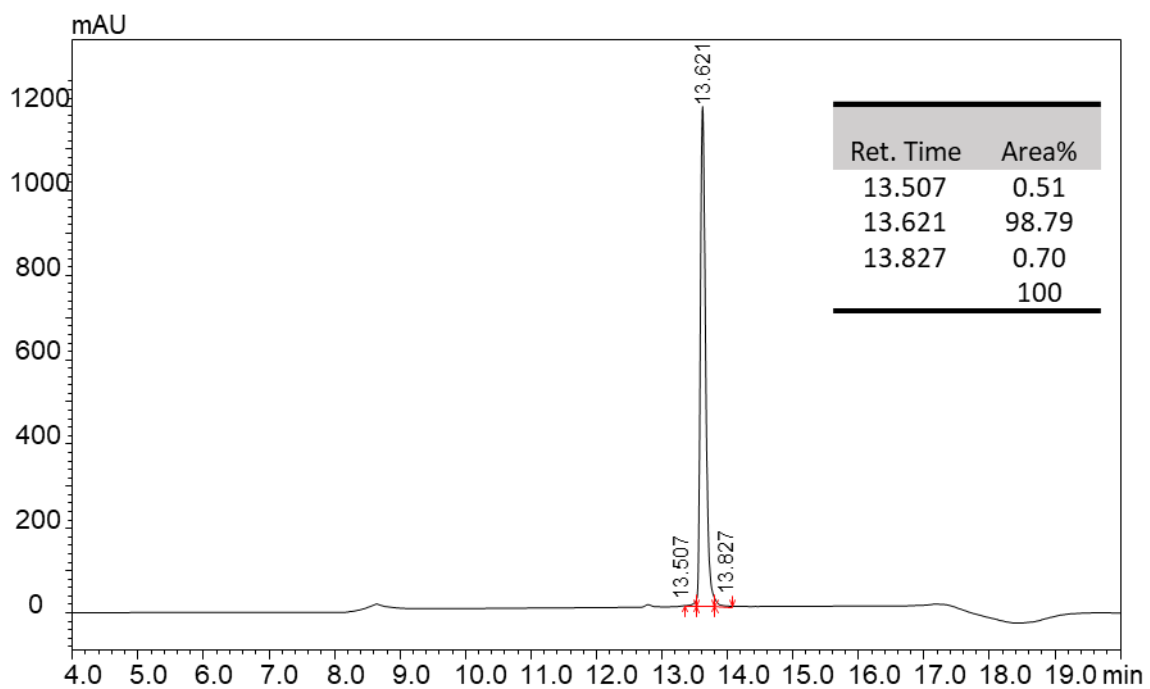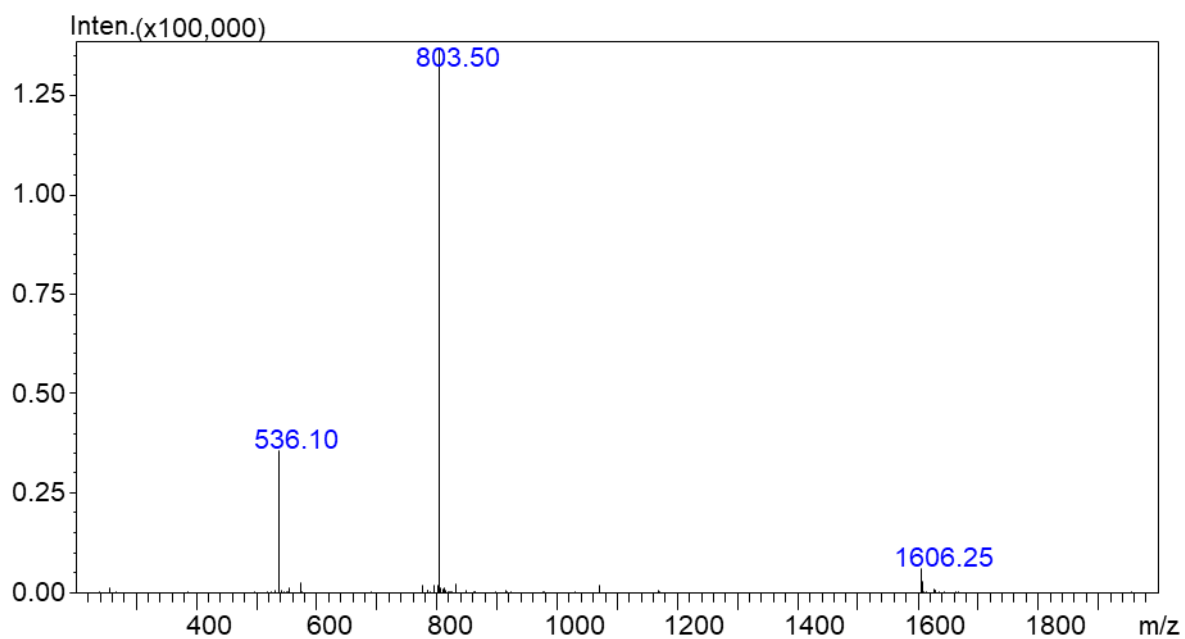

**Figure S5.** LC-MS Profile for Peptide **11**. (A) LC profile at 214 nm. (B) MS spectrum of the peak at 13.62 min.

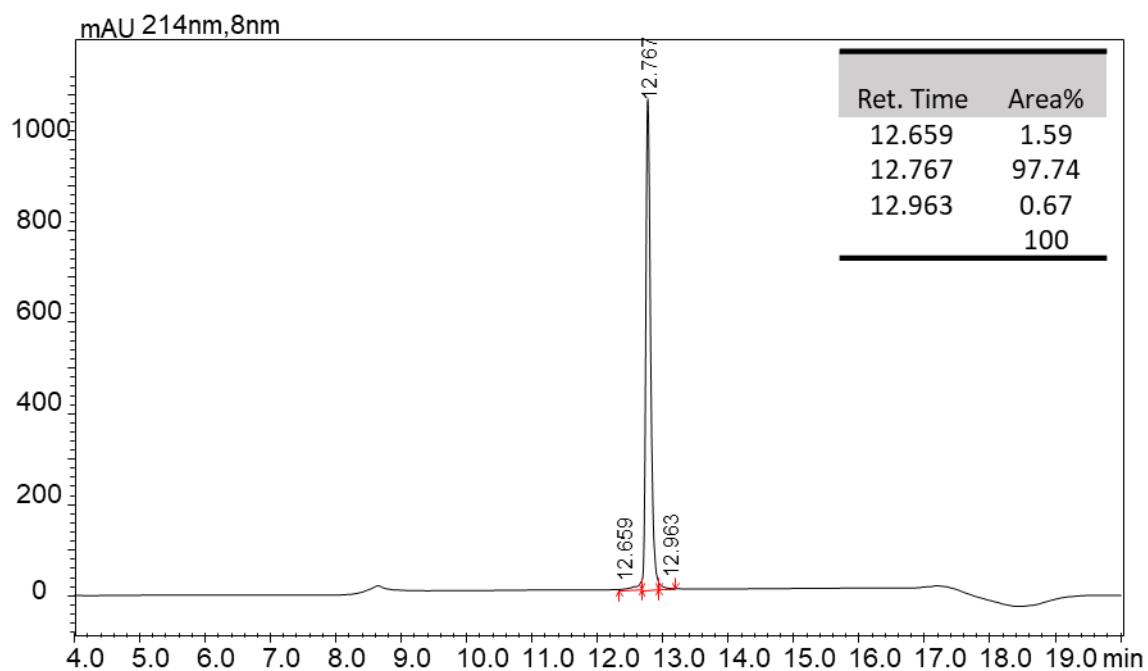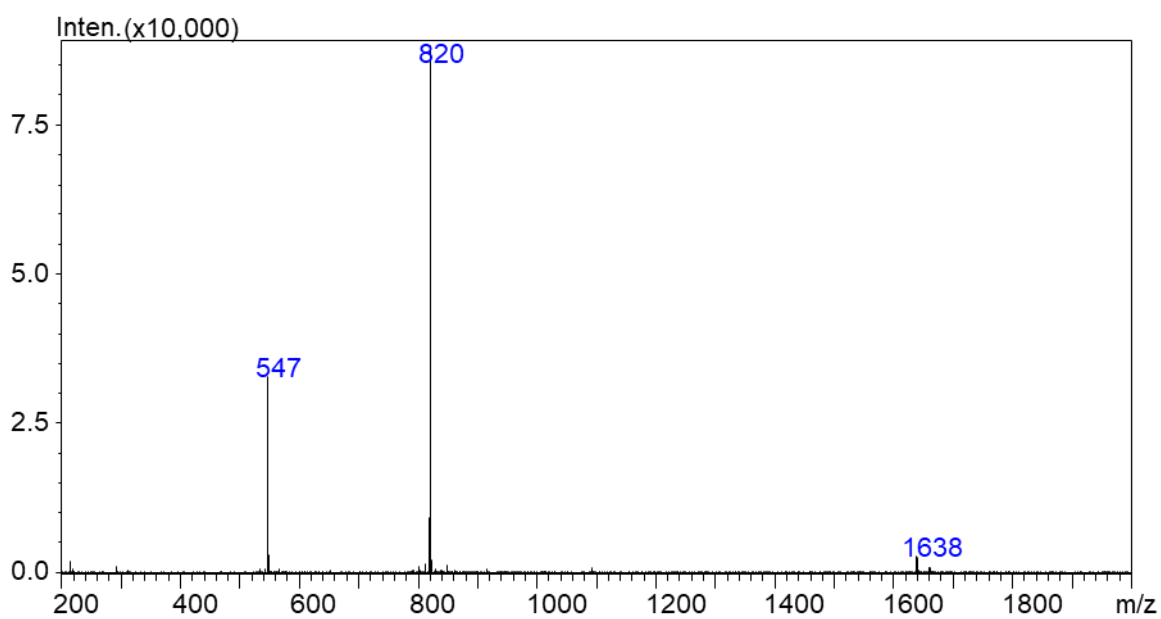

**Figure S6.** LC-MS Profile for Peptide **12**. (A) LC profile at 214 nm. (B) MS spectrum of the peak at 12.76 min.

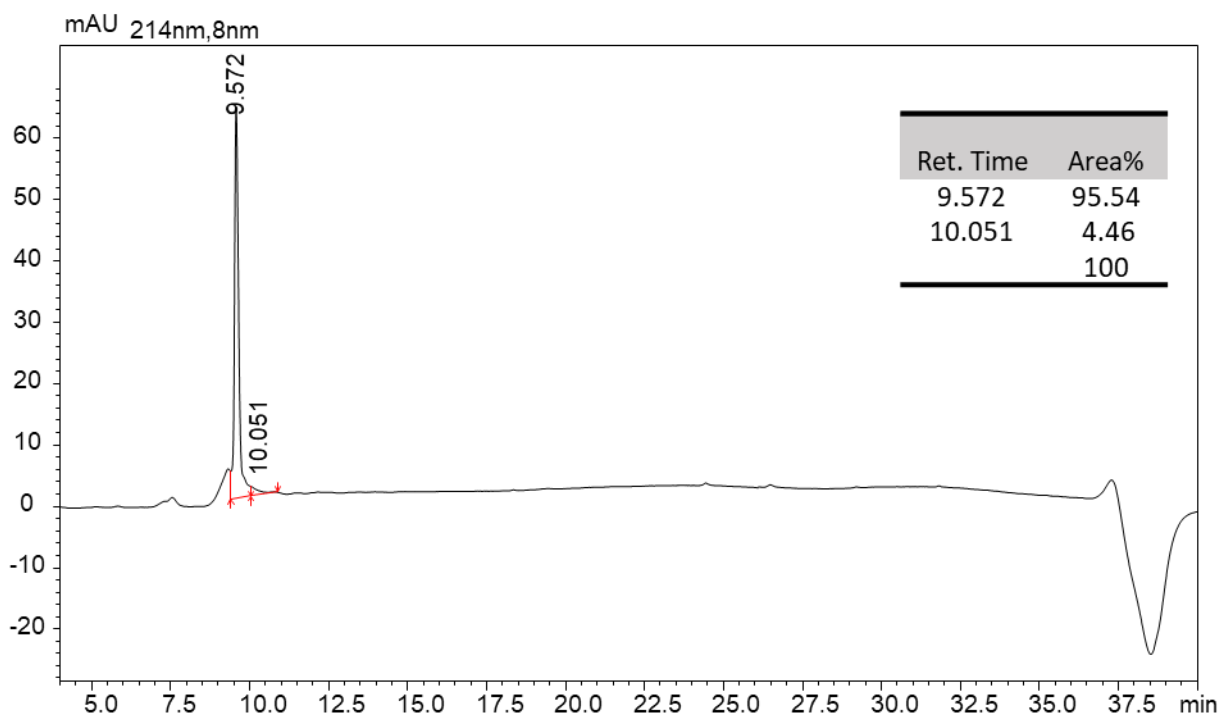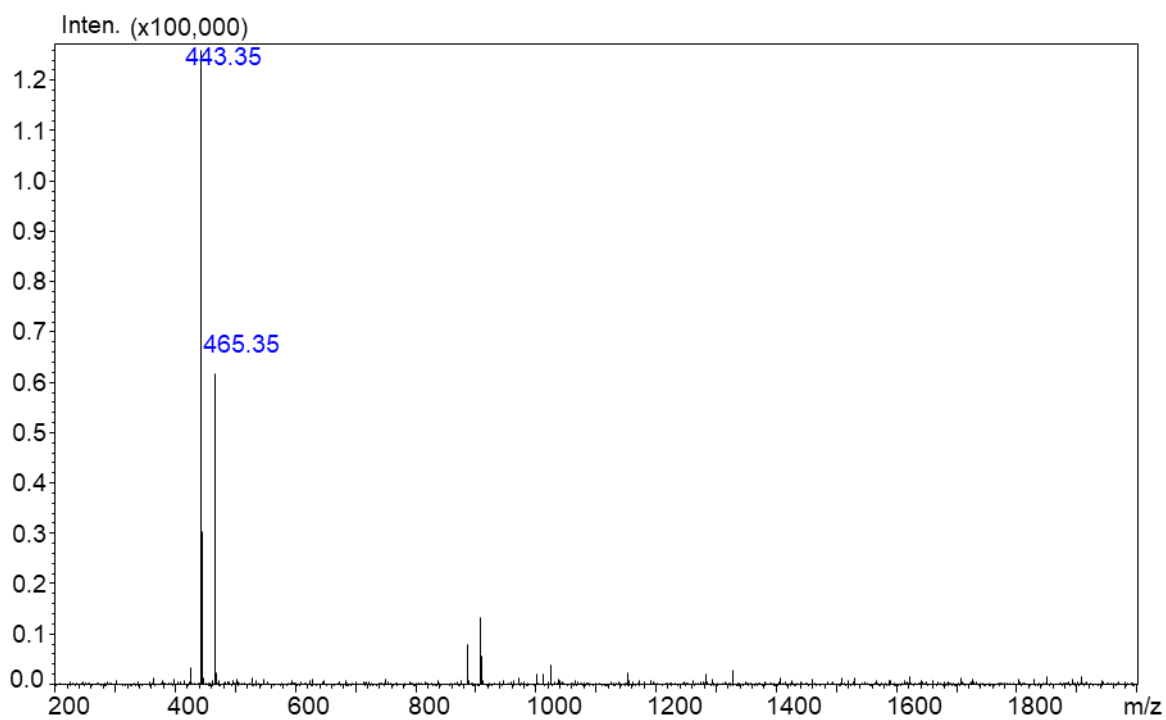

**Figure S7.** LC-MS Profile for Peptide **13**. (A) LC profile at 214 nm. (B) MS spectrum of the peak at 9.57 min.

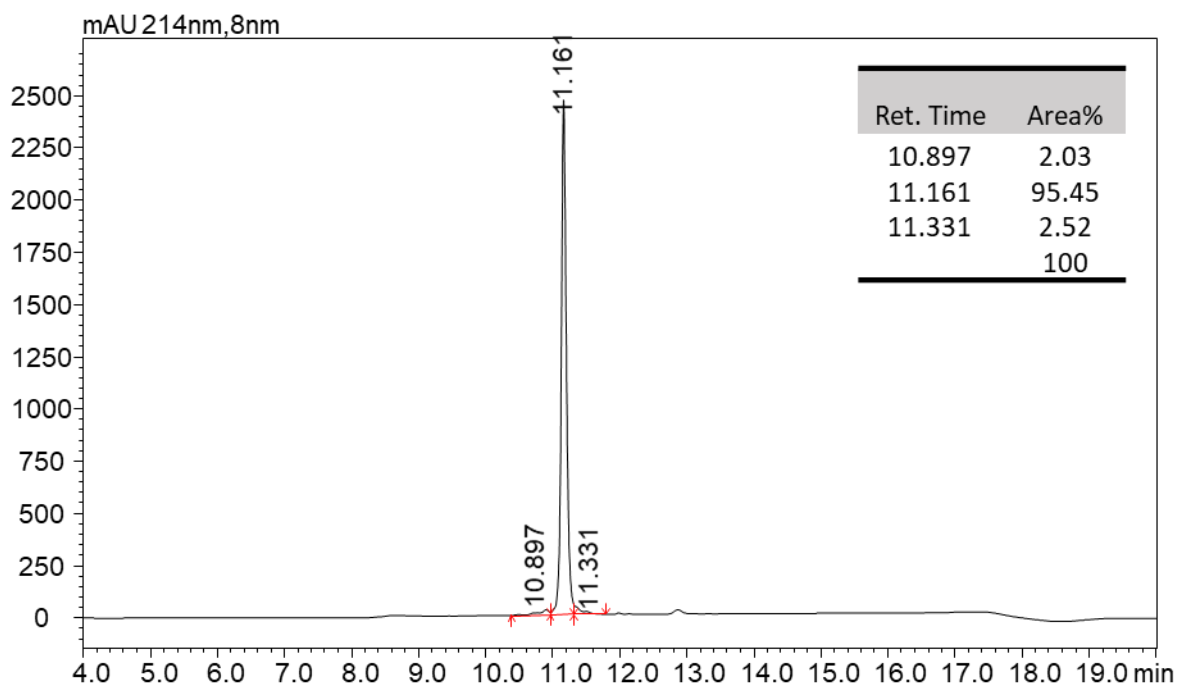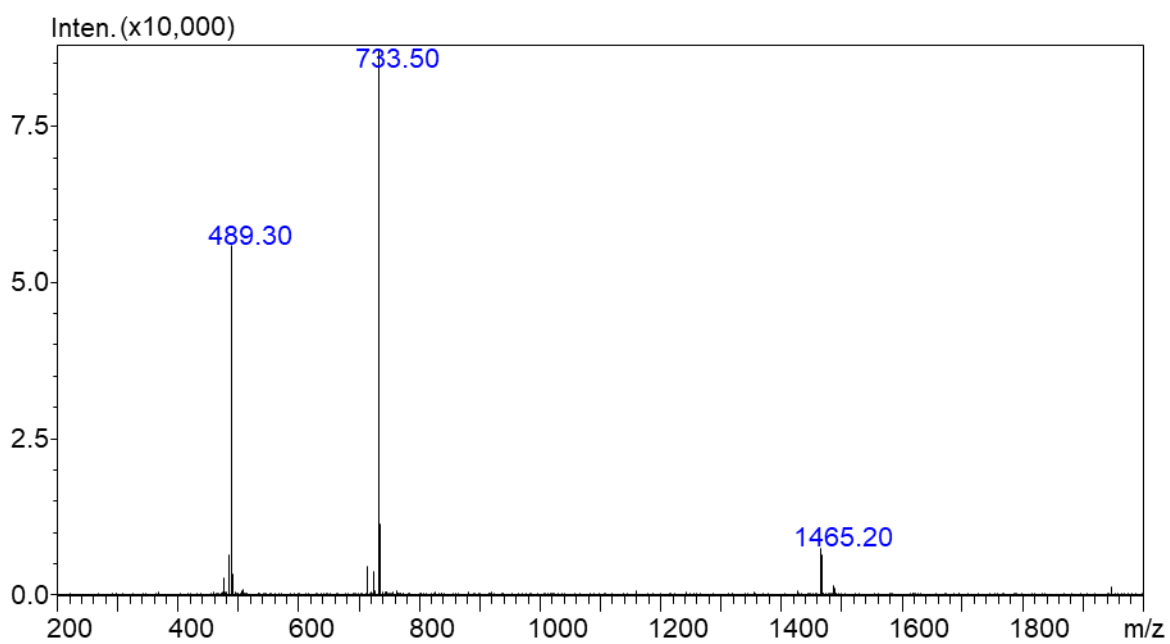

**Figure S8.** LC-MS Profile for peptide **14**. (A) LC profile at 214 nm. (B) MS spectrum of the peak at 11.16 min.

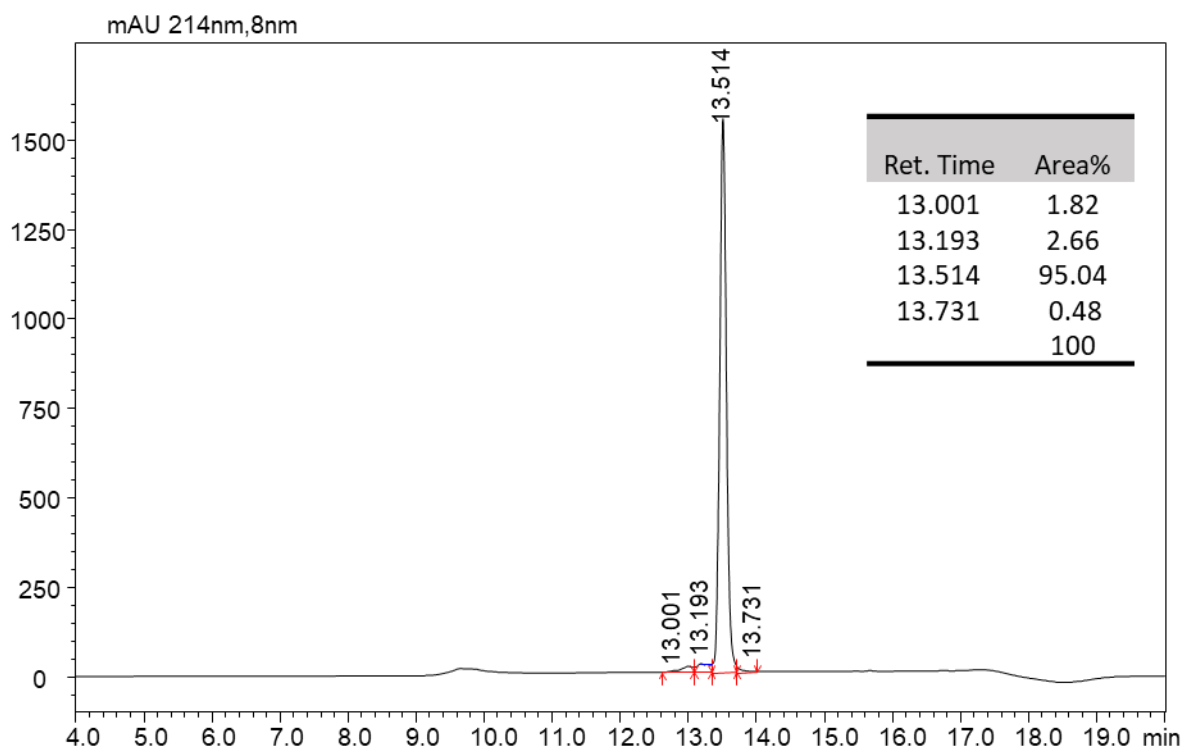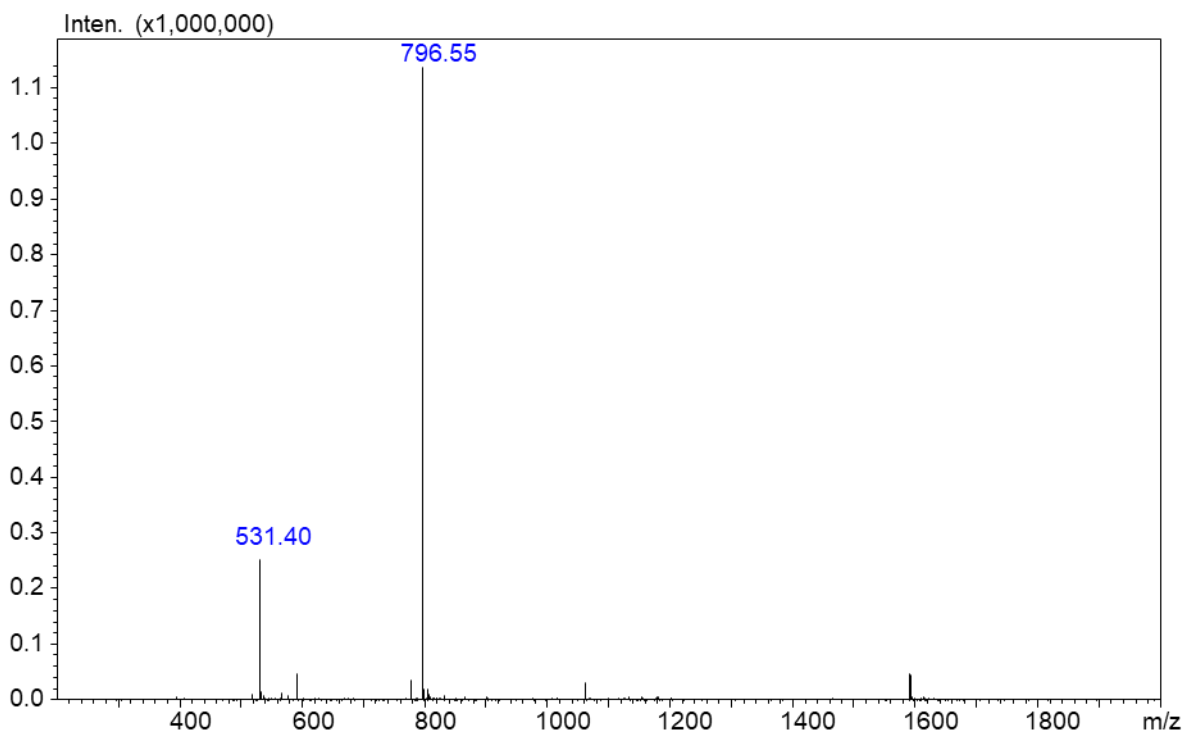

**Figure S9.** LC-MS Profile for peptide **15**. (A) LC profile at 214 nm. (B) MS spectrum of the peak at 13.52 min.

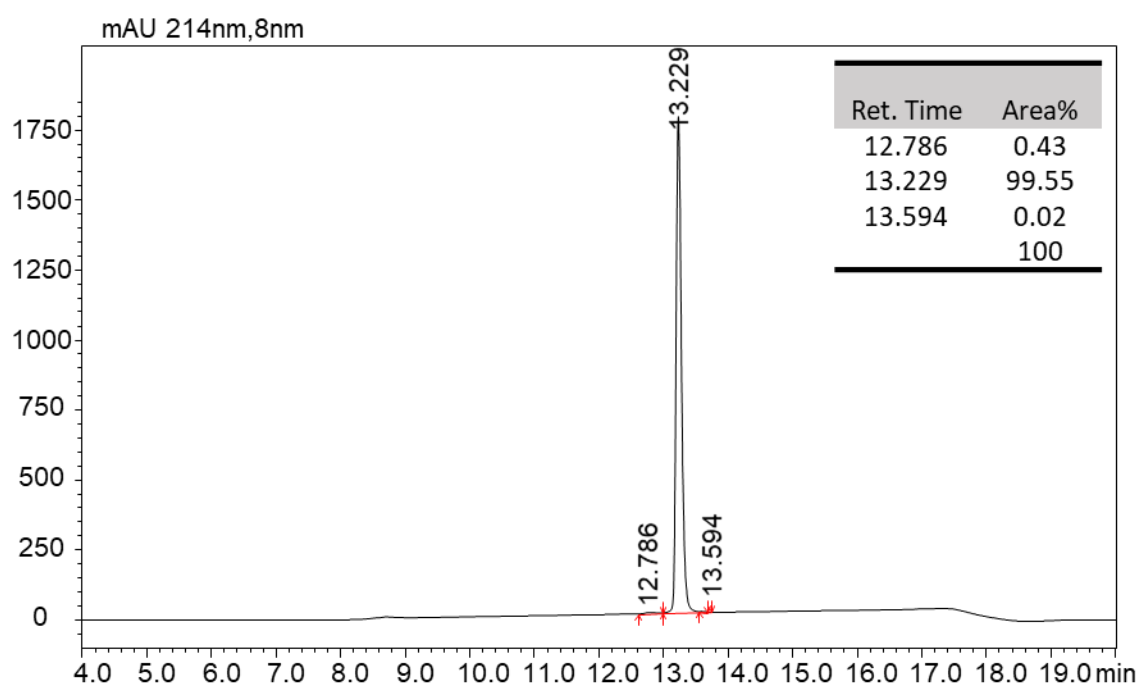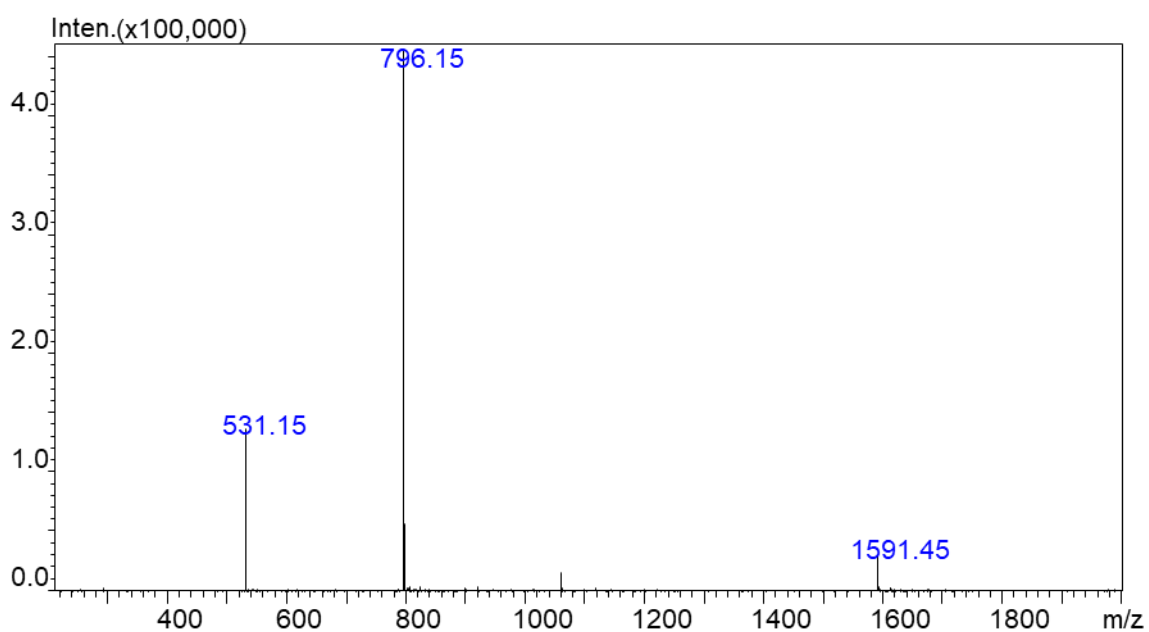

**Figure S10.** LC-MS Profile for peptide **16**. (A) LC profile at 214 nm. (B) MS spectrum of the peak at 13.23 min.



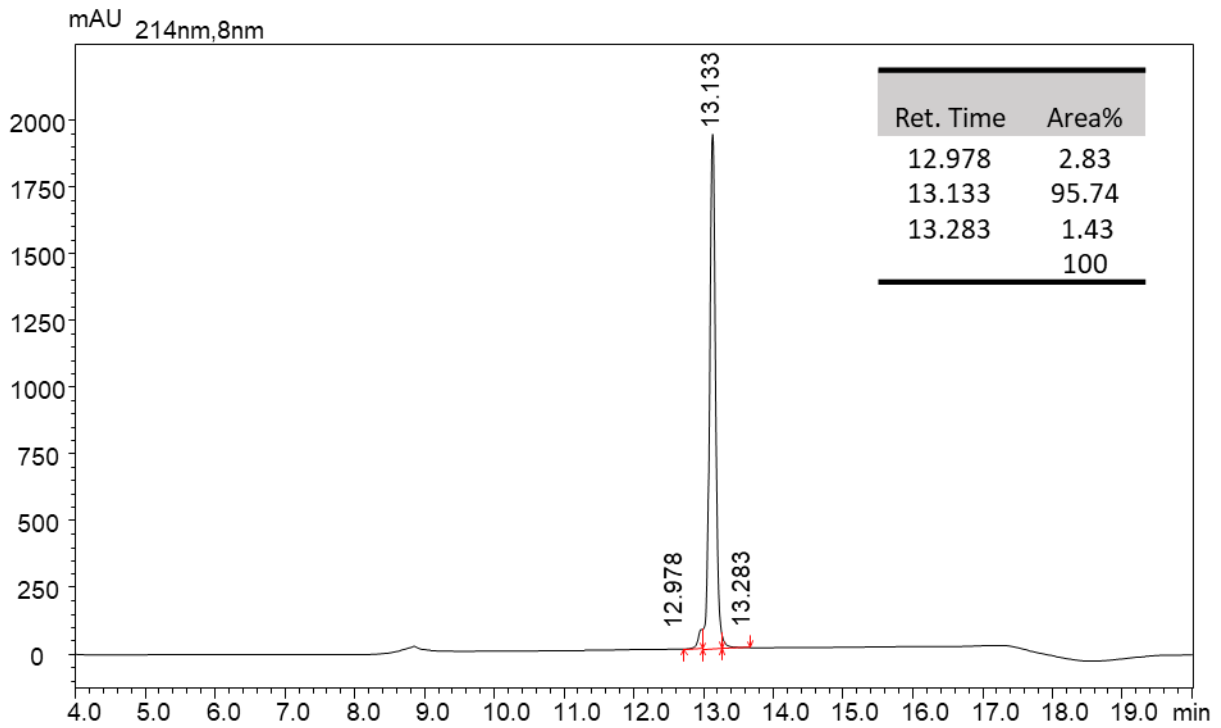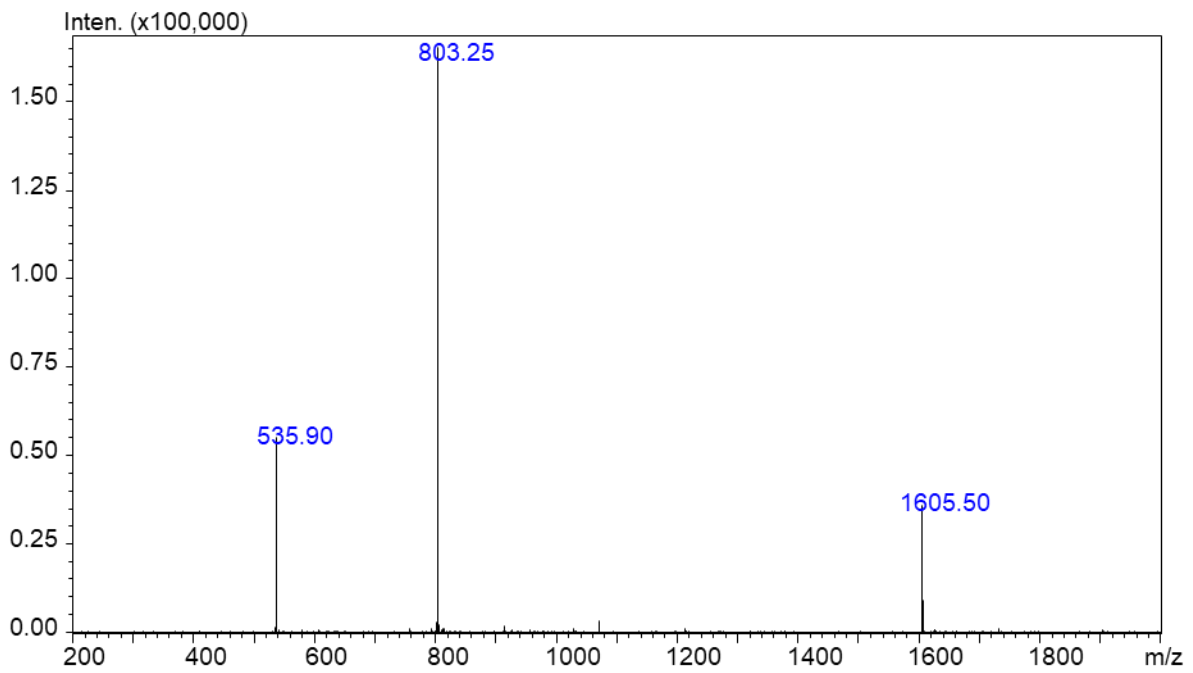

**Figure S11.** LC-MS Profile for peptide 17. (A) LC profile at 214 nm. (B) MS spectrum of the peak at 13.13 min.

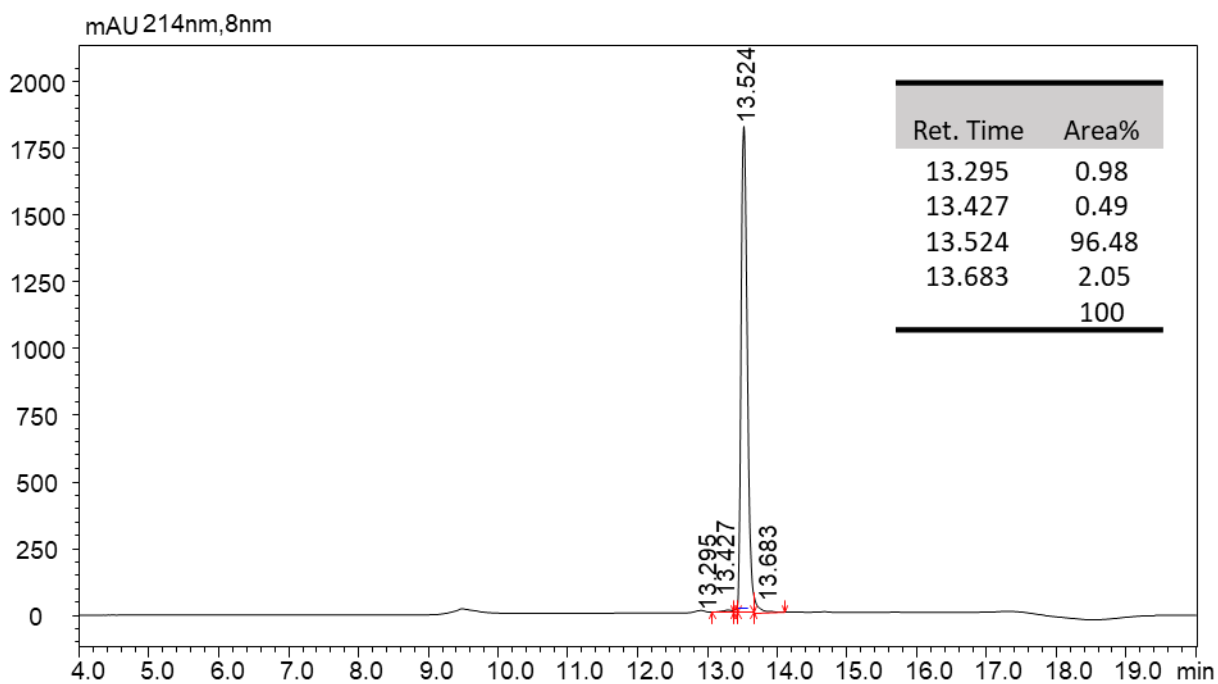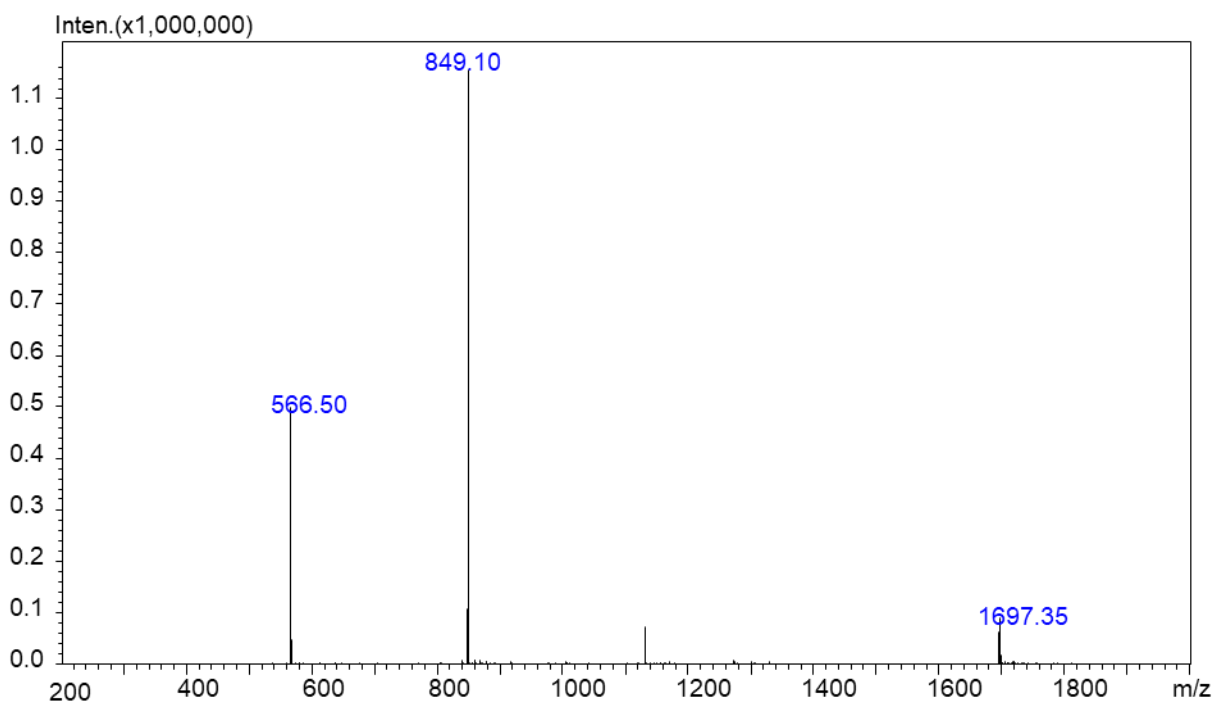

**Figure S12.** LC-MS Profile for peptide **18**. (A) LC profile at 214 nm. (B) MS spectrum of the peak at 13.52 min.

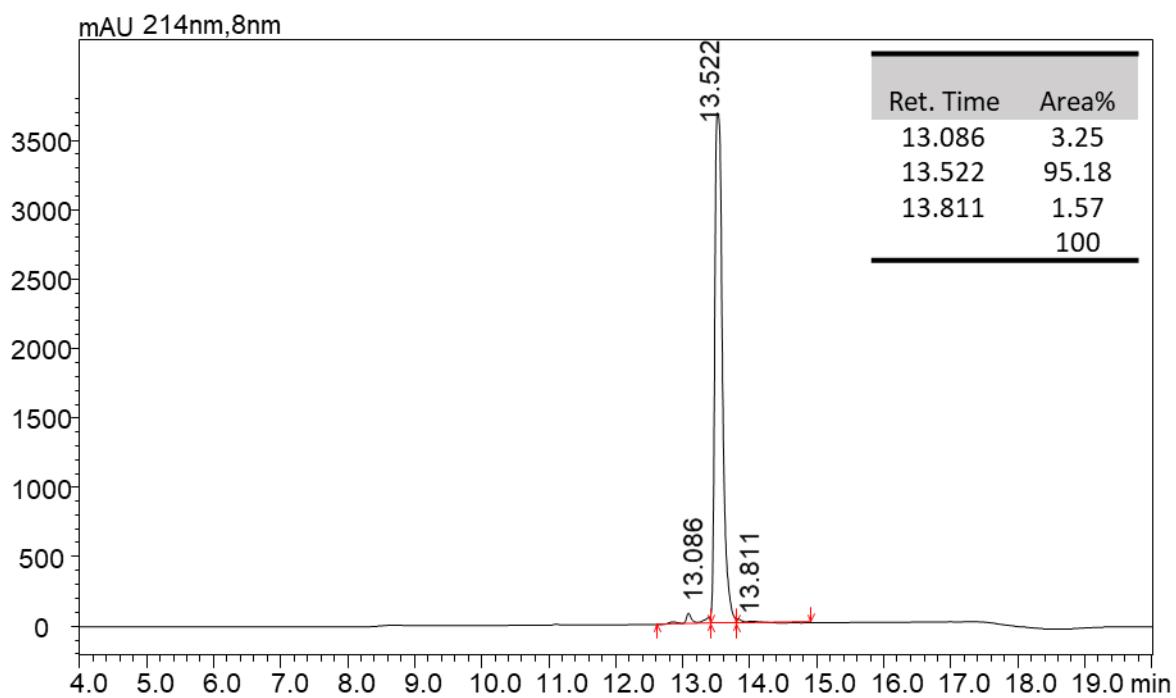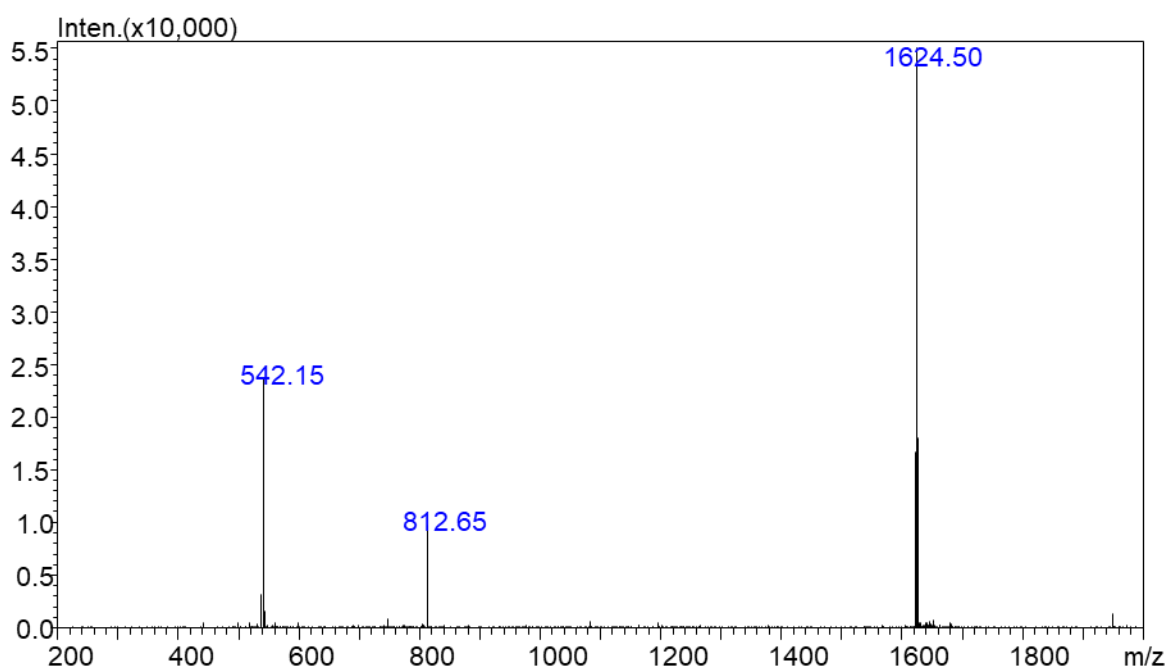

**Figure S13.** LC-MS Profile for peptide **19**. (A) LC profile at 214 nm. (B) MS spectrum of the peak at 13.52 min.

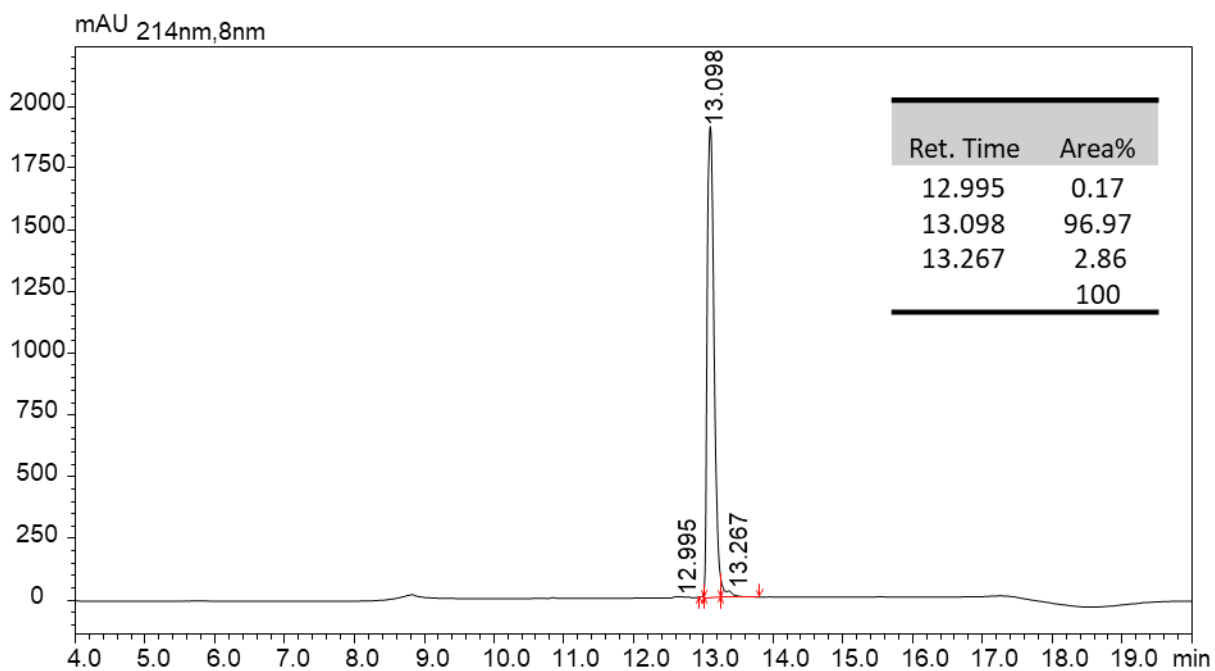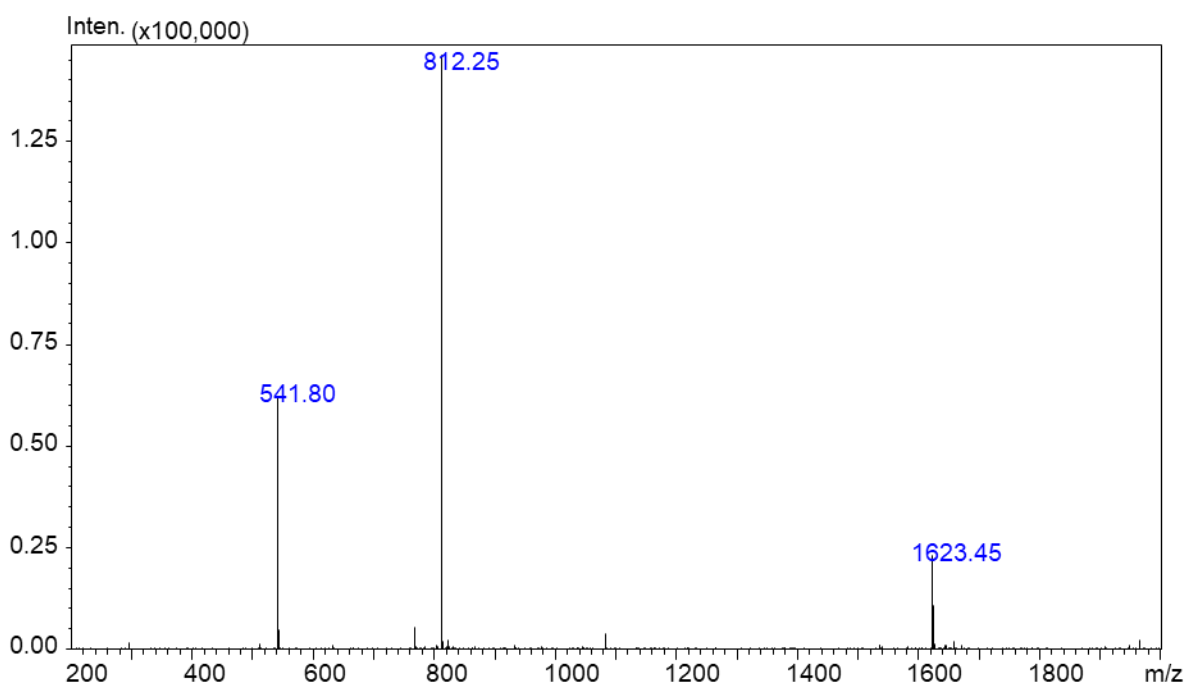

**Figure S14.** LC-MS Profile for peptide **20**. (A) LC profile at 214 nm. (B) MS spectrum of the peak at 13.09 min.

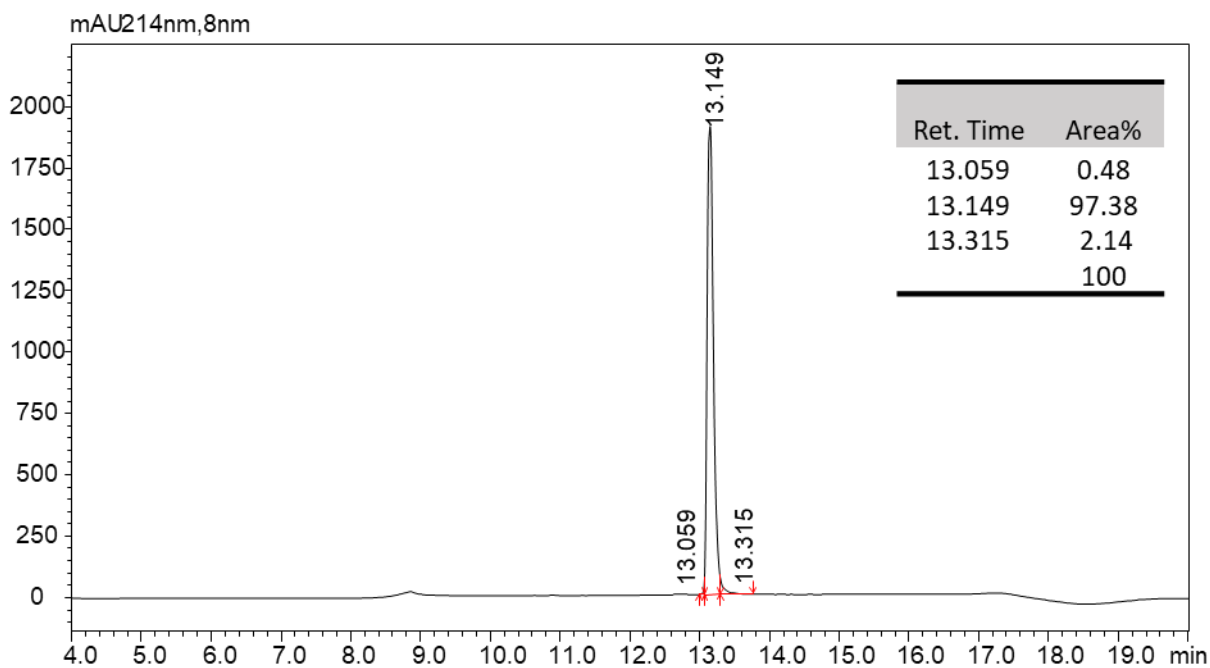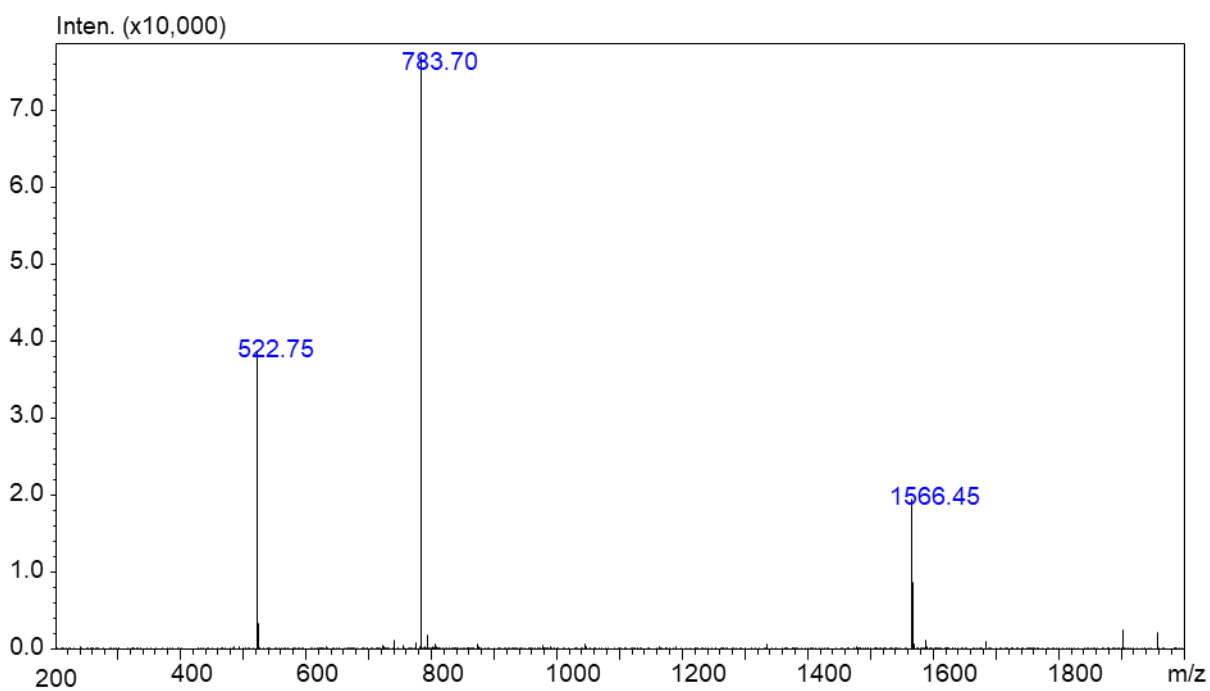

**Figure S15.** LC-MS Profile for peptide **21**. (A) LC profile at 214 nm. (B) MS spectrum of the peak at 13.14 min.

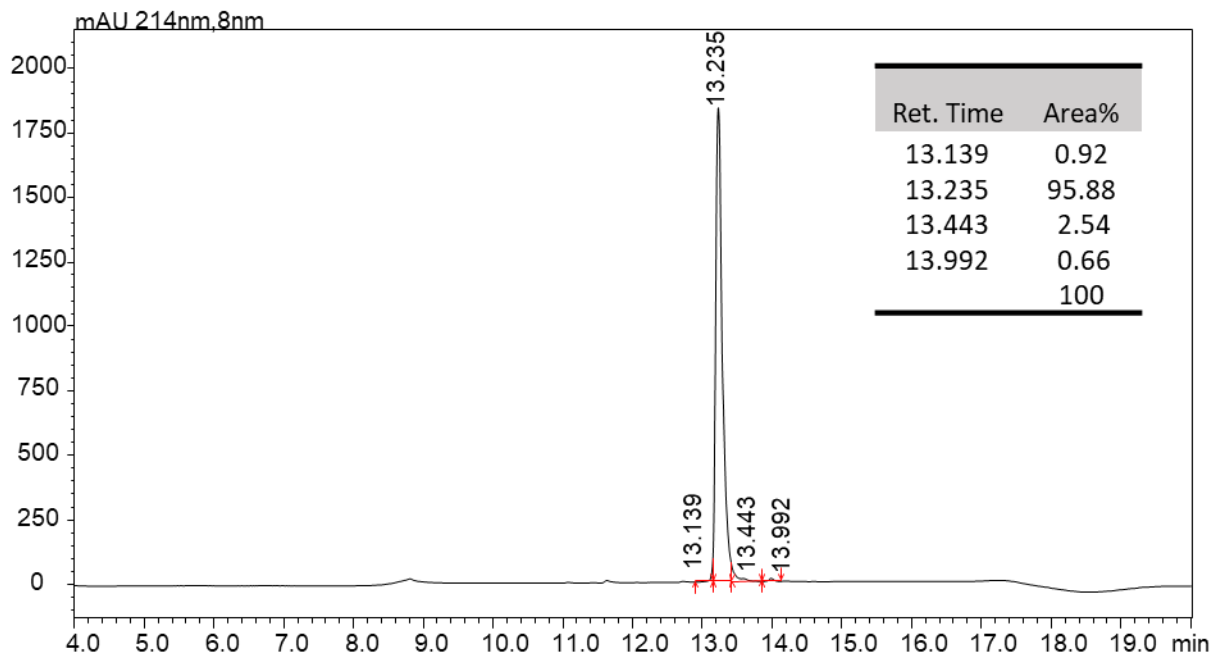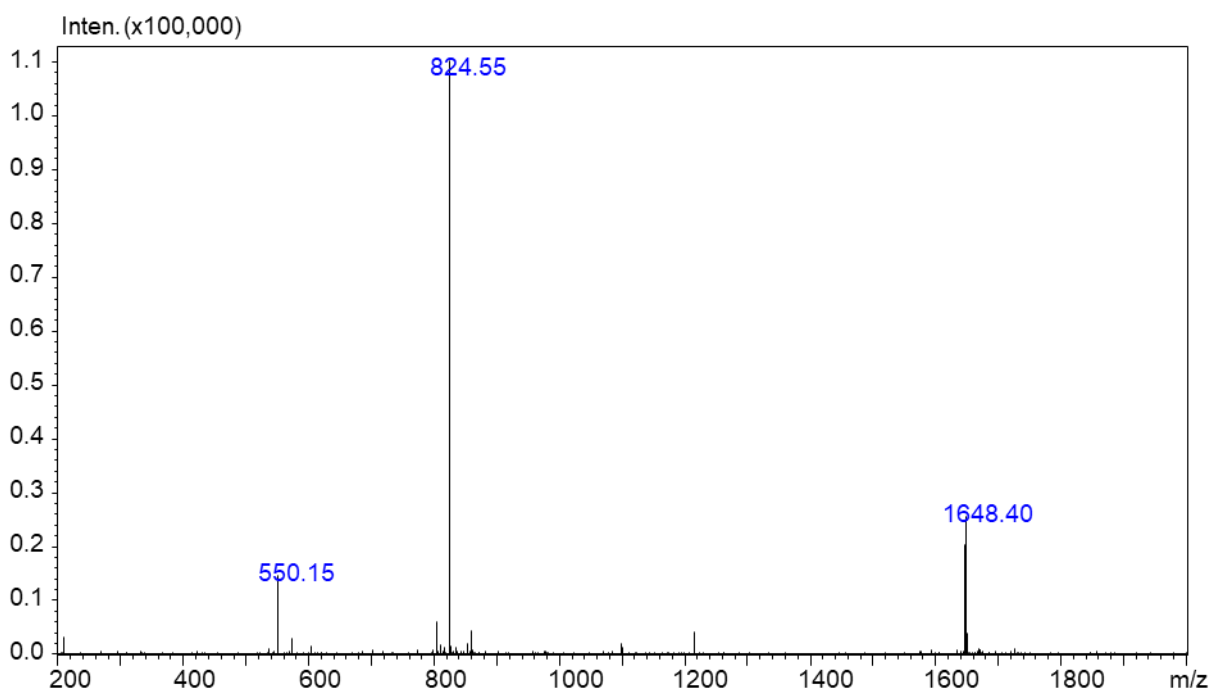

**Figure S16.** LC-MS Profile for peptide **22**. (A) LC profile at 214 nm. (B) MS spectrum of the peak at 13.23 min.

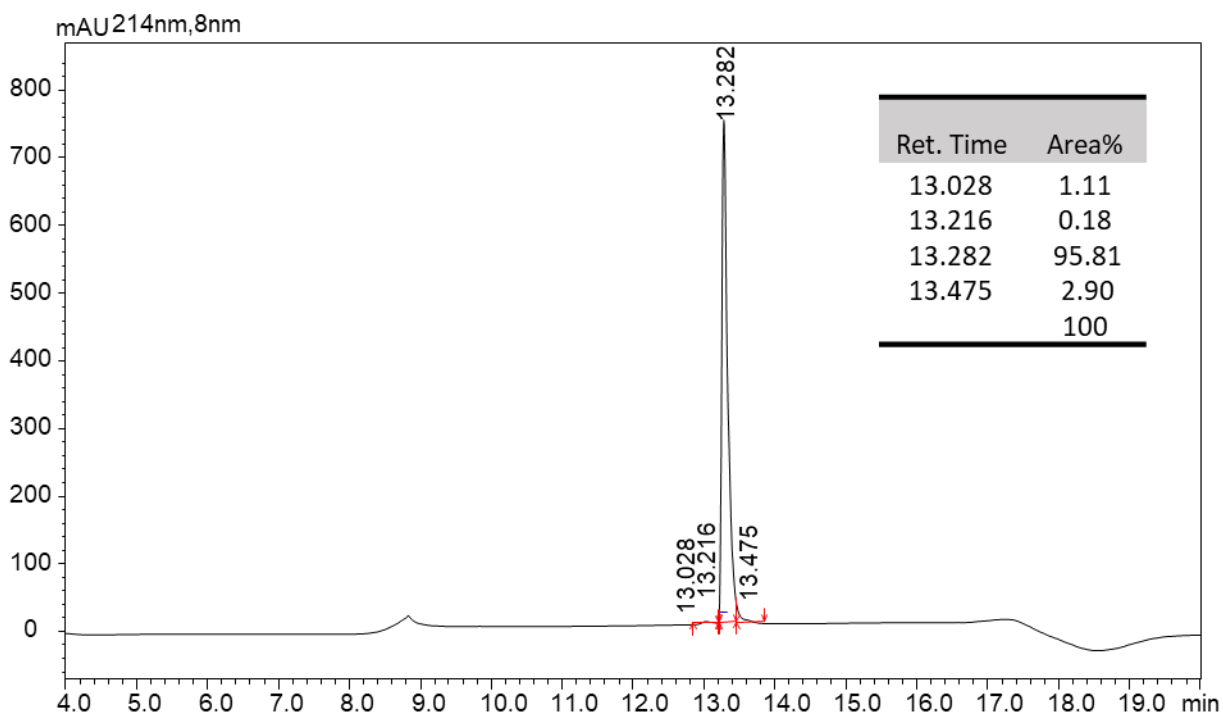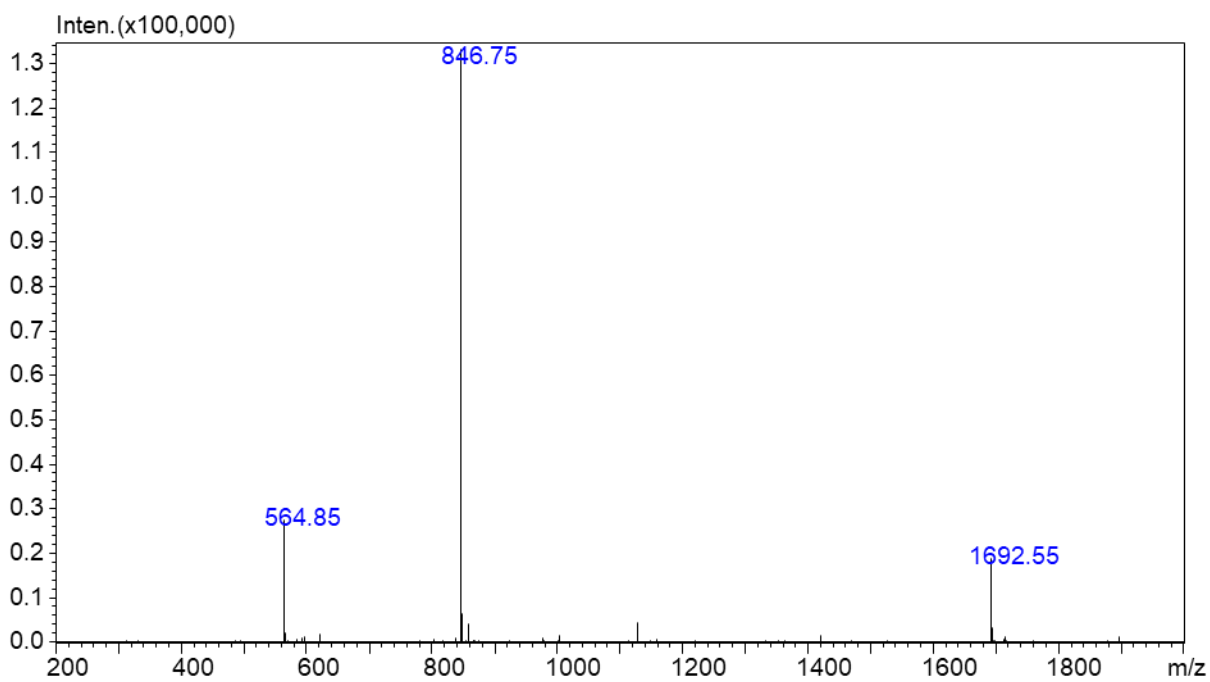

**Figure S17.** LC-MS Profile for peptide **23**. (A) LC profile at 214 nm. (B) MS spectrum of the peak at 13.28 min.

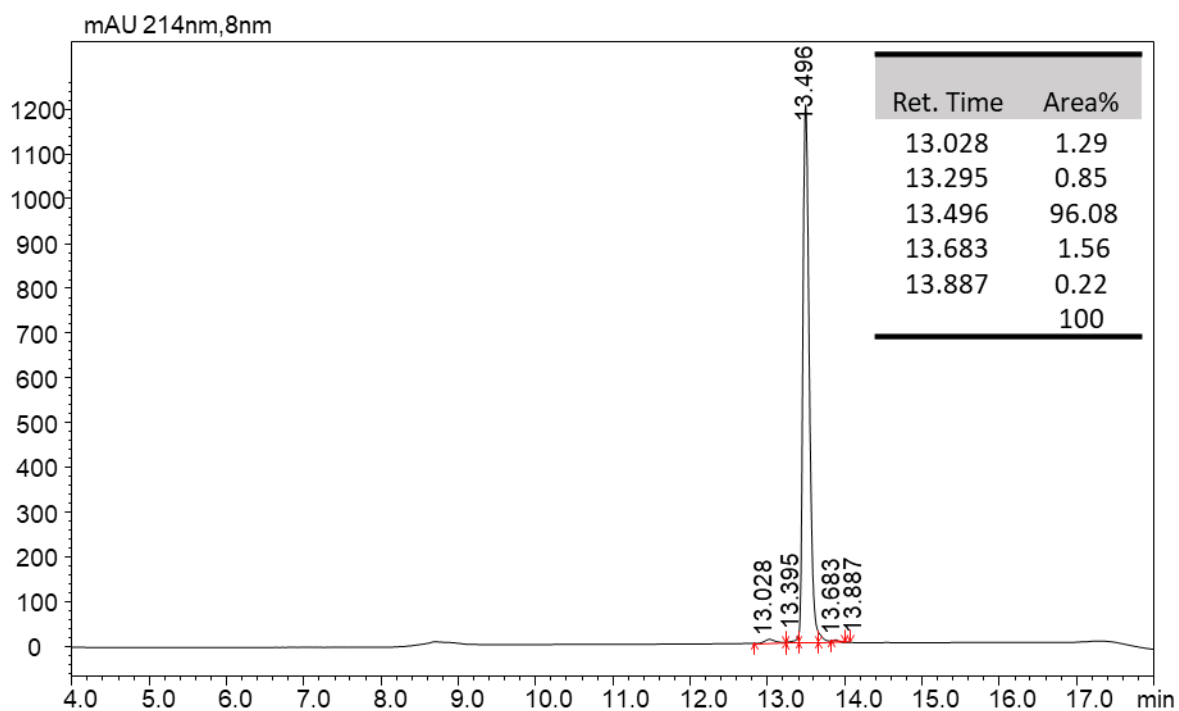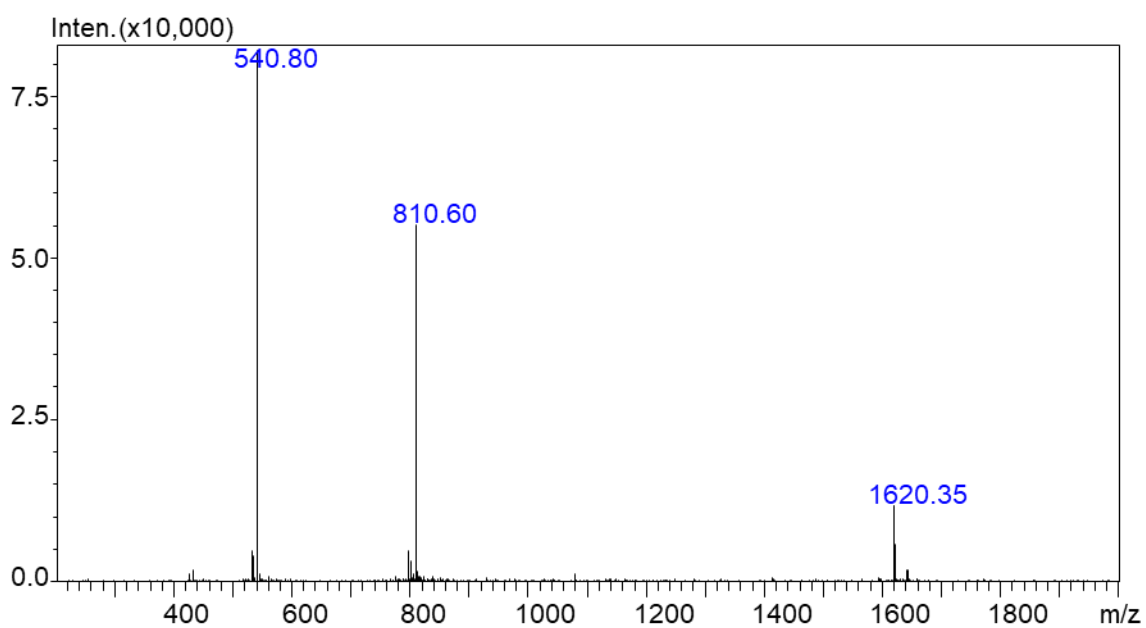

**Figure S18.** LC-MS Profile for peptide **24**. (A) LC profile at 214 nm. (B) MS spectrum of the peak at 10.75 min.



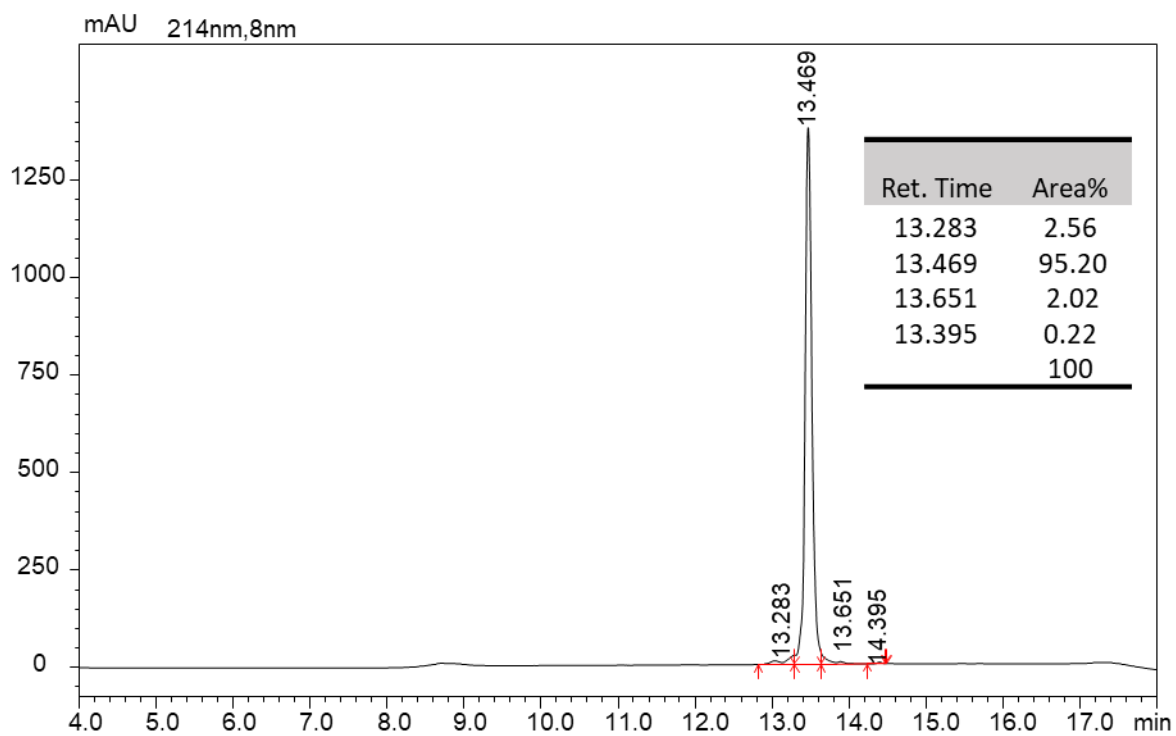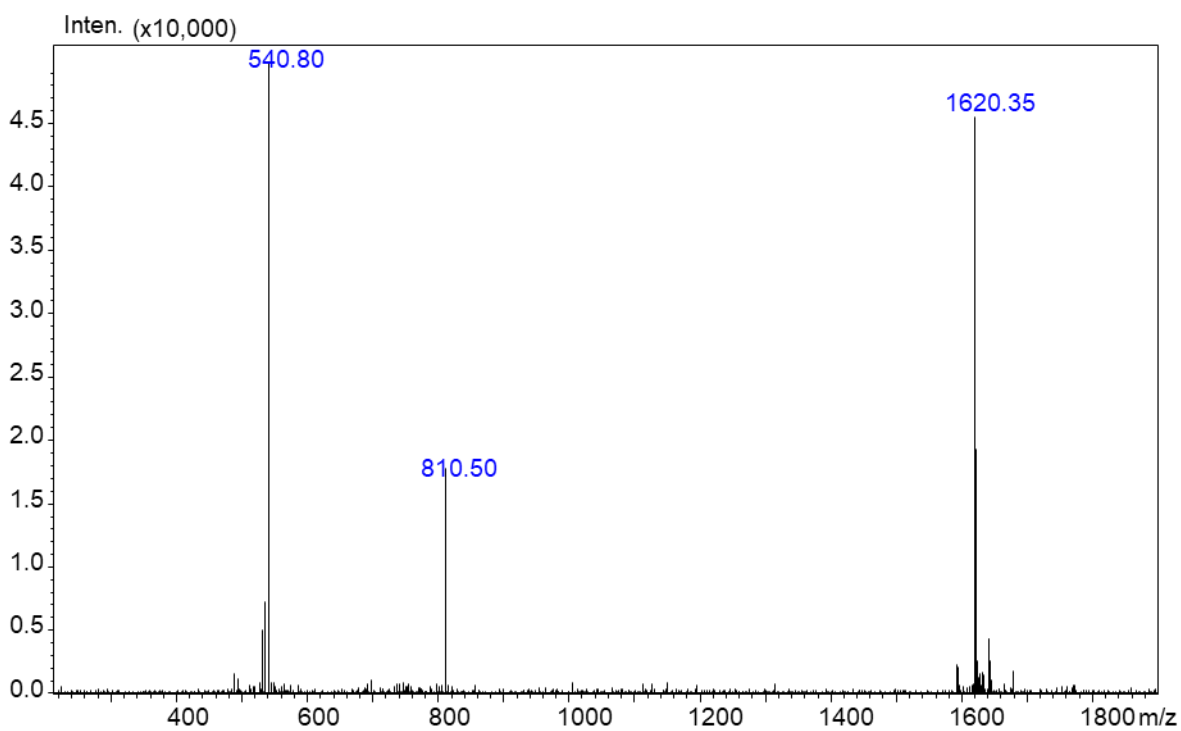

**Figure S19.** LC-MS Profile for peptide **25**. (A) LC profile at 214 nm. (B) MS spectrum of the peak at 10.71 min.

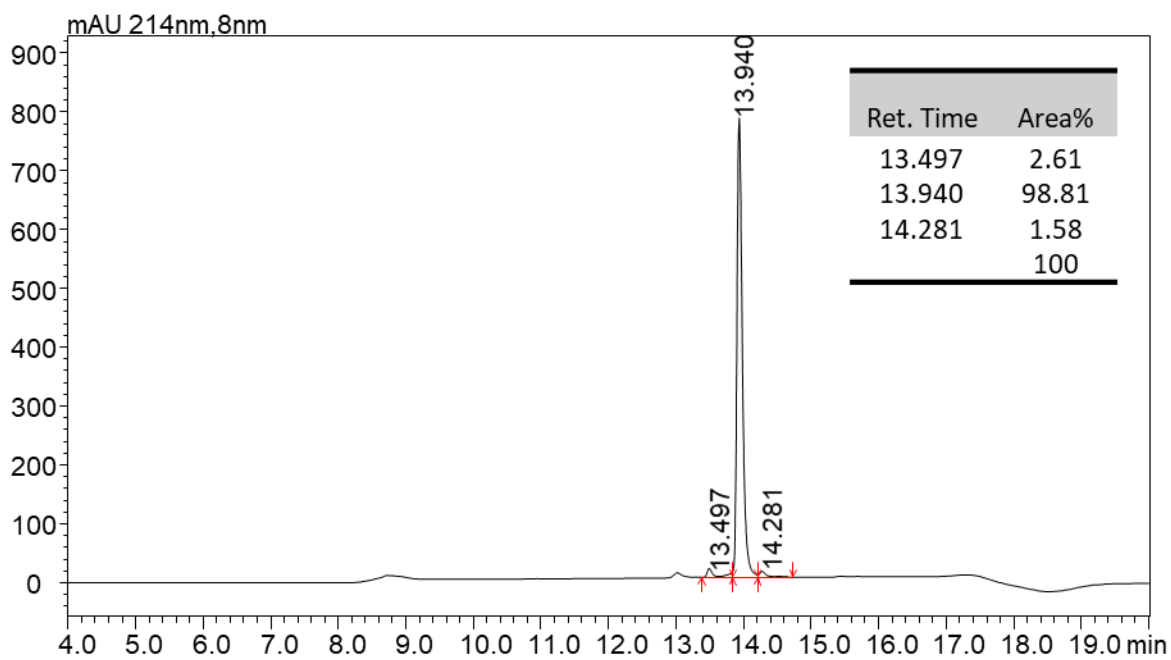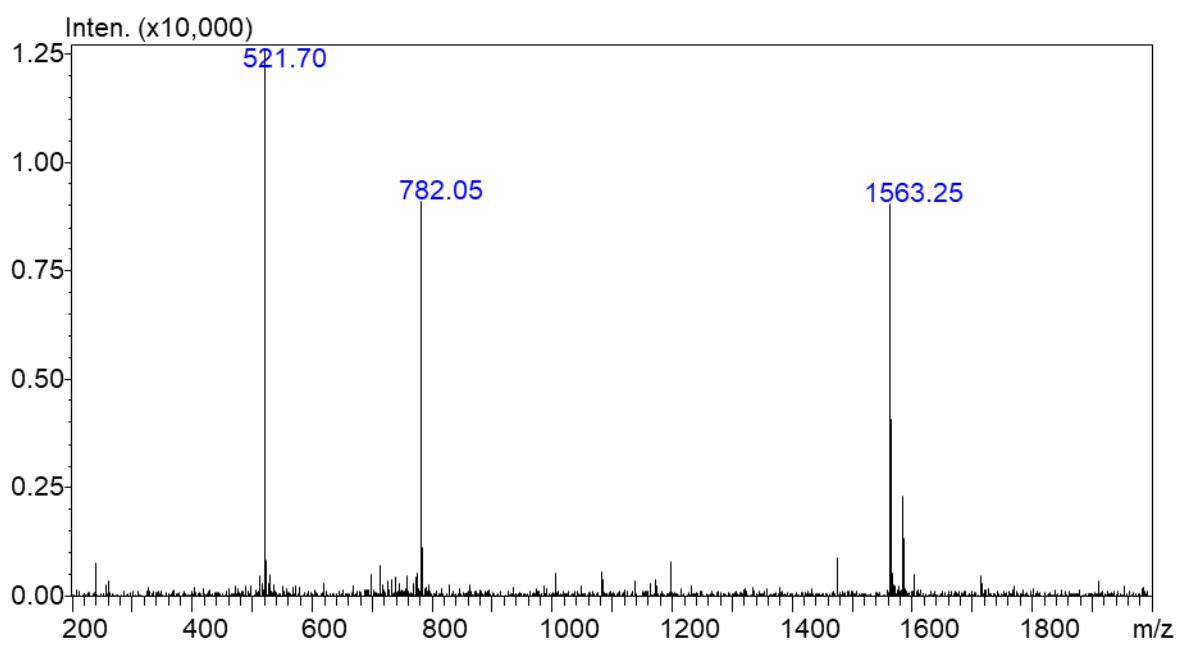

**Figure S20.** LC-MS Profile for peptide **26**. (A) LC profile at 214 nm. (B) MS spectrum of the peak at 13.94 min.

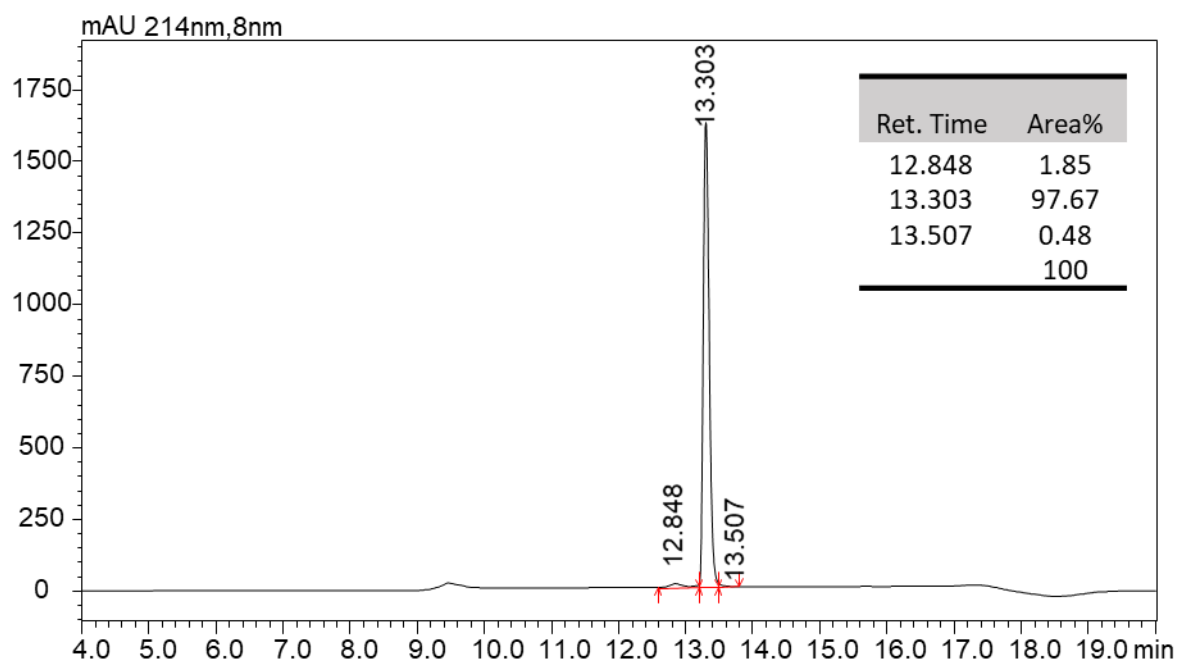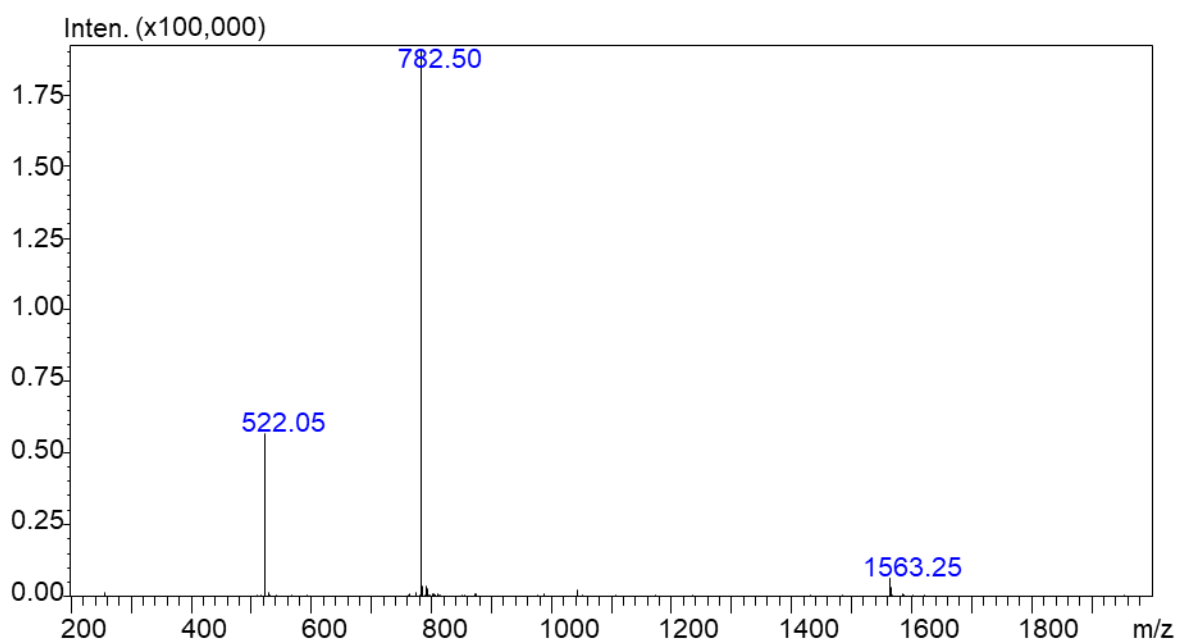

**Figure S21.** LC-MS Profile for peptide **27**. (A) LC profile at 214 nm. (B) MS spectrum of the peak at 13.30 min.

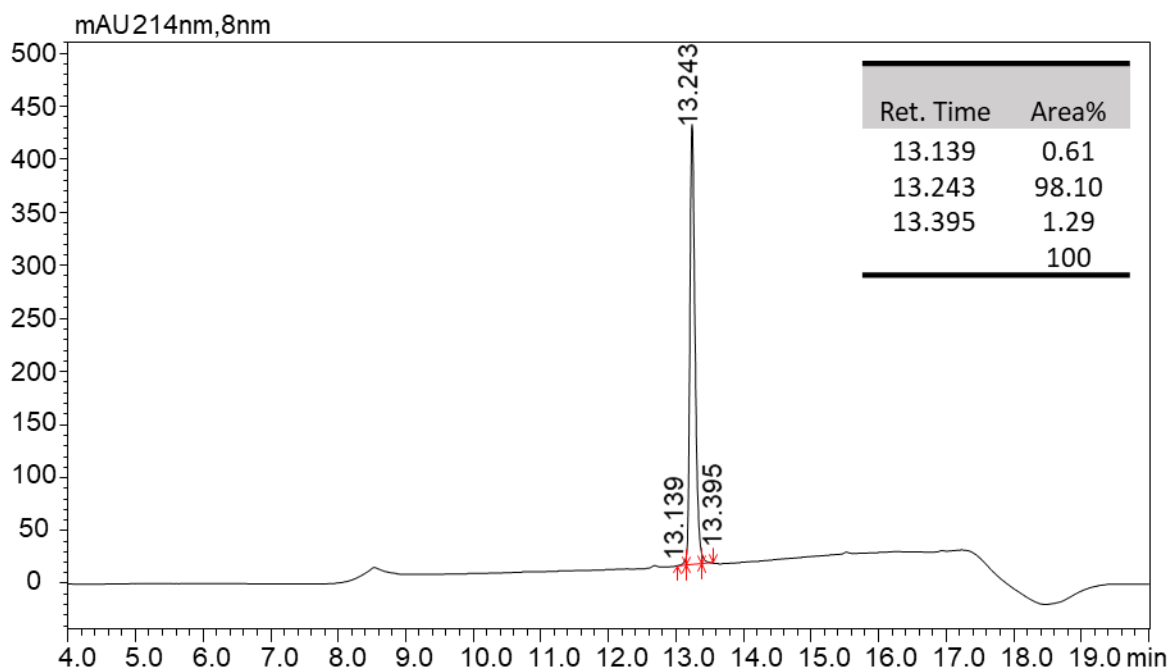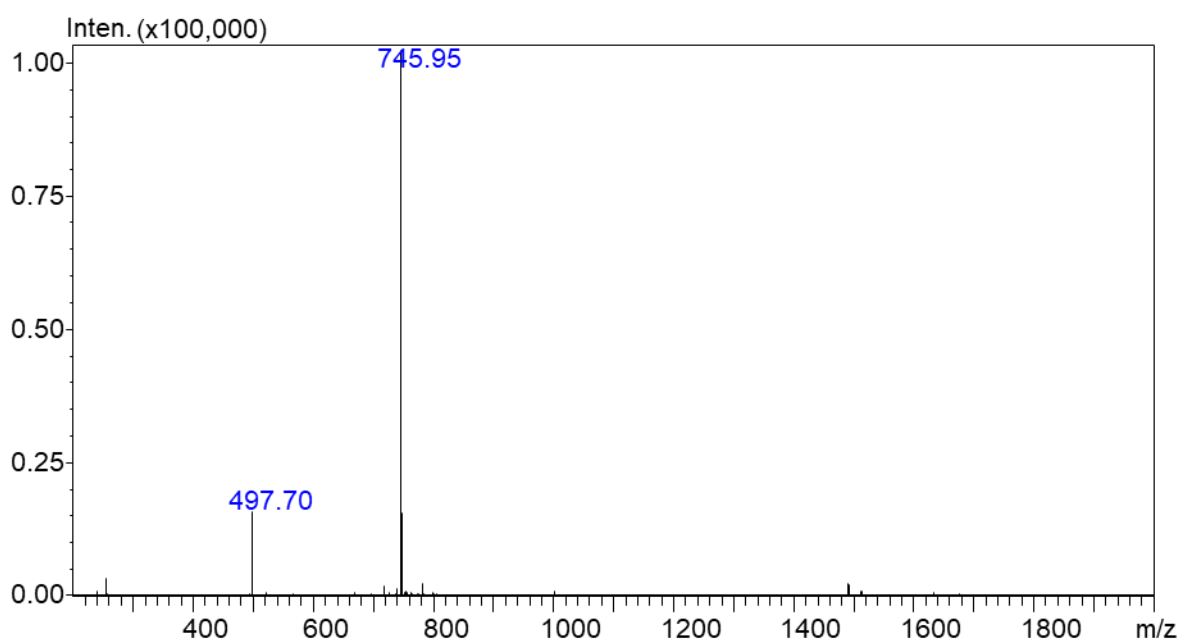

**Figure S22.** LC-MS Profile for peptide **28**. (A) LC profile at 214 nm. (B) MS spectrum of the peak at 13.24 min.

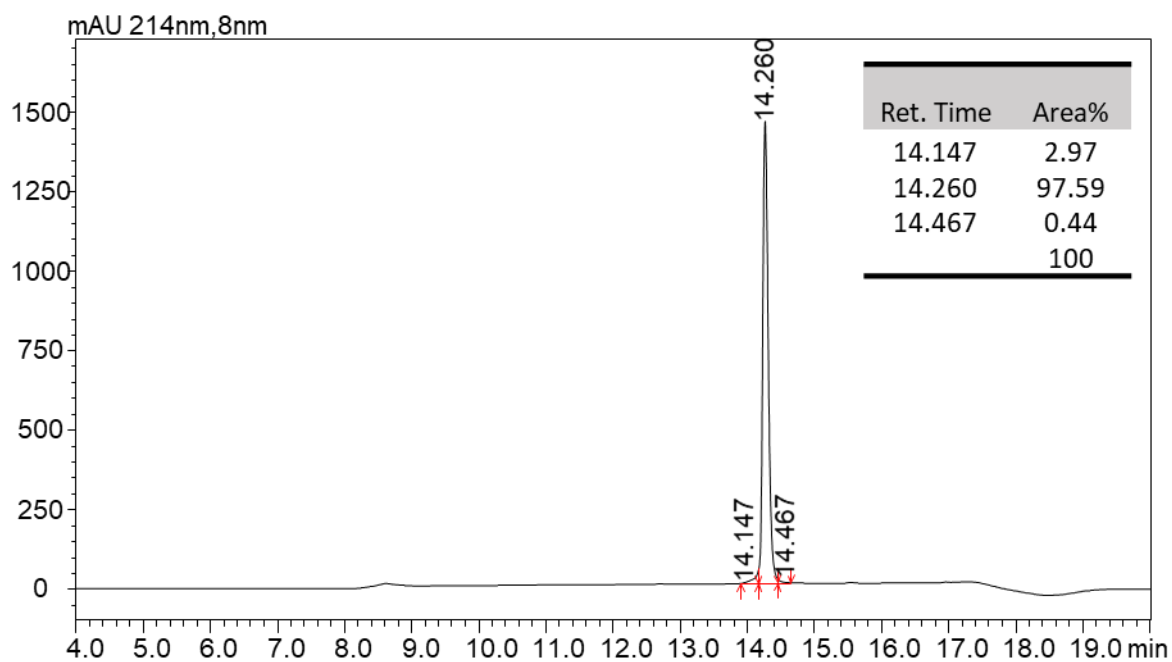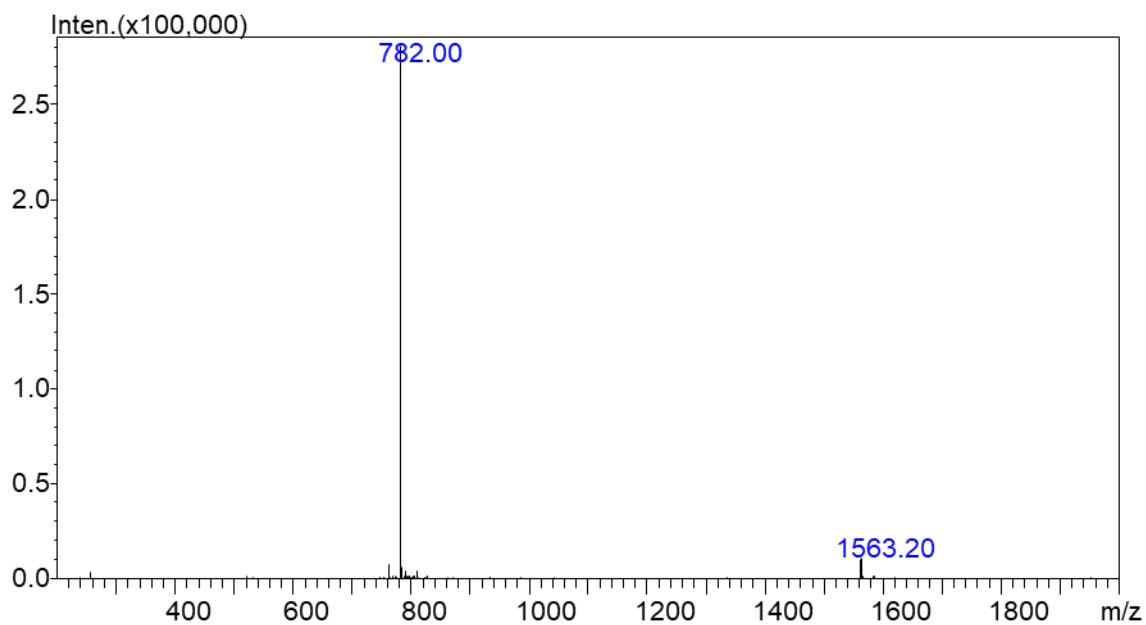

**Figure S23.** LC-MS Profile for peptide **29**. (A) LC profile at 214 nm. (B) MS spectrum of the peak at 14.26 min.

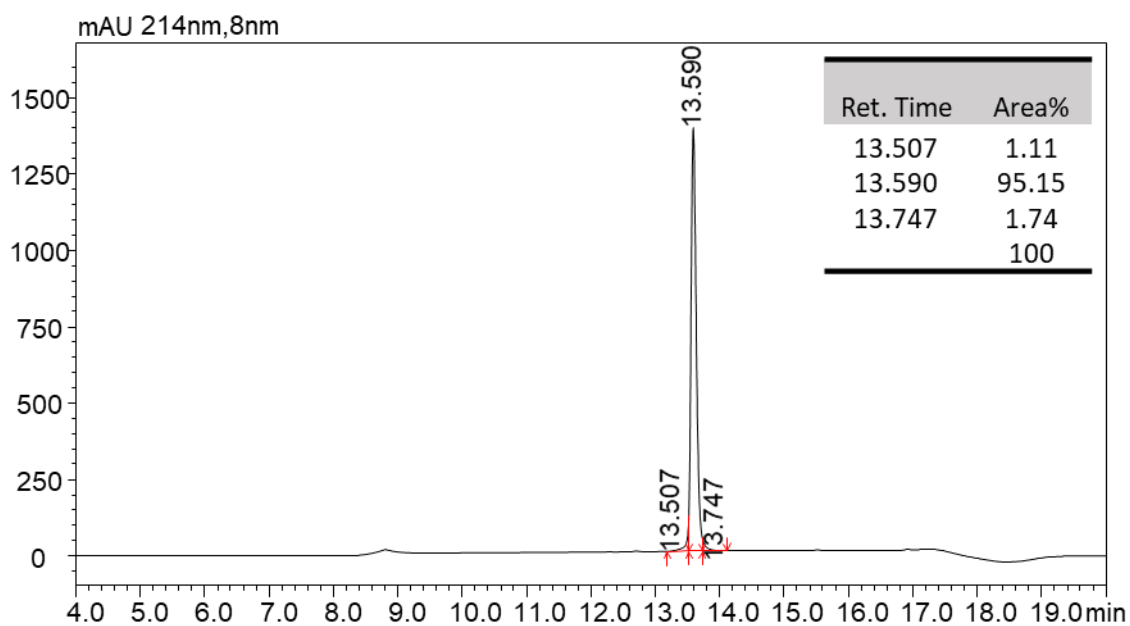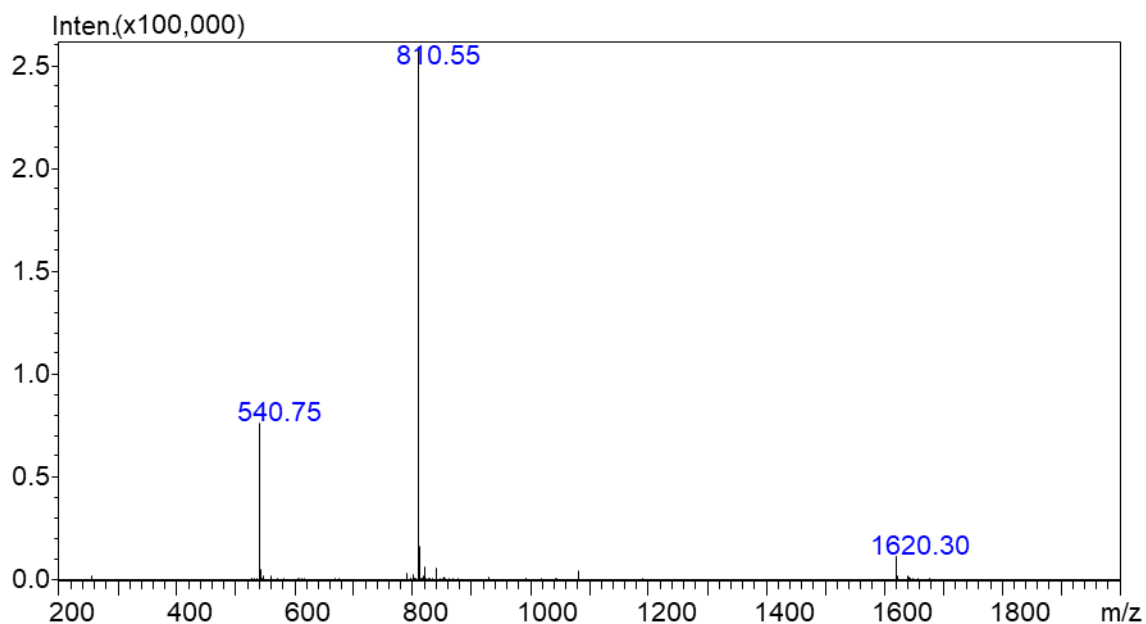

**Figure S24.** LC-MS Profile for peptide **30**. (A) LC profile at 214 nm. (B) MS spectrum of the peak at 13.59 min.

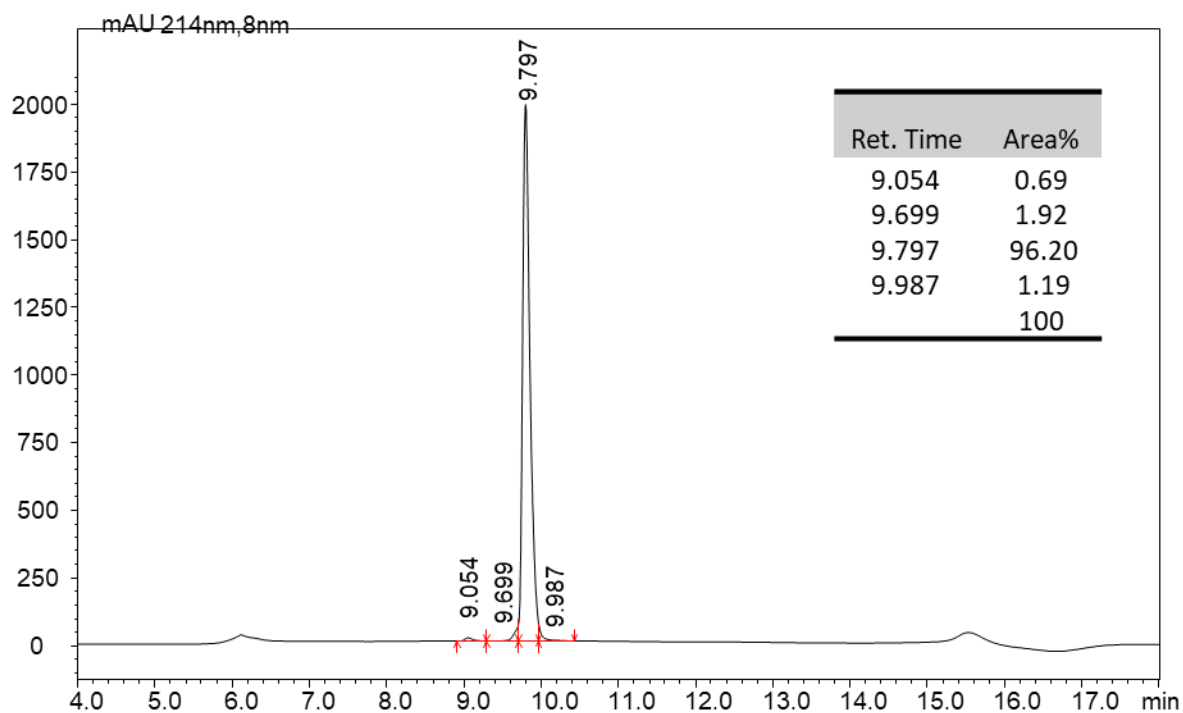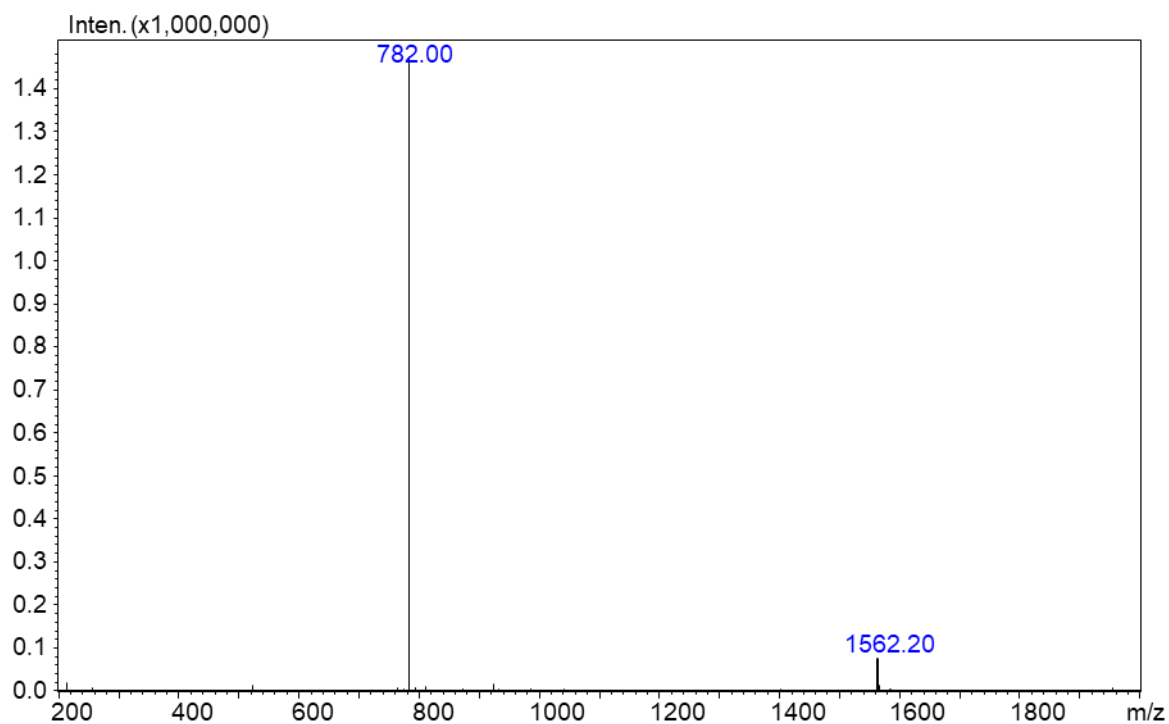

**Figure S25.** LC-MS Profile for peptide **31**. (A) LC profile at 214 nm. (B) MS spectrum of the peak at 9.79 min.

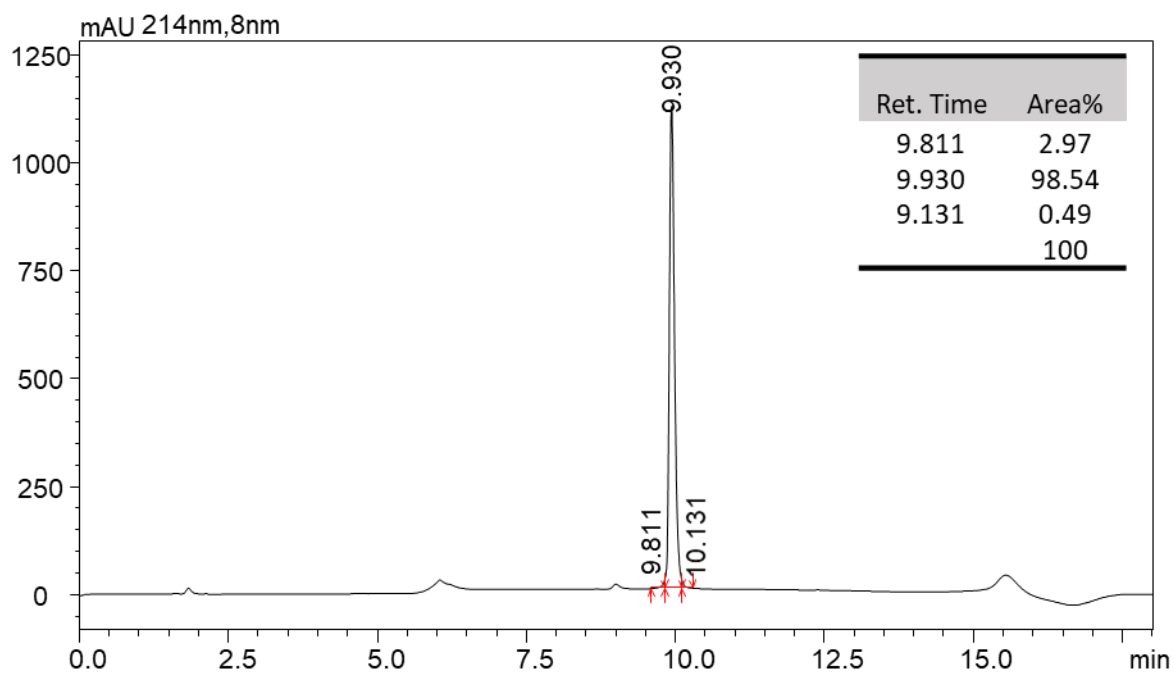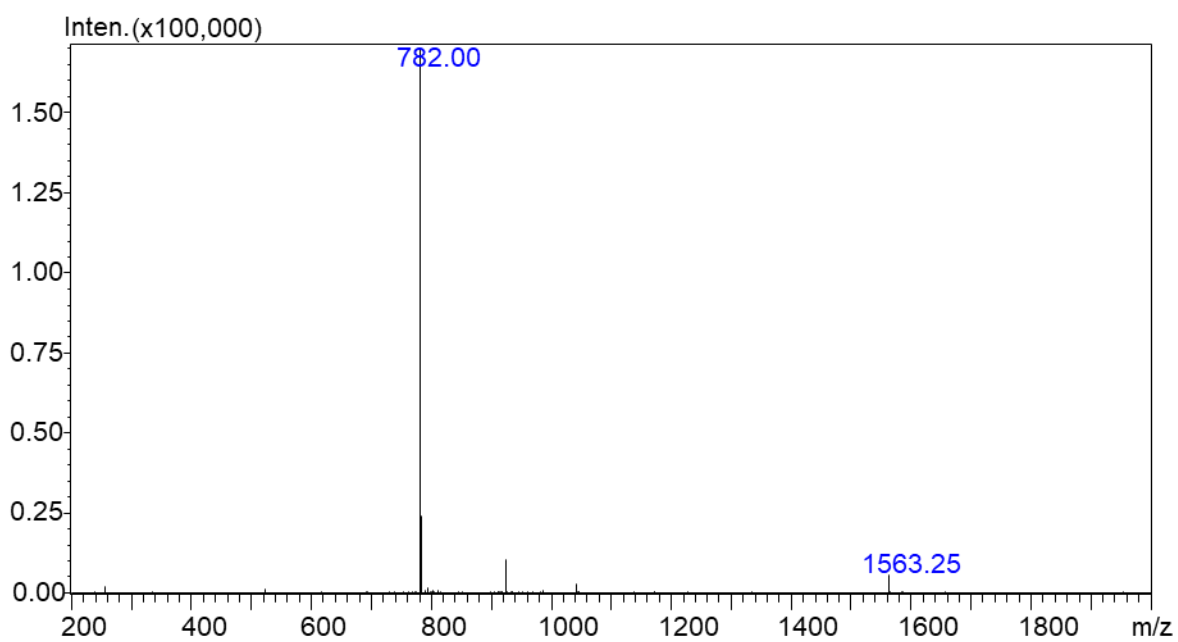

**Figure S26.** LC-MS Profile for peptide **32**. (A) LC profile at 214 nm. (B) MS spectrum of the peak at 9.93 min.



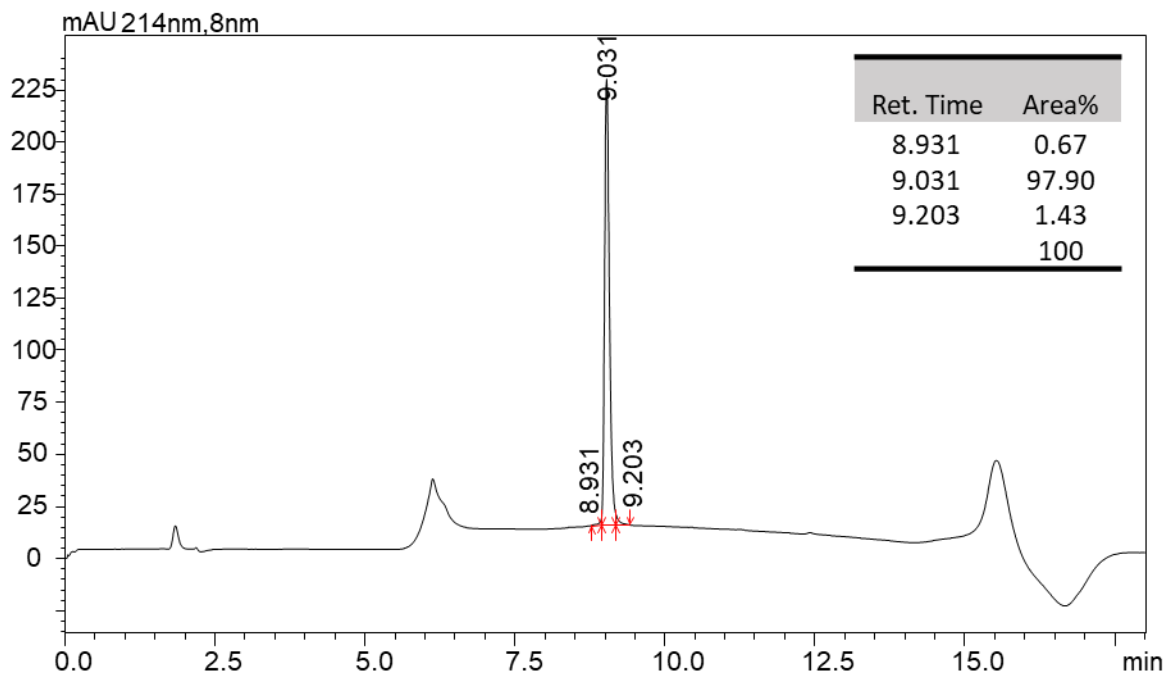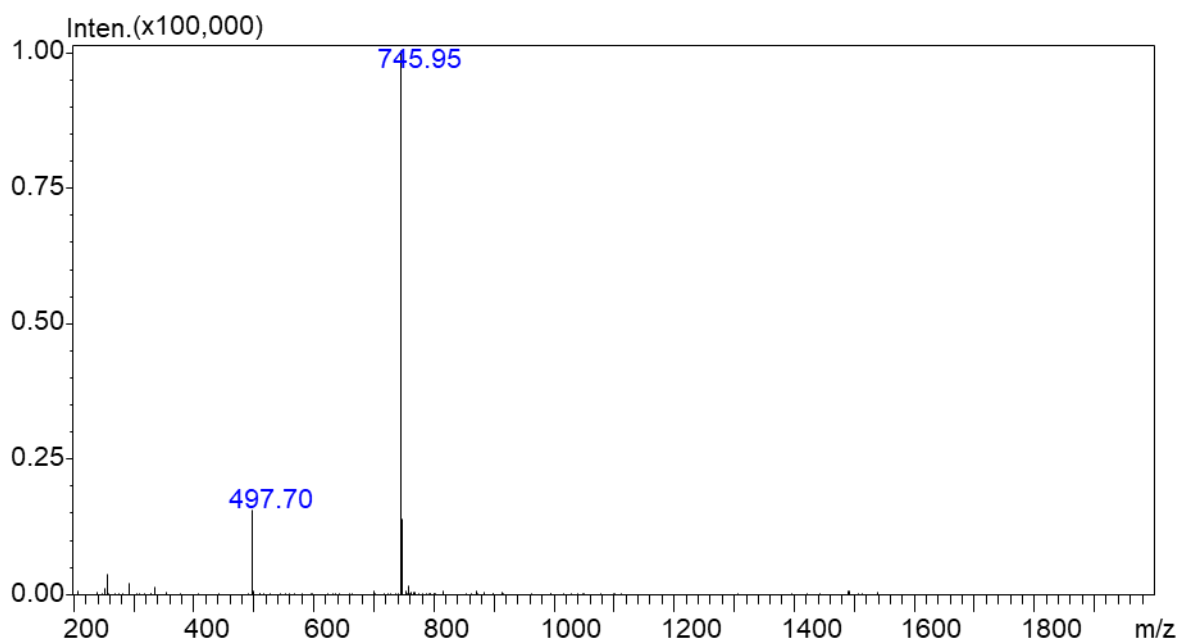

**Figure S27.** LC-MS Profile for peptide **33**. (A) LC profile at 214 nm. (B) MS spectrum of the peak at 9.03 min.

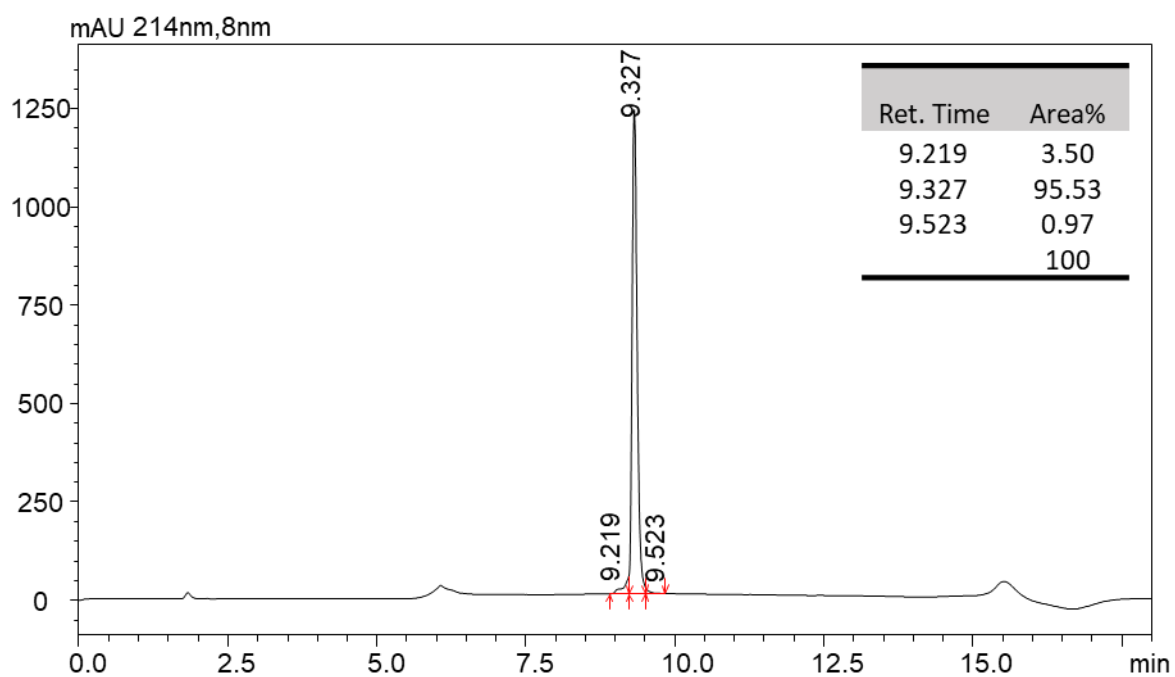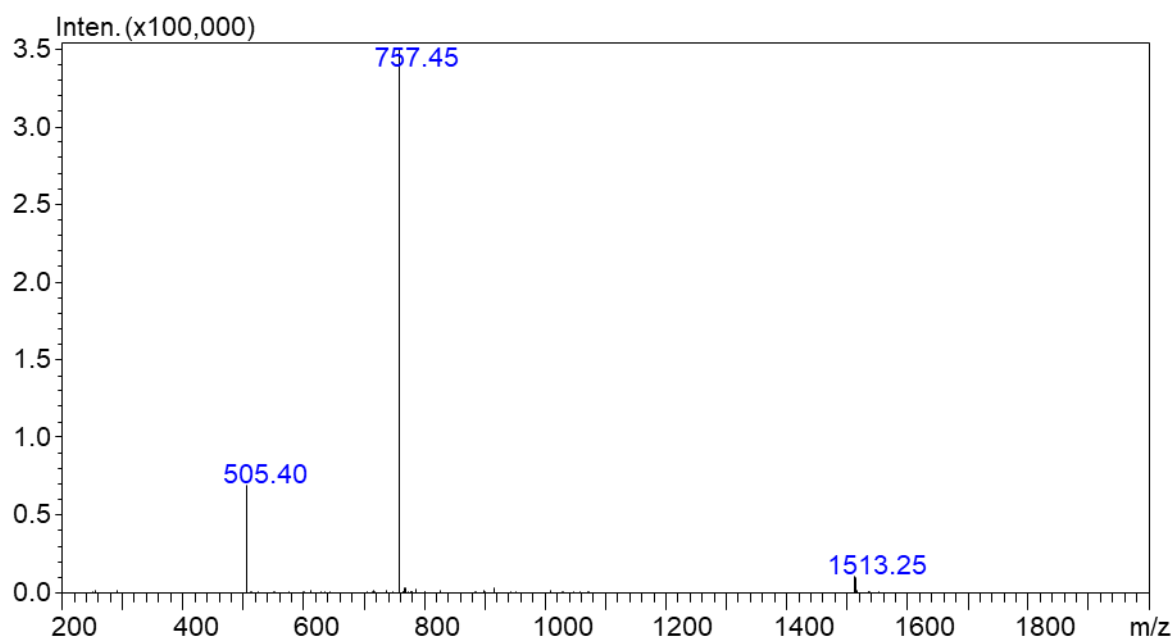

**Figure S28.** LC-MS Profile for peptide **34**. (A) LC profile at 214 nm. (B) MS spectrum of the peak at 9.33 min.

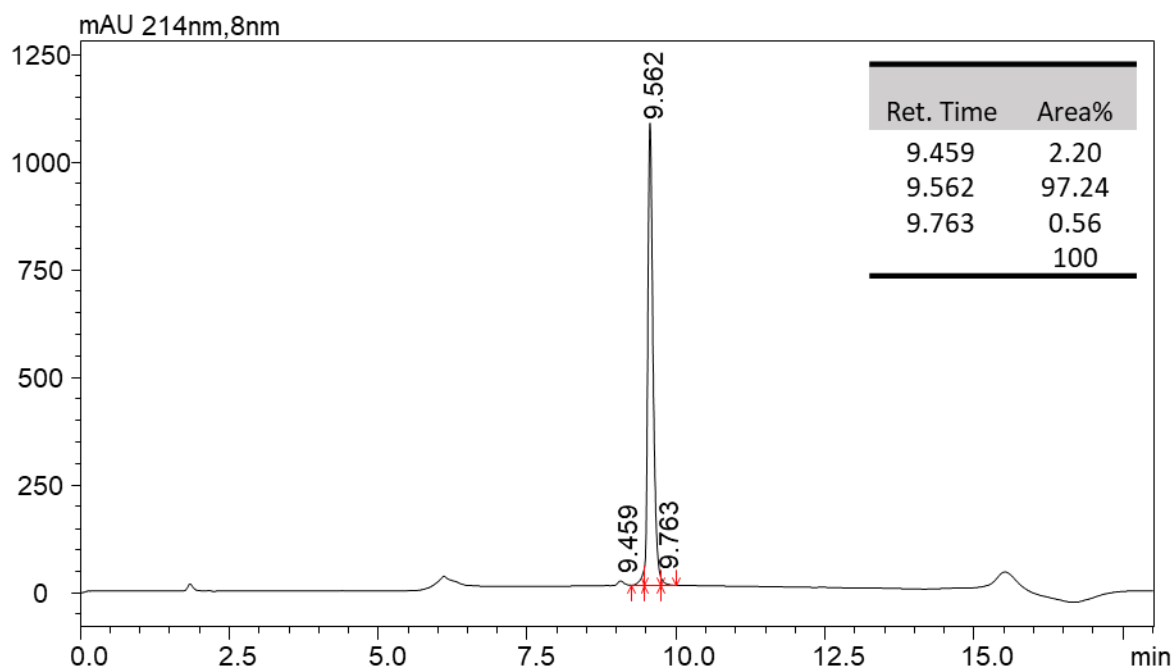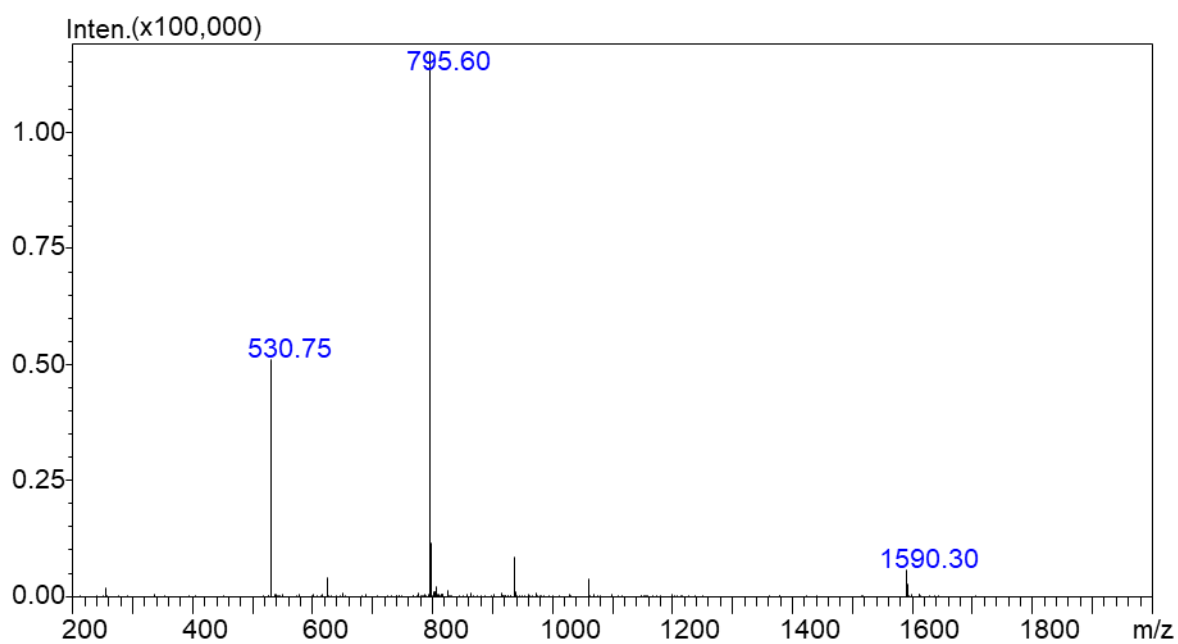

**Figure S29.** LC-MS Profile for peptide **35** (A) LC profile at 214 nm. (B) MS spectrum of the peak at 9.56 min.

**Table S1:** MICs against *P. aeruginosa* (Pa) PAO1 and PAO1R\* strains

| Peptide                  | Pa PAO1 | Pa PAO1R |
|--------------------------|---------|----------|
| Poly B                   | 0.5     | 16       |
| Laterocidine (peptide 1) | 8       | 8        |
| Peptide 11               | 2       | 2        |

\*The polymyxin-resistant paired strain of PAO1.

**Table S2:** MIC against *A. baumannii* 5075 strains

| Peptide                  | <i>A. baumannii</i> 5075 S | <i>A. baumannii</i> 5075 R | <i>A. baumannii</i> 5075 D |
|--------------------------|----------------------------|----------------------------|----------------------------|
| Laterocidine (peptide 1) | 8                          | >32                        | >32                        |
| Peptide 11               | 8                          | 32                         | 32                         |

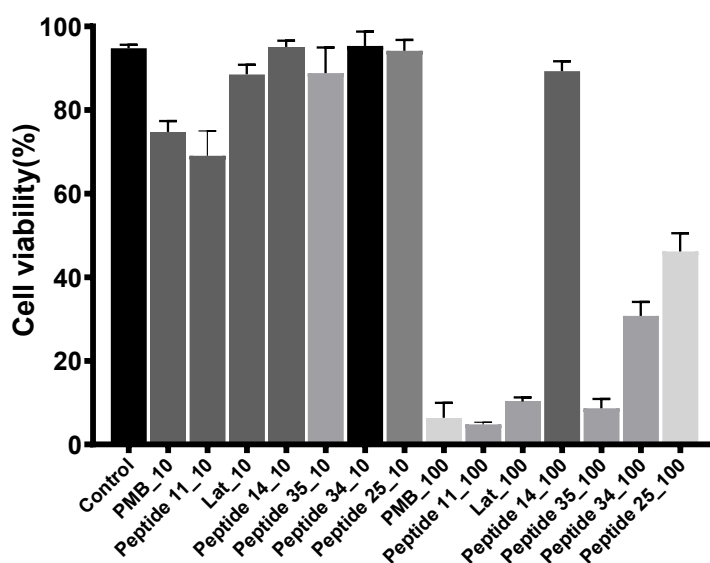

**Figure S30.** Cell viability of HK-2 cells after 24 h of treatment with polmyxin B (PMB) or laterocidine (Lat) and its analogues (Peptides 11, 14, 25, 34, and 35) at concentrations of 0.01 mM and 0.1 mM (Mean  $\pm$  SD; n = 3).

**NMR Data:**

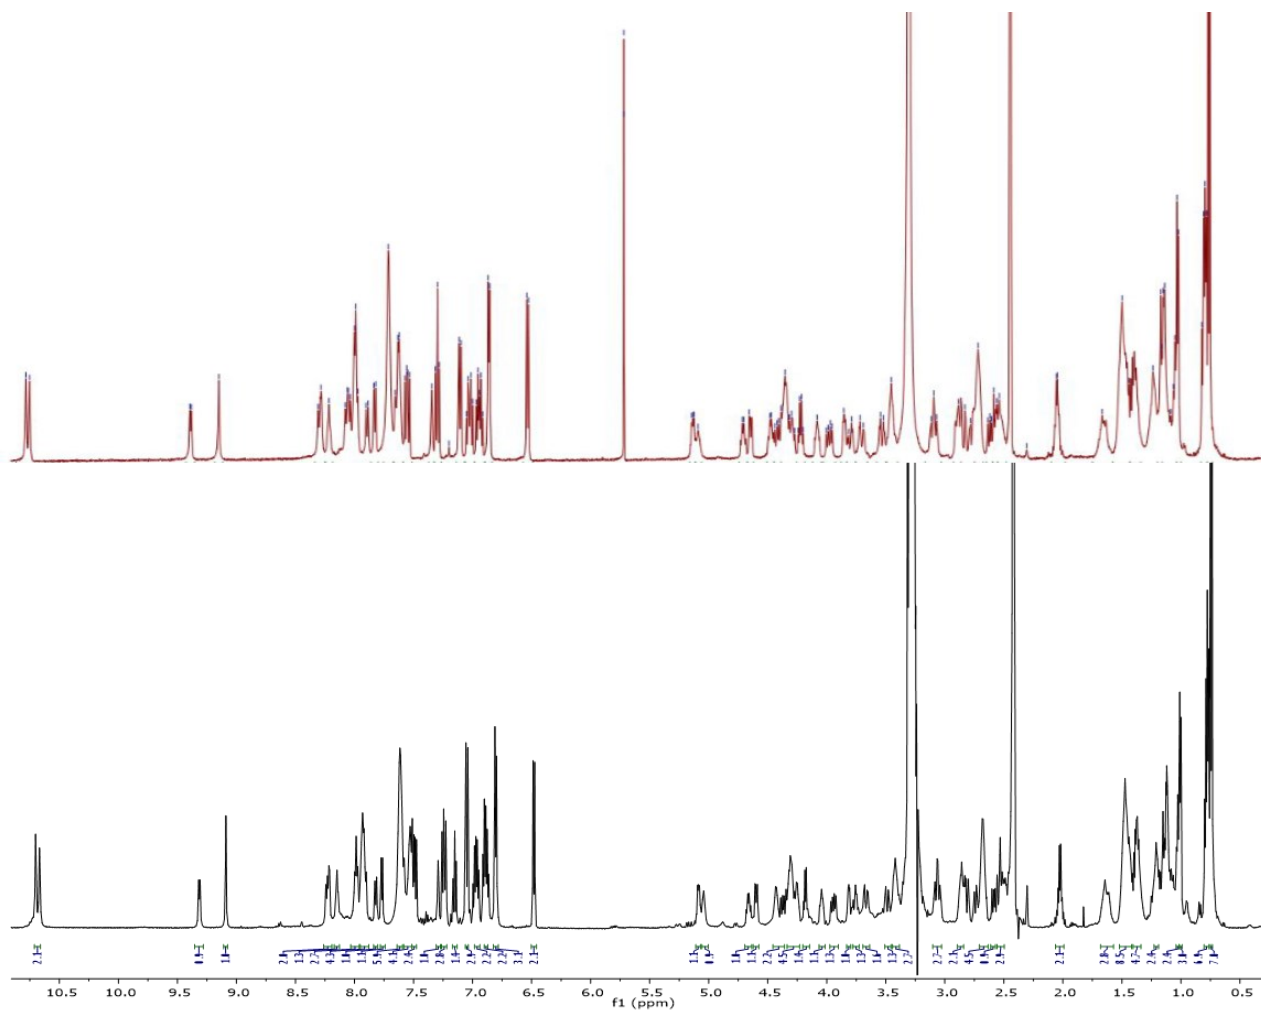

**Figure S31.** Overlay of literature laterocidine NMR(Black) and chemically synthesized laterocidine NMR (Brown)  $^1\text{H}$  NMR (600 MHz, DMSO  $d_6$ ).

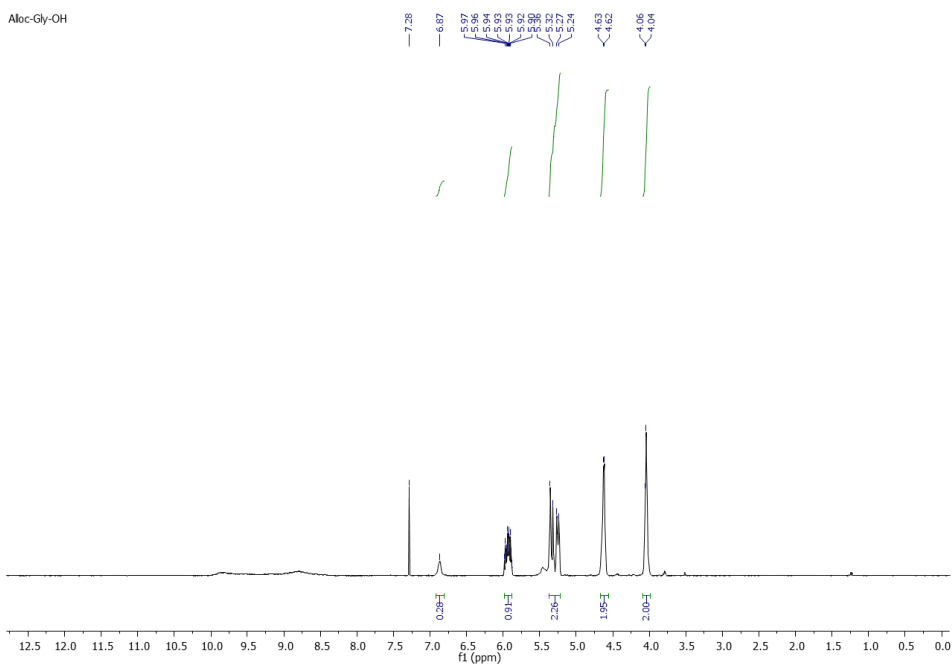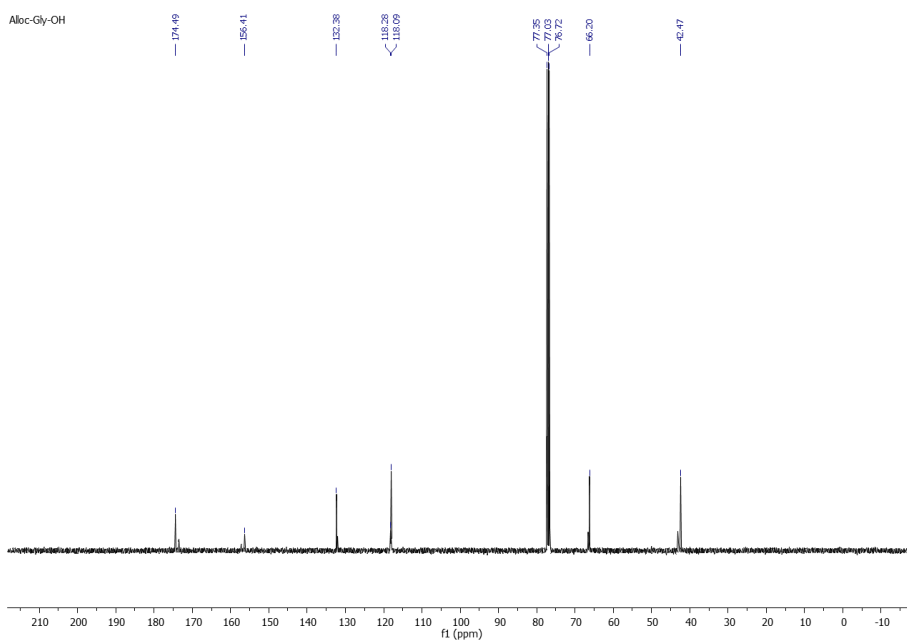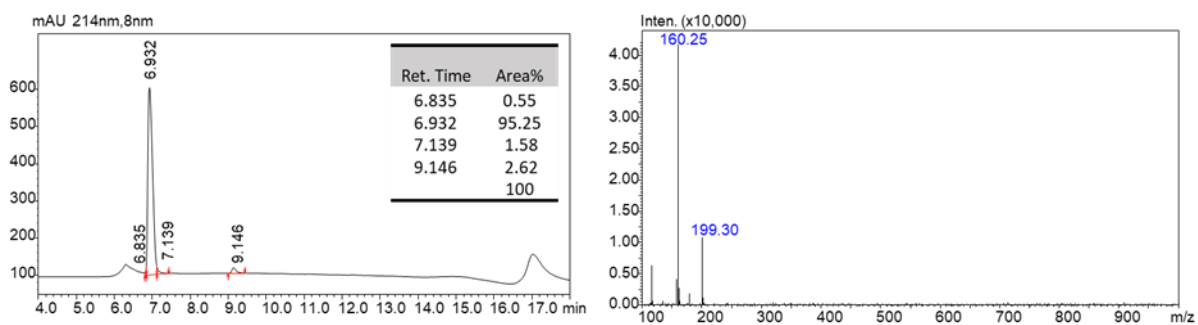

Figure S32.  $^1\text{H}$  NMR,  $^{13}\text{C}$  NMR and LC-MS of Alloc-Gly-OH

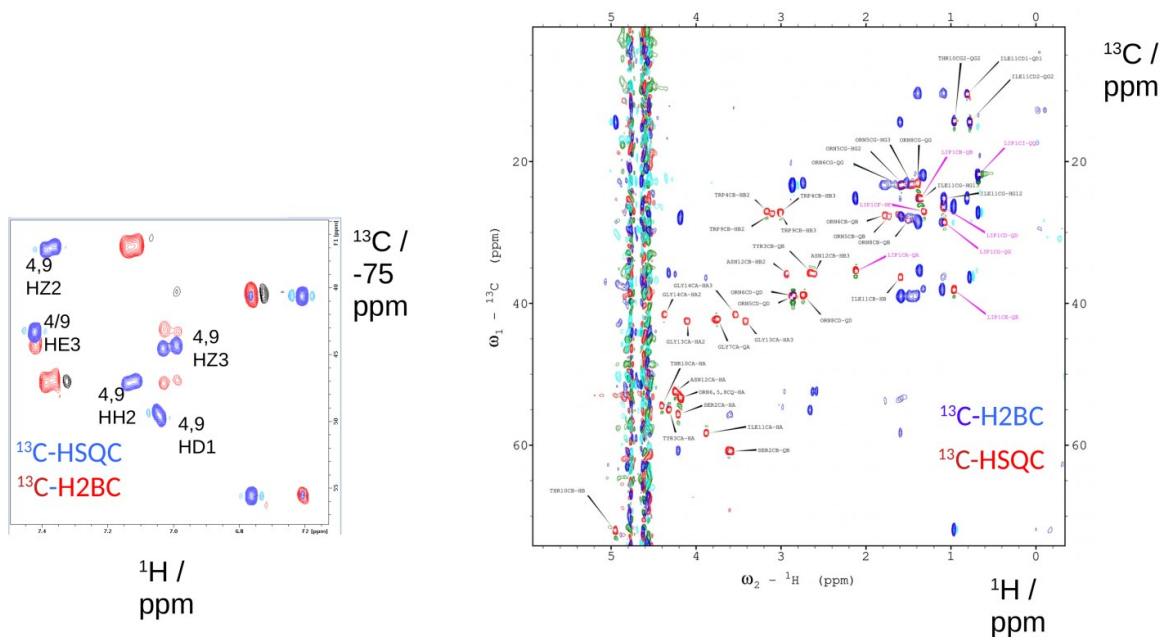

**Figure S33.** Superposition of 2D  $^{13}\text{C}$  HSQC and 2D  $^{13}\text{C}$  H2BC spectra of 1.5 mM laterocidine recorded at 23 °C in 50 mM acetate buffer ( $\text{d}_3$ ), 10%  $\text{D}_2\text{O}$ , pH 4.5 showing the assignments of the aliphatic (right) and aromatic peaks (left). The aromatic region is folded by a 75 ppm  $^{13}\text{C}$  sweep width requiring this to be added to the observed chemical shifts. Note that the numbering shown here starts with the lipid as residue 1, i.e., Lip1, D-Ser2, D-Tyr3, D-Trp4, Orn5, D-Orn6, Gly7, Orn8, Trp9, Thr10, Ile11, Asn12, Gly13, Gly14.

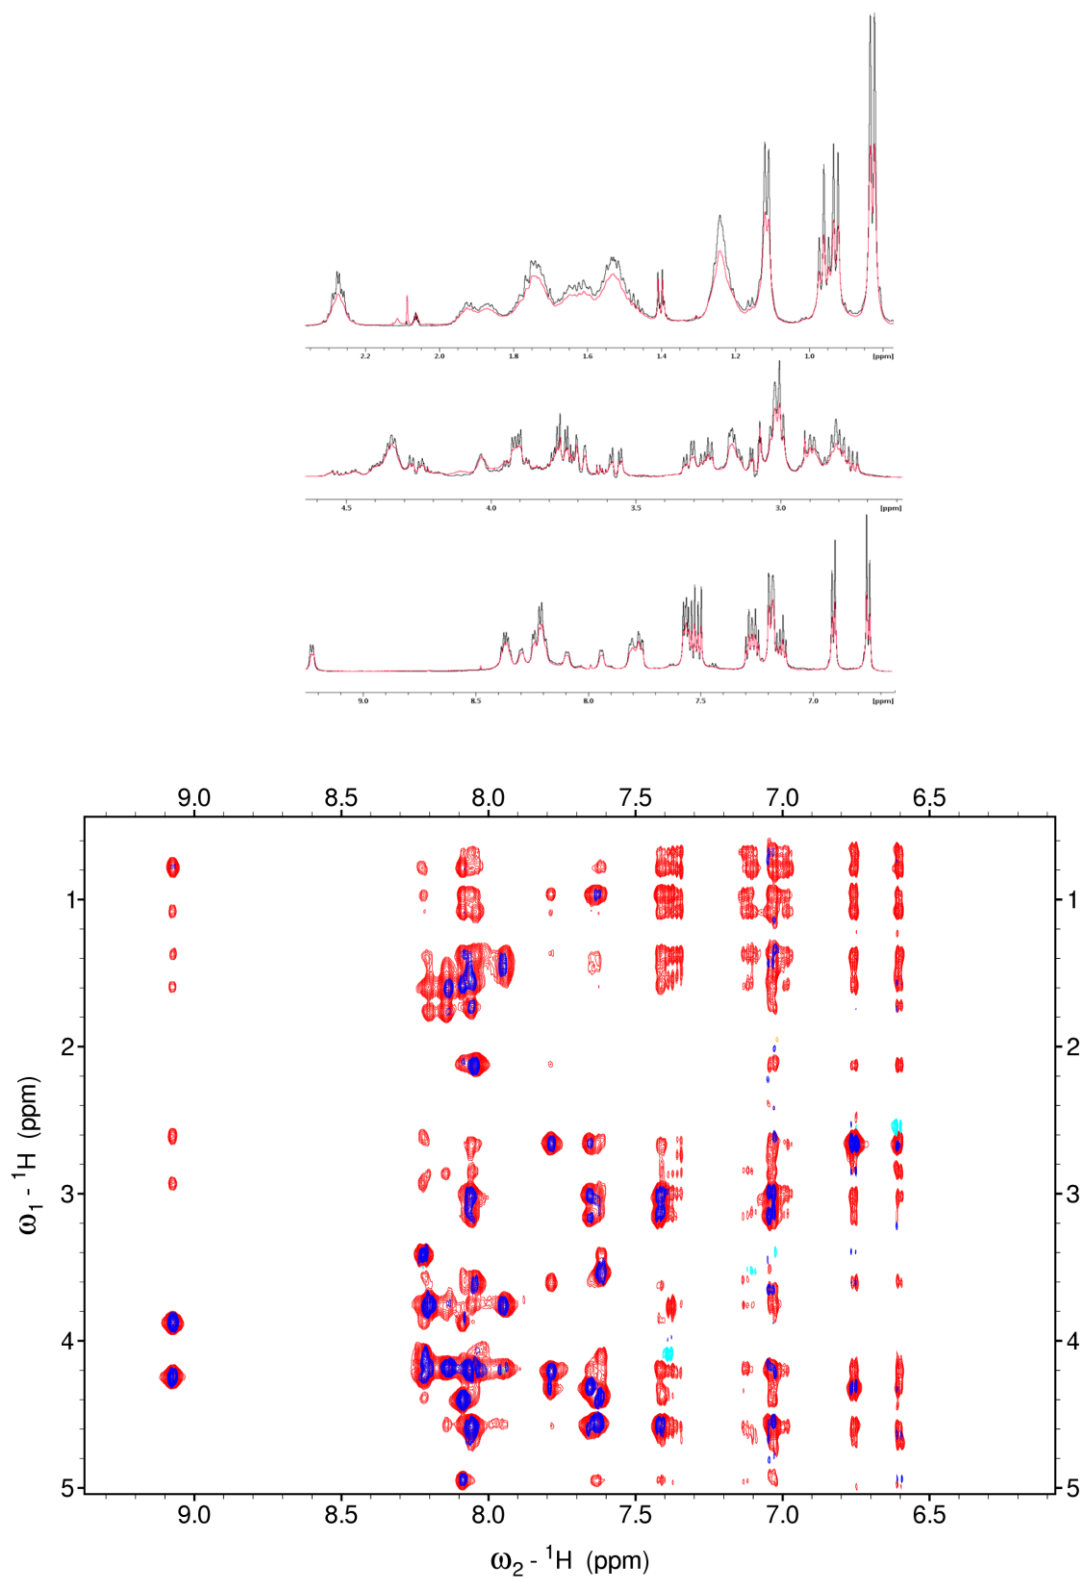

**Figure S34.** Top: Amide/aromatic region of the  $^1\text{H}$  NMR spectrum during a titration of 1.5mM Nat (blue) after the addition of 16  $\mu\text{L}$  (red) of 10 mg/mL *E. coli* O111:B4 LPS. Bottom: Superposition of 2D NOESY spectra of 1.5 mM laterocidine (red) and after addition of *E.coli* LPS O111:B4 (black), both recorded at 23  $^\circ\text{C}$  in 50 mM acetate buffer (d3), 10% D2O, pH 4.5. The 2D NOESY mixing times were 100 ms and the experiment times were 1.5 h.





laterocidine when bound to LPS. The experiment time was 4.5 h. Note that the numbering shown here starts with the lipid as residue 1, i.e., Lip1, D-Ser2, D-Tyr3, D-Trp4, Orn5, D-Orn6, Gly7, Orn8, Trp9, Thr10, Ile11, Asn12, Gly13, Gly14.

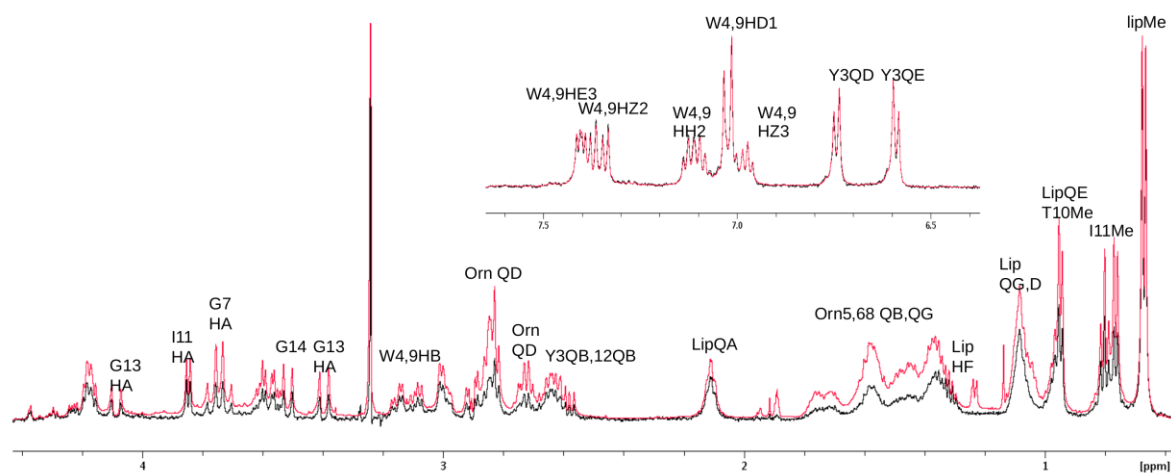

**Figure S36.** Overlay of the ‘on’  $^1\text{H}$  STD NMR experiment (red, after saturation at  $-4$  ppm for 2.5s) with the ‘off’ reference (after saturation for 2.5s at 100 ppm) recorded on a sample of 0.75 mM laterocidine after the addition of 6  $\mu\text{L}$  of 10 mg/mL *E.coli* O111:B4 LPS recorded in 50 mM Acetate( $d_3$ ), pH 4.5,  $\text{D}_2\text{O}$ , 25  $^\circ\text{C}$ . The peak at 3.24 ppm is from a contaminant.

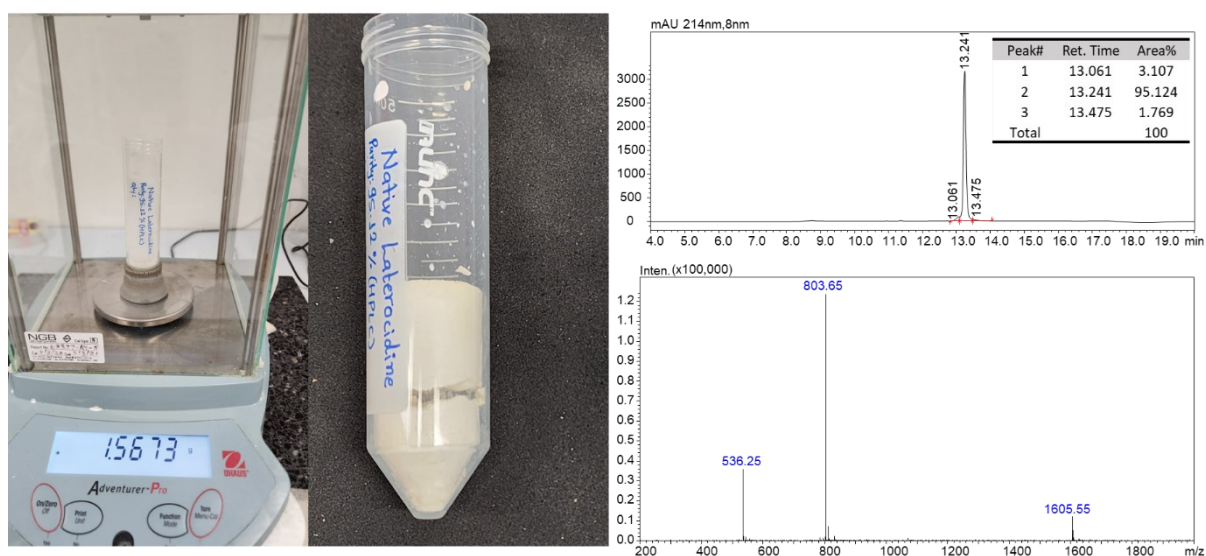

**Figure S37.** Gram-scale synthesis of native laterocidine: TFA salt was obtained in a yield of 1.6 g (9.9 %) from a 10 mmol scale.

**Table S3:**  $^1\text{H}$  and  $^{13}\text{C}$  chemical shift of laterocidine<sub>2</sub>

| Res No | Res name | Atom | Shift / ppm |
|--------|----------|------|-------------|
| 0      | LIP      | QG   | 1.084       |
| 0      | LIP      | CD   | 26.386      |
| 0      | LIP      | CE   | 38.115      |
| 0      | LIP      | QE   | 0.969       |
| 0      | LIP      | CF   | 27.096      |
| 0      | LIP      | HF   | 1.321       |
| 0      | LIP      | CI   | 21.844      |
| 0      | LIP      | QQD  | 0.678       |
| 0      | LIP      | CA   | 35.311      |
| 0      | LIP      | HA   | 2.117       |
| 0      | LIP      | CB   | 25.161      |
| 0      | LIP      | QB   | 1.364       |
| 0      | LIP      | CG   | 28.36       |
| 1      | D-SER    | H    | 8.041       |
| 1      | D-SER    | CA   | 55.497      |
| 1      | D-SER    | HA   | 4.209       |
| 1      | D-SER    | CB   | 60.828      |
| 1      | D-SER    | QB   | 3.603       |
| 2      | D-TYR    | H    | 7.788       |
| 2      | D-TYR    | CA   | 54.994      |
| 2      | D-TYR    | HA   | 4.32        |
| 2      | D-TYR    | CB   | 35.69       |

|   |       |     |         |
|---|-------|-----|---------|
| 2 | D-TYR | QB  | 2.656   |
| 2 | D-TYR | QD  | 6.756   |
| 2 | D-TYR | QE  | 6.601   |
| 2 | D-TYR | CD1 | 130.329 |
| 2 | D-TYR | CE1 | 115.455 |
| 3 | D-TRP | H   | 7.656   |
| 3 | D-TRP | HA  | 4.582   |
| 3 | D-TRP | CB  | 27.007  |
| 3 | D-TRP | HB2 | 3.16    |
| 3 | D-TRP | HB3 | 3.006   |
| 3 | D-TRP | CD1 | 124.334 |
| 3 | D-TRP | CE3 | 117.927 |
| 3 | D-TRP | HD1 | 7.044   |
| 3 | D-TRP | HE3 | 7.419   |
| 3 | D-TRP | CZ3 | 119.276 |
| 3 | D-TRP | CZ2 | 111.783 |
| 3 | D-TRP | HE1 | 9.993   |
| 3 | D-TRP | HZ3 | 7.025   |
| 3 | D-TRP | CH2 | 121.749 |
| 3 | D-TRP | HZ2 | 7.382   |
| 3 | D-TRP | HH2 | 7.134   |
| 4 | D-ORN | CG  | 23.345  |
| 4 | D-ORN | QG  | 1.467   |
| 4 | D-ORN | CD  | 38.788  |

|   |       |     |        |
|---|-------|-----|--------|
| 4 | D-ORN | QD  | 2.853  |
| 4 | D-ORN | H   | 8.058  |
| 4 | D-ORN | HA  | 4.193  |
| 4 | D-ORN | CB  | 27.807 |
| 4 | D-ORN | HB3 | 1.556  |
| 4 | D-ORN | HB2 | 1.728  |
| 5 | ORN   | H   | 8.143  |
| 5 | ORN   | CA  | 53.234 |
| 5 | ORN   | HA  | 4.183  |
| 5 | ORN   | CB  | 27.61  |
| 5 | ORN   | HB3 | 1.624  |
| 5 | ORN   | HB2 | 1.778  |
| 5 | ORN   | CG  | 23.424 |
| 5 | ORN   | QG  | 1.597  |
| 5 | ORN   | CD  | 38.993 |
| 5 | ORN   | QD  | 2.86   |
| 6 | GLY   | H   | 8.203  |
| 6 | GLY   | CA  | 42.12  |
| 6 | GLY   | QA  | 3.759  |
| 7 | D-ORN | H   | 7.941  |
| 7 | D-ORN | HA  | 4.193  |
| 7 | D-ORN | CB  | 28.321 |
| 7 | D-ORN | HB2 | 1.502  |
| 7 | D-ORN | CG  | 23.029 |

|   |       |     |         |
|---|-------|-----|---------|
| 7 | D-ORN | HB3 | 1.452   |
| 7 | D-ORN | QG  | 1.396   |
| 7 | D-ORN | CD  | 38.857  |
| 7 | D-ORN | QD  | 2.742   |
| 8 | TRP   | H   | 8.062   |
| 8 | TRP   | CA  | 53.486  |
| 8 | TRP   | HA  | 4.558   |
| 8 | TRP   | CB  | 27.333  |
| 8 | TRP   | HB2 | 3.091   |
| 8 | TRP   | HB3 | 3.011   |
| 8 | TRP   | CD1 | 124.334 |
| 8 | TRP   | CE3 | 118.265 |
| 8 | TRP   | HD1 | 7.029   |
| 8 | TRP   | HE3 | 7.411   |
| 8 | TRP   | CZ3 | 119.164 |
| 8 | TRP   | CZ2 | 111.67  |
| 8 | TRP   | HE1 | 9.979   |
| 8 | TRP   | HZ3 | 6.984   |
| 8 | TRP   | CH2 | 121.936 |
| 8 | TRP   | HZ2 | 7.353   |
| 8 | TRP   | HH2 | 7.106   |
| 9 | THR   | H   | 7.638   |
| 9 | THR   | CA  | 54.391  |
| 9 | THR   | HA  | 4.402   |

|    |     |         |              |
|----|-----|---------|--------------|
| 9  | THR | CB      | 71.988       |
| 9  | THR | HB      | 4.954        |
| 9  | THR | QG2     | 0.964        |
| 9  | THR | CG2     | 14.42        |
| 10 | ILE | H       | 8.087        |
| 10 | ILE | CA      | 58.213       |
| 10 | ILE | HA      | 3.877        |
| 10 | ILE | CB      | 36.298       |
| 10 | ILE | HB      | 1.591        |
| 10 | ILE | QG2     | 0.786        |
| 10 | ILE | CG2     | 21.59        |
| 10 | ILE | HG12    | 1.378        |
| 10 | ILE | HG13    | 1.083        |
| 10 | ILE | QD1     | 0.812        |
| 10 | ILE | CD1     | 10.313       |
| 11 | ASN | H       | 9.078        |
| 11 | ASN | CA      | 52.379       |
| 11 | ASN | HA      | 4.249        |
| 11 | ASN | CB      | 35.682       |
| 11 | ASN | HB2     | 2.931        |
| 11 | ASN | HB3     | 2.611        |
| 11 | ASN | HD21/22 | Not observed |
| 12 | GLY | H       | 8.224        |
| 12 | GLY | CA      | 42.421       |

|    |     |     |        |
|----|-----|-----|--------|
| 12 | GLY | HA2 | 4.104  |
| 12 | GLY | HA3 | 3.415  |
| 13 | GLY | H   | 7.618  |
| 13 | GLY | CA  | 41.516 |
| 13 | GLY | HA2 | 4.374  |
| 13 | GLY | HA3 | 3.536  |

**Table S4:** NMR structural statistics:

|                                                             |                                |
|-------------------------------------------------------------|--------------------------------|
| NOEs:                                                       | 376                            |
| short-range, $ i-j  \leq 1$ :                               | 195                            |
| medium-range, $1 <  i-j  < 5$ :                             | 120                            |
| long-range, $ i-j  \geq 5$ :                                | 61                             |
| CYANA target function:                                      | $0.37 \pm 0.004 \text{ \AA}^2$ |
| <b>RMS from experimental restraints<sup>a</sup></b>         | <b>&lt;41&gt;</b>              |
| Distances ( $\text{\AA}$ )                                  | $0.017 \pm 0.0024$             |
| Max NOE violation ( $\text{\AA}$ )                          | 0.13                           |
| <b>Deviations from idealized covalent geometry</b>          |                                |
| Bonds ( $\text{\AA}$ )                                      | $0.0018 \pm 0.00026$           |
| Angles ( $^\circ$ )                                         | $0.3863 \pm 0.0347$            |
| Improper ( $^\circ$ )                                       | $0.1831 \pm 0.0272$            |
| <b>Lennard-Jones potential energy<sup>b</sup></b>           |                                |
| $E_{LJ}$ ( $\text{kcal}\cdot\text{mol}^{-1}$ )              | $-72.51 \pm 1.52$              |
| <b>RMSD to the mean structure (<math>\text{\AA}</math>)</b> |                                |



|                        |                 |
|------------------------|-----------------|
| Backbone atoms         | 0.14 +/- 0.03 Å |
| All non-hydrogen atoms | 0.47 +/- 0.13 Å |

<sup>a</sup><41> are the final 41 XplorNIH simulated annealing structures accepted from 100 calculated with no NOE violation > 0.13 Å. <sup>b</sup>The Lennard-Jones-van der Waas energy was not included in the target function for simulated annealing.

**Table S5:** Amide temperature coefficients (-ppb/K)

|        |     |
|--------|-----|
| D-ser1 | 6.9 |
| D-Tyr2 | 9.3 |
| D-Trp3 | 6.3 |
| D-Orn4 | 7.5 |
| Orn5   | 9.2 |
| Gly6   | 7.4 |
| D-Orn7 | 2.5 |
| Trp8   | 7.6 |
| Thr9   | 0.7 |
| Ile10  | 5.8 |
| Asn11  | 6.3 |
| Gly12  | 6.6 |
| Gly13  | 0.9 |

**Table S6: NOE Restraints**

|   |      |    |    |      |     |      |
|---|------|----|----|------|-----|------|
| 0 | OCTN | HA | 10 | ILE  | QD1 | 5.06 |
| 0 | OCTN | HA | 0  | OCTN | HF  | 5.09 |
| 0 | OCTN | HA | 0  | OCTN | QD  | 4.32 |
| 0 | OCTN | HA | 0  | OCTN | QE  | 4.57 |
| 0 | OCTN | HA | 0  | OCTN | QG  | 4.01 |
| 0 | OCTN | HA | 0  | OCTN | QQD | 4.73 |
| 0 | OCTN | HA | 1  | DSER | H   | 3.62 |
| 0 | OCTN | HA | 1  | DSER | HA  | 5.04 |
| 0 | OCTN | HA | 1  | DSER | QB  | 5.11 |
| 0 | OCTN | HA | 2  | DTYR | H   | 5.43 |
| 0 | OCTN | HA | 2  | DTYR | QD  | 5.32 |
| 0 | OCTN | HA | 2  | DTYR | QE  | 5.16 |
| 0 | OCTN | HA | 3  | DTRP | H   | 6    |
| 0 | OCTN | HA | 3  | DTRP | HD1 | 6    |
| 0 | OCTN | HA | 3  | DTRP | HE3 | 6    |
| 0 | OCTN | HA | 3  | DTRP | HZ3 | 6    |

|   |      |    |    |      |      |      |
|---|------|----|----|------|------|------|
| 0 | OCTN | HA | 5  | SORN | QD   | 6    |
| 0 | OCTN | HA | 8  | TRP  | HH2  | 6    |
| 0 | OCTN | QB | 0  | OCTN | QD   | 3.73 |
| 0 | OCTN | QB | 0  | OCTN | QE   | 4.28 |
| 0 | OCTN | QB | 1  | DSER | HA   | 6    |
| 0 | OCTN | QB | 1  | DSER | QB   | 5.71 |
| 0 | OCTN | QB | 2  | DTYR | H    | 5.54 |
| 0 | OCTN | QB | 2  | DTYR | QB   | 6    |
| 0 | OCTN | QB | 2  | DTYR | QD   | 5.2  |
| 0 | OCTN | QB | 3  | DTRP | H    | 6    |
| 0 | OCTN | QB | 3  | DTRP | HD1  | 5.8  |
| 0 | OCTN | QB | 3  | DTRP | HE1  | 5.15 |
| 0 | OCTN | QB | 8  | TRP  | HH2  | 5.38 |
| 0 | OCTN | QB | 8  | TRP  | HZ2  | 5.97 |
| 0 | OCTN | QD | 0  | OCTN | QQD  | 4.26 |
| 0 | OCTN | QD | 2  | DTYR | QE   | 5.54 |
| 0 | OCTN | QD | 3  | DTRP | HE1  | 5.91 |
| 0 | OCTN | QD | 3  | DTRP | HH2  | 6    |
| 0 | OCTN | QD | 3  | DTRP | HZ2  | 6    |
| 0 | OCTN | QD | 3  | DTRP | HZ3  | 6    |
| 0 | OCTN | QD | 7  | DORN | HA   | 5.76 |
| 0 | OCTN | QD | 8  | TRP  | HH2  | 4.95 |
| 0 | OCTN | QD | 8  | TRP  | HZ2  | 5.43 |
| 0 | OCTN | QD | 8  | TRP  | HZ3  | 5.37 |
| 0 | OCTN | QE | 10 | ILE  | HB   | 6    |
| 0 | OCTN | QE | 10 | ILE  | HG13 | 4.95 |
| 0 | OCTN | QE | 0  | OCTN | QQD  | 3.61 |
| 0 | OCTN | QE | 1  | DSER | H    | 6    |
| 0 | OCTN | QE | 1  | DSER | HA   | 6    |

|   |      |     |    |      |     |      |
|---|------|-----|----|------|-----|------|
| 0 | OCTN | QE  | 1  | DSER | QB  | 6    |
| 0 | OCTN | QE  | 2  | DTYR | H   | 4.92 |
| 0 | OCTN | QE  | 2  | DTYR | QB  | 4.89 |
| 0 | OCTN | QE  | 2  | DTYR | QD  | 5.09 |
| 0 | OCTN | QE  | 2  | DTYR | QE  | 4.82 |
| 0 | OCTN | QE  | 3  | DTRP | HD1 | 5.8  |
| 0 | OCTN | QE  | 3  | DTRP | HE1 | 4.75 |
| 0 | OCTN | QE  | 3  | DTRP | HH2 | 6    |
| 0 | OCTN | QE  | 3  | DTRP | HZ2 | 4.97 |
| 0 | OCTN | QE  | 3  | DTRP | HZ3 | 4.61 |
| 0 | OCTN | QE  | 7  | DORN | HA  | 5.03 |
| 0 | OCTN | QE  | 8  | TRP  | HE3 | 4.49 |
| 0 | OCTN | QE  | 8  | TRP  | HH2 | 6    |
| 0 | OCTN | QE  | 8  | TRP  | HZ2 | 5.39 |
| 0 | OCTN | QE  | 8  | TRP  | HZ3 | 5.11 |
| 0 | OCTN | QG  | 0  | OCTN | HF  | 4.17 |
| 0 | OCTN | QG  | 0  | OCTN | QE  | 3.11 |
| 0 | OCTN | QG  | 0  | OCTN | QQD | 3.69 |
| 0 | OCTN | QG  | 1  | DSER | H   | 4.67 |
| 0 | OCTN | QG  | 1  | DSER | HA  | 5.01 |
| 0 | OCTN | QG  | 1  | DSER | QB  | 5.43 |
| 0 | OCTN | QG  | 2  | DTYR | H   | 6    |
| 0 | OCTN | QG  | 2  | DTYR | QB  | 5.1  |
| 0 | OCTN | QG  | 2  | DTYR | QD  | 4.94 |
| 0 | OCTN | QG  | 2  | DTYR | QE  | 5.19 |
| 0 | OCTN | QG  | 3  | DTRP | H   | 6    |
| 0 | OCTN | QG  | 3  | DTRP | HD1 | 6    |
| 0 | OCTN | QG  | 3  | DTRP | HE1 | 5.6  |
| 0 | OCTN | QQD | 10 | ILE  | HA  | 6    |

|   |      |     |    |      |     |      |
|---|------|-----|----|------|-----|------|
| 0 | OCTN | QQD | 10 | ILE  | HB  | 5.11 |
| 0 | OCTN | QQD | 1  | DSER | H   | 5.23 |
| 0 | OCTN | QQD | 1  | DSER | HA  | 6    |
| 0 | OCTN | QQD | 1  | DSER | QB  | 5.71 |
| 0 | OCTN | QQD | 2  | DTYR | QB  | 4.85 |
| 0 | OCTN | QQD | 2  | DTYR | QD  | 4.84 |
| 0 | OCTN | QQD | 2  | DTYR | QE  | 4.82 |
| 0 | OCTN | QQD | 3  | DTRP | HB3 | 5.85 |
| 0 | OCTN | QQD | 3  | DTRP | HD1 | 6    |
| 0 | OCTN | QQD | 3  | DTRP | HE1 | 5.62 |
| 0 | OCTN | QQD | 3  | DTRP | HH2 | 6    |
| 0 | OCTN | QQD | 3  | DTRP | HZ2 | 6    |
| 0 | OCTN | QQD | 3  | DTRP | HZ3 | 5.11 |
| 0 | OCTN | QQD | 7  | DORN | HA  | 6    |
| 0 | OCTN | QQD | 8  | TRP  | HB2 | 6    |
| 0 | OCTN | QQD | 8  | TRP  | HE3 | 4.54 |
| 0 | OCTN | QQD | 8  | TRP  | HH2 | 6    |
| 0 | OCTN | QQD | 8  | TRP  | HZ2 | 5.79 |
| 0 | OCTN | QQD | 8  | TRP  | HZ3 | 4.93 |
| 1 | DSER | H   | 2  | DTYR | H   | 4.73 |
| 1 | DSER | H   | 2  | DTYR | QB  | 5.37 |
| 1 | DSER | H   | 2  | DTYR | QD  | 6    |
| 1 | DSER | HA  | 2  | DTYR | QB  | 5.05 |
| 1 | DSER | HA  | 2  | DTYR | QD  | 5.11 |
| 1 | DSER | HA  | 3  | DTRP | HD1 | 4.31 |
| 1 | DSER | QB  | 2  | DTYR | H   | 4.86 |
| 1 | DSER | QB  | 2  | DTYR | QB  | 5.93 |
| 1 | DSER | QB  | 3  | DTRP | HD1 | 5.85 |
| 2 | DTYR | H   | 2  | DTYR | QB  | 4.04 |

|   |      |    |    |      |      |      |
|---|------|----|----|------|------|------|
| 2 | DTYR | H  | 2  | DTYR | QD   | 4.64 |
| 2 | DTYR | H  | 2  | DTYR | QE   | 4.95 |
| 2 | DTYR | H  | 3  | DTRP | H    | 4.32 |
| 2 | DTYR | H  | 3  | DTRP | HD1  | 6    |
| 2 | DTYR | H  | 3  | DTRP | HE3  | 6    |
| 2 | DTYR | HA | 2  | DTYR | QD   | 4.29 |
| 2 | DTYR | HA | 2  | DTYR | QE   | 5.62 |
| 2 | DTYR | HA | 3  | DTRP | HB3  | 5.42 |
| 2 | DTYR | HA | 3  | DTRP | HD1  | 5.19 |
| 2 | DTYR | QB | 3  | DTRP | H    | 4.38 |
| 2 | DTYR | QB | 3  | DTRP | HA   | 5.5  |
| 2 | DTYR | QB | 3  | DTRP | HD1  | 5.7  |
| 2 | DTYR | QB | 3  | DTRP | HE1  | 6    |
| 2 | DTYR | QB | 3  | DTRP | HE3  | 6    |
| 2 | DTYR | QD | 10 | ILE  | HG13 | 6    |
| 2 | DTYR | QD | 10 | ILE  | QD1  | 5.39 |
| 2 | DTYR | QD | 10 | ILE  | QG2  | 5.95 |
| 2 | DTYR | QD | 3  | DTRP | H    | 4.83 |
| 2 | DTYR | QD | 3  | DTRP | HA   | 5.28 |
| 2 | DTYR | QD | 3  | DTRP | HB2  | 6    |
| 2 | DTYR | QD | 3  | DTRP | HB3  | 5.27 |
| 2 | DTYR | QD | 3  | DTRP | HD1  | 6    |
| 2 | DTYR | QD | 3  | DTRP | HE1  | 5.27 |
| 2 | DTYR | QD | 3  | DTRP | HE3  | 4.87 |
| 2 | DTYR | QD | 3  | DTRP | HH2  | 6    |
| 2 | DTYR | QD | 3  | DTRP | HZ2  | 6    |
| 2 | DTYR | QD | 3  | DTRP | HZ3  | 6    |
| 2 | DTYR | QE | 10 | ILE  | HB   | 6    |
| 2 | DTYR | QE | 10 | ILE  | HG13 | 5.15 |

|   |      |     |    |      |     |      |
|---|------|-----|----|------|-----|------|
| 2 | DTYR | QE  | 10 | ILE  | QD1 | 5.44 |
| 2 | DTYR | QE  | 10 | ILE  | QG2 | 5.09 |
| 2 | DTYR | QE  | 3  | DTRP | H   | 5.45 |
| 2 | DTYR | QE  | 3  | DTRP | HA  | 5.69 |
| 2 | DTYR | QE  | 3  | DTRP | HB2 | 5.79 |
| 2 | DTYR | QE  | 3  | DTRP | HB3 | 5.4  |
| 2 | DTYR | QE  | 3  | DTRP | HD1 | 6    |
| 2 | DTYR | QE  | 3  | DTRP | HE1 | 5.29 |
| 2 | DTYR | QE  | 3  | DTRP | HE3 | 4.85 |
| 2 | DTYR | QE  | 3  | DTRP | HZ2 | 6    |
| 2 | DTYR | QE  | 3  | DTRP | HZ3 | 4.68 |
| 2 | DTYR | QE  | 7  | DORN | HA  | 5.18 |
| 2 | DTYR | QE  | 8  | TRP  | H   | 5.41 |
| 3 | DTRP | H   | 3  | DTRP | HB3 | 4.16 |
| 3 | DTRP | H   | 3  | DTRP | HE1 | 5.35 |
| 3 | DTRP | H   | 4  | DORN | H   | 4.38 |
| 3 | DTRP | H   | 4  | DORN | HA  | 5.27 |
| 3 | DTRP | HA  | 3  | DTRP | HD1 | 3.84 |
| 3 | DTRP | HA  | 3  | DTRP | HE3 | 4.99 |
| 3 | DTRP | HA  | 5  | SORN | H   | 6    |
| 3 | DTRP | HB2 | 3  | DTRP | HD1 | 3.85 |
| 3 | DTRP | HB2 | 3  | DTRP | HE1 | 5.25 |
| 3 | DTRP | HB2 | 3  | DTRP | HZ3 | 5.63 |
| 3 | DTRP | HB2 | 4  | DORN | H   | 4.69 |
| 3 | DTRP | HB2 | 4  | DORN | HA  | 6    |
| 3 | DTRP | HB3 | 4  | DORN | H   | 4.32 |
| 3 | DTRP | HB3 | 4  | DORN | HA  | 6    |
| 3 | DTRP | HD1 | 4  | DORN | H   | 4.27 |
| 3 | DTRP | HD1 | 4  | DORN | HA  | 5.01 |

|   |      |     |    |      |      |      |
|---|------|-----|----|------|------|------|
| 3 | DTRP | HD1 | 4  | DORN | QG   | 6    |
| 3 | DTRP | HD1 | 5  | SORN | HA   | 5.31 |
| 3 | DTRP | HD1 | 5  | SORN | QD   | 5.25 |
| 3 | DTRP | HD1 | 6  | GLY  | H    | 5.46 |
| 3 | DTRP | HD1 | 6  | GLY  | QA   | 5.29 |
| 3 | DTRP | HE1 | 5  | SORN | HA   | 5.66 |
| 3 | DTRP | HE1 | 6  | GLY  | H    | 5.21 |
| 3 | DTRP | HE1 | 6  | GLY  | QA   | 4.89 |
| 3 | DTRP | HE1 | 7  | DORN | HA   | 6    |
| 3 | DTRP | HE3 | 9  | THR  | H    | 4.84 |
| 3 | DTRP | HE3 | 9  | THR  | HA   | 4.91 |
| 3 | DTRP | HE3 | 9  | THR  | HB   | 6    |
| 3 | DTRP | HE3 | 10 | ILE  | HB   | 6    |
| 3 | DTRP | HE3 | 4  | DORN | H    | 5.47 |
| 3 | DTRP | HE3 | 4  | DORN | QG   | 5.66 |
| 3 | DTRP | HE3 | 6  | GLY  | QA   | 5.57 |
| 3 | DTRP | HE3 | 7  | DORN | HA   | 6    |
| 3 | DTRP | HH2 | 10 | ILE  | HG12 | 6    |
| 3 | DTRP | HH2 | 10 | ILE  | HG13 | 6    |
| 3 | DTRP | HH2 | 10 | ILE  | QD1  | 6    |
| 3 | DTRP | HH2 | 10 | ILE  | QG2  | 6    |
| 3 | DTRP | HH2 | 6  | GLY  | QA   | 5.24 |
| 3 | DTRP | HH2 | 7  | DORN | HA   | 5.13 |
| 3 | DTRP | HH2 | 8  | TRP  | H    | 5.66 |
| 3 | DTRP | HH2 | 8  | TRP  | HE3  | 4.01 |
| 3 | DTRP | HZ2 | 10 | ILE  | HG13 | 5.61 |
| 3 | DTRP | HZ2 | 10 | ILE  | QD1  | 6    |
| 3 | DTRP | HZ2 | 5  | SORN | QD   | 6    |
| 3 | DTRP | HZ2 | 6  | GLY  | H    | 6    |



|   |      |     |    |      |      |      |
|---|------|-----|----|------|------|------|
| 3 | DTRP | HZ2 | 6  | GLY  | QA   | 5.22 |
| 3 | DTRP | HZ2 | 7  | DORN | HA   | 5.39 |
| 3 | DTRP | HZ3 | 9  | THR  | H    | 4.82 |
| 3 | DTRP | HZ3 | 9  | THR  | HA   | 6    |
| 3 | DTRP | HZ3 | 9  | THR  | HB   | 5.25 |
| 3 | DTRP | HZ3 | 9  | THR  | QG2  | 6    |
| 3 | DTRP | HZ3 | 10 | ILE  | HB   | 6    |
| 3 | DTRP | HZ3 | 10 | ILE  | HG12 | 4.59 |
| 3 | DTRP | HZ3 | 10 | ILE  | HG13 | 4.4  |
| 3 | DTRP | HZ3 | 10 | ILE  | QD1  | 4.87 |
| 3 | DTRP | HZ3 | 10 | ILE  | QG2  | 5.13 |
| 3 | DTRP | HZ3 | 6  | GLY  | H    | 5.54 |
| 3 | DTRP | HZ3 | 6  | GLY  | QA   | 4.88 |
| 3 | DTRP | HZ3 | 7  | DORN | H    | 5.63 |
| 3 | DTRP | HZ3 | 7  | DORN | HA   | 4.28 |
| 3 | DTRP | HZ3 | 8  | TRP  | H    | 4.3  |
| 4 | DORN | H   | 4  | DORN | QD   | 5.02 |
| 4 | DORN | H   | 4  | DORN | QG   | 4.22 |
| 4 | DORN | H   | 6  | GLY  | H    | 6    |
| 4 | DORN | HA  | 4  | DORN | QD   | 4.84 |
| 4 | DORN | HB2 | 4  | DORN | QD   | 4.21 |
| 4 | DORN | HB2 | 5  | SORN | H    | 5.05 |
| 4 | DORN | HB2 | 5  | SORN | HA   | 4.5  |
| 4 | DORN | HB3 | 4  | DORN | QD   | 3.63 |
| 4 | DORN | QD  | 5  | SORN | H    | 5.16 |
| 4 | DORN | QG  | 5  | SORN | H    | 5.15 |
| 4 | DORN | QG  | 5  | SORN | HA   | 6    |
| 5 | SORN | H   | 5  | SORN | QD   | 6    |
| 5 | SORN | H   | 5  | SORN | QG   | 4.32 |

|   |      |    |    |      |      |      |
|---|------|----|----|------|------|------|
| 5 | SORN | H  | 6  | GLY  | QA   | 5.06 |
| 5 | SORN | HA | 5  | SORN | QD   | 4.25 |
| 5 | SORN | HA | 5  | SORN | QG   | 3.7  |
| 5 | SORN | HA | 6  | GLY  | QA   | 5.01 |
| 5 | SORN | QB | 6  | GLY  | QA   | 5.81 |
| 5 | SORN | QD | 6  | GLY  | H    | 5.39 |
| 5 | SORN | QD | 6  | GLY  | QA   | 6    |
| 5 | SORN | QG | 6  | GLY  | H    | 4.56 |
| 5 | SORN | QG | 6  | GLY  | QA   | 5.15 |
| 6 | GLY  | H  | 7  | DORN | H    | 4.49 |
| 6 | GLY  | QA | 9  | THR  | QG2  | 6    |
| 6 | GLY  | QA | 7  | DORN | HA   | 5.26 |
| 6 | GLY  | QA | 7  | DORN | QG   | 6    |
| 6 | GLY  | QA | 8  | TRP  | H    | 4.94 |
| 7 | DORN | H  | 9  | THR  | H    | 6    |
| 7 | DORN | H  | 9  | THR  | QG2  | 5.75 |
| 7 | DORN | H  | 7  | DORN | QD   | 5.6  |
| 7 | DORN | H  | 7  | DORN | QG   | 4.47 |
| 7 | DORN | H  | 8  | TRP  | H    | 4.17 |
| 7 | DORN | H  | 8  | TRP  | HD1  | 5.81 |
| 7 | DORN | HA | 9  | THR  | H    | 5.07 |
| 7 | DORN | HA | 10 | ILE  | HG13 | 6    |
| 7 | DORN | HA | 7  | DORN | QD   | 4.94 |
| 7 | DORN | HA | 7  | DORN | QG   | 4.07 |
| 7 | DORN | HA | 8  | TRP  | H    | 3.47 |
| 7 | DORN | HA | 8  | TRP  | HB2  | 6    |
| 7 | DORN | HA | 8  | TRP  | HD1  | 6    |
| 7 | DORN | HA | 8  | TRP  | HE1  | 5.15 |
| 7 | DORN | HA | 8  | TRP  | HE3  | 5.1  |

|   |      |     |    |     |      |      |
|---|------|-----|----|-----|------|------|
| 7 | DORN | HA  | 8  | TRP | HH2  | 6    |
| 7 | DORN | HA  | 8  | TRP | HZ2  | 5.79 |
| 7 | DORN | HA  | 8  | TRP | HZ3  | 6    |
| 7 | DORN | QB  | 8  | TRP | H    | 4.25 |
| 7 | DORN | QB  | 8  | TRP | HD1  | 4.92 |
| 7 | DORN | QB  | 8  | TRP | HE3  | 5.81 |
| 7 | DORN | QD  | 8  | TRP | H    | 5.31 |
| 7 | DORN | QD  | 8  | TRP | HD1  | 6    |
| 7 | DORN | QD  | 8  | TRP | HE1  | 5.35 |
| 7 | DORN | QD  | 8  | TRP | HZ2  | 6    |
| 7 | DORN | QG  | 8  | TRP | H    | 4.49 |
| 8 | TRP  | H   | 9  | THR | H    | 4.56 |
| 8 | TRP  | H   | 9  | THR | HA   | 4.68 |
| 8 | TRP  | H   | 9  | THR | HB   | 6    |
| 8 | TRP  | H   | 9  | THR | QG2  | 4.71 |
| 8 | TRP  | H   | 10 | ILE | HG13 | 4.44 |
| 8 | TRP  | H   | 8  | TRP | HE1  | 5.47 |
| 8 | TRP  | H   | 8  | TRP | HE3  | 4.4  |
| 8 | TRP  | HA  | 9  | THR | QG2  | 4.4  |
| 8 | TRP  | HA  | 8  | TRP | HD1  | 4    |
| 8 | TRP  | HA  | 8  | TRP | HE1  | 5.6  |
| 8 | TRP  | HA  | 8  | TRP | HE3  | 5.03 |
| 8 | TRP  | HB2 | 9  | THR | H    | 4.48 |
| 8 | TRP  | HB2 | 9  | THR | QG2  | 4.52 |
| 8 | TRP  | HB2 | 10 | ILE | HG12 | 5.18 |
| 8 | TRP  | HB2 | 10 | ILE | HG13 | 5.08 |
| 8 | TRP  | HB2 | 10 | ILE | QD1  | 6    |
| 8 | TRP  | HB2 | 10 | ILE | QG2  | 5.24 |
| 8 | TRP  | HB2 | 8  | TRP | HZ3  | 5.23 |

|   |     |     |    |     |      |      |
|---|-----|-----|----|-----|------|------|
| 8 | TRP | HB3 | 9  | THR | H    | 4.75 |
| 8 | TRP | HB3 | 9  | THR | QG2  | 5.11 |
| 8 | TRP | HB3 | 10 | ILE | HG13 | 5.85 |
| 8 | TRP | HE3 | 9  | THR | H    | 6    |
| 8 | TRP | HE3 | 10 | ILE | H    | 5.08 |
| 8 | TRP | HE3 | 10 | ILE | HB   | 6    |
| 8 | TRP | HE3 | 10 | ILE | HG12 | 4.68 |
| 8 | TRP | HE3 | 10 | ILE | HG13 | 4.78 |
| 8 | TRP | HE3 | 10 | ILE | QD1  | 6    |
| 8 | TRP | HE3 | 10 | ILE | QG2  | 4.92 |
| 8 | TRP | HH2 | 10 | ILE | QD1  | 5.4  |
| 8 | TRP | HH2 | 10 | ILE | QG2  | 6    |
| 8 | TRP | HZ2 | 10 | ILE | QD1  | 6    |
| 8 | TRP | HZ3 | 10 | ILE | HG12 | 5.67 |
| 8 | TRP | HZ3 | 10 | ILE | HG13 | 5    |
| 8 | TRP | HZ3 | 10 | ILE | QD1  | 5.13 |
| 8 | TRP | HZ3 | 10 | ILE | QG2  | 4.79 |
| 9 | THR | H   | 9  | THR | QG2  | 3.83 |
| 9 | THR | H   | 10 | ILE | HG12 | 6    |
| 9 | THR | H   | 10 | ILE | HG13 | 5.68 |
| 9 | THR | HA  | 9  | THR | QG2  | 3.8  |
| 9 | THR | HA  | 10 | ILE | H    | 3.42 |
| 9 | THR | HA  | 10 | ILE | HA   | 5.43 |
| 9 | THR | HA  | 10 | ILE | HB   | 5.37 |
| 9 | THR | HA  | 10 | ILE | QD1  | 5.51 |
| 9 | THR | HB  | 10 | ILE | H    | 4.62 |
| 9 | THR | QG2 | 10 | ILE | H    | 4.32 |
| 9 | THR | QG2 | 10 | ILE | HA   | 4.86 |
| 9 | THR | QG2 | 11 | ASN | H    | 6    |

|    |     |      |    |     |      |      |
|----|-----|------|----|-----|------|------|
| 9  | THR | QG2  | 12 | GLY | H    | 4.94 |
| 9  | THR | QG2  | 13 | GLY | QA   | 5.45 |
| 10 | ILE | H    | 10 | ILE | HB   | 3.95 |
| 10 | ILE | H    | 10 | ILE | HG12 | 4.6  |
| 10 | ILE | H    | 10 | ILE | HG13 | 4.45 |
| 10 | ILE | H    | 10 | ILE | QD1  | 5.07 |
| 10 | ILE | H    | 10 | ILE | QG2  | 4.36 |
| 10 | ILE | H    | 11 | ASN | H    | 5.36 |
| 10 | ILE | H    | 13 | GLY | H    | 4.65 |
| 10 | ILE | H    | 13 | GLY | QA   | 5.41 |
| 10 | ILE | HA   | 10 | ILE | QD1  | 4.42 |
| 10 | ILE | HA   | 10 | ILE | QG2  | 4.08 |
| 10 | ILE | HA   | 11 | ASN | HA   | 5.25 |
| 10 | ILE | HA   | 12 | GLY | H    | 5.12 |
| 10 | ILE | HB   | 10 | ILE | QD1  | 4.08 |
| 10 | ILE | HB   | 11 | ASN | H    | 5.04 |
| 10 | ILE | HG12 | 11 | ASN | H    | 5.16 |
| 10 | ILE | HG12 | 12 | GLY | H    | 6    |
| 10 | ILE | HG12 | 13 | GLY | H    | 6    |
| 10 | ILE | HG13 | 11 | ASN | H    | 5.13 |
| 10 | ILE | HG13 | 11 | ASN | QB   | 5.81 |
| 10 | ILE | HG13 | 13 | GLY | H    | 5.58 |
| 10 | ILE | QD1  | 11 | ASN | H    | 6    |
| 10 | ILE | QG2  | 10 | ILE | HG13 | 3.9  |
| 10 | ILE | QG2  | 11 | ASN | H    | 4.3  |
| 10 | ILE | QG2  | 11 | ASN | HA   | 4.63 |
| 10 | ILE | QG2  | 11 | ASN | HB2  | 4.79 |
| 10 | ILE | QG2  | 11 | ASN | HB3  | 4.79 |
| 10 | ILE | QG2  | 11 | ASN | QB   | 4.1  |

|                       |     |     |    |     |     |      |
|-----------------------|-----|-----|----|-----|-----|------|
| 10                    | ILE | QG2 | 12 | GLY | H   | 4.91 |
| 10                    | ILE | QG2 | 13 | GLY | H   | 4.97 |
| 11                    | ASN | H   | 12 | GLY | H   | 4.46 |
| 11                    | ASN | H   | 13 | GLY | H   | 5.57 |
| 11                    | ASN | HA  | 13 | GLY | H   | 5.34 |
| 11                    | ASN | HB2 | 12 | GLY | H   | 5.07 |
| 11                    | ASN | HB2 | 13 | GLY | H   | 5.64 |
| 11                    | ASN | HB3 | 12 | GLY | H   | 5.07 |
| 11                    | ASN | HB3 | 13 | GLY | H   | 5.64 |
| 12                    | GLY | H   | 13 | GLY | H   | 4.23 |
| 12                    | GLY | H   | 13 | GLY | HA2 | 5.47 |
| 12                    | GLY | H   | 13 | GLY | HA3 | 5.47 |
| Ether bond restraints |     |     |    |     |     |      |
| 9                     | THR | OG1 | 13 | GLY | C   | 1.47 |
| 9                     | THR | OG1 | 13 | GLY | CA  | 2.55 |
| 9                     | THR | OG1 | 13 | GLY | O   | 2.36 |

## **References:**

- 1 Roberts, K. D. *et al.* Antimicrobial Activity and Toxicity of the Major Lipopeptide Components of Polymyxin B and Colistin: Last-Line Antibiotics against Multidrug-Resistant Gram-Negative Bacteria. *ACS Infectious Diseases* **1**, 568-575, doi:10.1021/acsinfecdis.5b00085 (2015).
- 2 Institute, C. a. L. S. in *M100-S23* (Clinical and Laboratory Standards Institute, Wayne, PA, USA, 2013).
- 3 Zoete, V., Cuendet, M. A., Grosdidier, A. & Michielin, O. SwissParam: A fast force field generation tool for small organic molecules. *Journal of Computational Chemistry* **32**, 2359-2368, doi:<https://doi.org/10.1002/jcc.21816> (2011).
- 4 Van Der Spoel, D. *et al.* GROMACS: Fast, flexible, and free. *Journal of Computational Chemistry* **26**, 1701-1718, doi:<https://doi.org/10.1002/jcc.20291> (2005).
- 5 Klauda, J. B. *et al.* Update of the CHARMM All-Atom Additive Force Field for Lipids: Validation on Six Lipid Types. *The Journal of Physical Chemistry B* **114**, 7830-7843, doi:10.1021/jp101759q (2010).
- 6 Parrinello, M. & Rahman, A. Polymorphic transitions in single crystals: A new molecular dynamics method. *Journal of Applied Physics* **52**, 7182-7190, doi:10.1063/1.328693 (1981).
- 7 Nosé, S. A molecular dynamics method for simulations in the canonical ensemble. *Molecular Physics* **52**, 255-268, doi:10.1080/00268978400101201 (1984).
- 8 Hoover, W. G. Canonical dynamics: Equilibrium phase-space distributions. *Physical Review A* **31**, 1695-1697, doi:10.1103/PhysRevA.31.1695 (1985).
- 9 Darden, T., York, D. & Pedersen, L. Particle mesh Ewald: An N·log(N) method for Ewald sums in large systems. *The Journal of Chemical Physics* **98**, 10089-10092, doi:10.1063/1.464397 (1993).
